# Supplementary material for: Exploration of Long Non-coding RNAs and Circular RNAs in Porcine Milk Exosomes
Source: Front Genet. 2020 Jul 2;11:652. doi: 10.3389/fgene.2020.00652 (PMC7343709; doi:10.3389/fgene.2020.00652)
Supplement: Supplementary file 9 [file Table_9.XLSX]

## Sheet: miRanda
Supplemental file 9: miRanda predicted target miRNAs of lncRNA in PME
miRNA ID	lncRNA ID	Energy kCal/Mol	Positions
>>ssc-miR-103	LNC_000261	-20.53	1660
>>ssc-miR-103	LNC_001897	-20.17	493
>>ssc-miR-103	LNC_002273	-24.53	6323
>>ssc-miR-10382	LNC_001602	-24.06	3640
>>ssc-miR-10382	LNC_002280	-28.82	1506
>>ssc-miR-10382	LNC_001711	-26.03	32
>>ssc-miR-10382	LNC_000689	-22.27	141
>>ssc-miR-10382	LNC_002450	-27.93	114
>>ssc-miR-10382	LNC_002328	-28.82	1207
>>ssc-miR-10382	LNC_002001	-20.08	278
>>ssc-miR-10382	LNC_000499	-34.02	897 184
>>ssc-miR-10383	LNC_001520	-20.07	41
>>ssc-miR-10383	LNC_001346	-26.73	3554
>>ssc-miR-10383	LNC_001235	-26.73	1868
>>ssc-miR-10383	LNC_002450	-25.18	1166
>>ssc-miR-10383	LNC_002273	-21.67	2379
>>ssc-miR-10384	LNC_001346	-26.77	3178 2477
>>ssc-miR-10384	LNC_001235	-26.77	1492 791
>>ssc-miR-10384	LNC_001432	-24.23	1260
>>ssc-miR-10384	LNC_000298	-30.75	38
>>ssc-miR-10386	LNC_001602	-37.59	1233
>>ssc-miR-10388	LNC_001590	-22.68	482
>>ssc-miR-10388	LNC_001602	-23.72	3912
>>ssc-miR-10389	LNC_000504	-20.85	1115
>>ssc-miR-10389	LNC_002331	-27.52	485
>>ssc-miR-10389	LNC_002273	-22.66	4817 7698
>>ssc-miR-10391	LNC_000994	-20.44	2064
>>ssc-miR-10391	LNC_001346	-26.01	2992
>>ssc-miR-10391	LNC_001374	-22.95	723
>>ssc-miR-10391	LNC_001235	-26.01	1306
>>ssc-miR-10391	LNC_001375	-22.95	723
>>ssc-miR-10391	LNC_002450	-24.07	561
>>ssc-miR-105-1	LNC_001444	-21.15	461
>>ssc-miR-106a	LNC_002273	-22.5	7697
>>ssc-miR-107	LNC_002292	-21.64	92 544
>>ssc-miR-107	LNC_000261	-20.71	1660
>>ssc-miR-107	LNC_002273	-21.03	6323
>>ssc-miR-107	LNC_000298	-20.38	4182
>>ssc-miR-10a-5p	LNC_001235	-21.68	3253
>>ssc-miR-10b	LNC_001235	-20.16	3253
>>ssc-miR-1224	LNC_001995	-25.18	311
>>ssc-miR-1224	LNC_002332	-21.89	416
>>ssc-miR-122-5p	LNC_002273	-20.67	2219
>>ssc-miR-122-5p	LNC_001053	-20.46	374
>>ssc-miR-125a	LNC_001995	-32.84	182
>>ssc-miR-125a	LNC_000994	-22.56	2693
>>ssc-miR-125a	LNC_002276	-21.93	769
>>ssc-miR-125a	LNC_001374	-23.74	707
>>ssc-miR-125a	LNC_001235	-21.01	3269
>>ssc-miR-125a	LNC_001375	-23.74	707
>>ssc-miR-125b	LNC_001995	-20.47	186
>>ssc-miR-125b	LNC_002276	-21.58	770
>>ssc-miR-125b	LNC_000504	-21.33	479
>>ssc-miR-125b	LNC_001374	-21.13	706
>>ssc-miR-125b	LNC_001235	-22.73	219
>>ssc-miR-125b	LNC_001375	-21.13	706
>>ssc-miR-126-3p	LNC_002273	-22.94	9050
>>ssc-miR-127	LNC_001602	-25.51	2924 4556
>>ssc-miR-127	LNC_001374	-22.04	290
>>ssc-miR-127	LNC_001375	-22.04	290
>>ssc-miR-127	LNC_001432	-26.26	1265
>>ssc-miR-127	LNC_002378	-25.51	78
>>ssc-miR-127	LNC_000962	-24.73	359
>>ssc-miR-127	LNC_000550	-26.3	55
>>ssc-miR-127	LNC_000362	-29.15	1
>>ssc-miR-127	LNC_000740	-27.18	268
>>ssc-miR-127	LNC_002273	-24.84	2546
>>ssc-miR-127	LNC_000070	-25.51	76
>>ssc-miR-127	LNC_000374	-25.51	52
>>ssc-miR-127	LNC_000926	-22.45	148
>>ssc-miR-127	LNC_000298	-29.21	43
>>ssc-miR-127	LNC_002044	-25.51	207
>>ssc-miR-127	LNC_000920	-31.37	69
>>ssc-miR-127	LNC_002065	-28.4	116
>>ssc-miR-127	LNC_000370	-25.51	17
>>ssc-miR-127	LNC_000303	-21.72	735
>>ssc-miR-127	ALDBSSCT0000001463	-21.16	2414
>>ssc-miR-1271-3p	LNC_001346	-24.78	1475
>>ssc-miR-1271-3p	LNC_000261	-23.9	1090
>>ssc-miR-1271-3p	LNC_001235	-23.24	2545
>>ssc-miR-1271-3p	LNC_002273	-22.56	6452 9291
>>ssc-miR-1271-5p	LNC_001096	-24.17	2477
>>ssc-miR-128	LNC_000994	-20.58	323
>>ssc-miR-128	LNC_002273	-25.8	1139 6410
>>ssc-miR-1285	LNC_002276	-23.34	1096
>>ssc-miR-1285	LNC_002190	-23.75	480
>>ssc-miR-1285	LNC_000298	-20.17	4066
>>ssc-miR-1296-3p	LNC_002272	-21.06	2155
>>ssc-miR-1296-3p	LNC_001432	-24.5	1627
>>ssc-miR-1296-3p	LNC_001588	-22.03	418
>>ssc-miR-1296-3p	LNC_001444	-23.83	472
>>ssc-miR-1296-3p	LNC_002273	-21.06	10314 3017
>>ssc-miR-1296-3p	LNC_000303	-28.13	1528
>>ssc-miR-1296-5p	LNC_002272	-22.29	1535
>>ssc-miR-1296-5p	LNC_001432	-21.37	700
>>ssc-miR-1296-5p	LNC_001300	-21.1	116
>>ssc-miR-1296-5p	LNC_001217	-23.7	12
>>ssc-miR-1296-5p	LNC_000226	-23.16	294 152
>>ssc-miR-1296-5p	LNC_002273	-25.35	1525 9694
>>ssc-miR-1296-5p	LNC_000926	-22.21	246
>>ssc-miR-1296-5p	LNC_000044	-21.81	180
>>ssc-miR-129a-3p	LNC_001346	-20.48	824
>>ssc-miR-129a-3p	LNC_002273	-20.25	6844
>>ssc-miR-129a-5p	LNC_002279	-23.76	1267
>>ssc-miR-129a-5p	LNC_001678	-24.18	1482
>>ssc-miR-129a-5p	LNC_001300	-20.58	127
>>ssc-miR-129a-5p	LNC_000226	-23.43	160
>>ssc-miR-129a-5p	LNC_000338	-21.68	264
>>ssc-miR-129a-5p	LNC_001312	-21.81	156
>>ssc-miR-129a-5p	LNC_002273	-23.11	5305
>>ssc-miR-129a-5p	LNC_000797	-21.47	196
>>ssc-miR-129a-5p	LNC_000686	-23.42	119
>>ssc-miR-129a-5p	LNC_000298	-22.26	1764
>>ssc-miR-129a-5p	LNC_000629	-20.58	212
>>ssc-miR-129a-5p	LNC_001493	-24.18	179
>>ssc-miR-129b	LNC_002279	-23.76	1267
>>ssc-miR-129b	LNC_001678	-24.18	1482
>>ssc-miR-129b	LNC_001300	-20.58	127
>>ssc-miR-129b	LNC_000226	-23.43	160
>>ssc-miR-129b	LNC_000338	-21.68	264
>>ssc-miR-129b	LNC_001312	-21.81	156
>>ssc-miR-129b	LNC_002273	-23.11	5305
>>ssc-miR-129b	LNC_000797	-21.47	196
>>ssc-miR-129b	LNC_000686	-23.42	119
>>ssc-miR-129b	LNC_000298	-22.26	1764
>>ssc-miR-129b	LNC_000629	-20.58	212
>>ssc-miR-129b	LNC_001493	-24.18	179
>>ssc-miR-1306-3p	LNC_001588	-20.83	206
>>ssc-miR-1306-5p	LNC_001995	-20.27	313
>>ssc-miR-1306-5p	LNC_002272	-20.75	1233
>>ssc-miR-1306-5p	LNC_001602	-28.82	424
>>ssc-miR-1306-5p	LNC_001346	-28.24	309
>>ssc-miR-1306-5p	LNC_000261	-27.74	1096 2130
>>ssc-miR-1306-5p	LNC_000236	-25.01	659
>>ssc-miR-1306-5p	LNC_001235	-29.04	113
>>ssc-miR-1306-5p	LNC_001412	-28.07	519
>>ssc-miR-1307	LNC_001346	-31.77	224
>>ssc-miR-1307	LNC_002016	-25.37	1798
>>ssc-miR-1307	LNC_001432	-26.56	55
>>ssc-miR-130b-3p	LNC_001678	-24.73	2378
>>ssc-miR-130b-5p	LNC_001602	-20.14	3832
>>ssc-miR-130b-5p	LNC_002016	-21.73	1571
>>ssc-miR-130b-5p	LNC_000303	-22.18	1251
>>ssc-miR-132	LNC_002272	-23.55	4290
>>ssc-miR-132	LNC_002273	-23.55	12449
>>ssc-miR-133b	ALDBSSCT0000003459	-25.76	81
>>ssc-miR-1343	LNC_000708	-26.61	586
>>ssc-miR-1343	LNC_002272	-24.85	5309
>>ssc-miR-1343	LNC_002280	-26.63	2535
>>ssc-miR-1343	LNC_001520	-25.75	49
>>ssc-miR-1343	LNC_001346	-31.5	1429 2108
>>ssc-miR-1343	LNC_000261	-28.23	247 1476
>>ssc-miR-1343	LNC_002016	-21.4	1282 1052
>>ssc-miR-1343	LNC_001235	-22.64	422
>>ssc-miR-1343	LNC_001588	-24.79	346 181
>>ssc-miR-1343	LNC_002328	-25.03	2859 2489
>>ssc-miR-1343	LNC_001096	-34.25	1604
>>ssc-miR-1343	LNC_000499	-25.23	373
>>ssc-miR-1343	LNC_002273	-24.85	13468 2991 7592
>>ssc-miR-1343	LNC_000303	-20.6	456
>>ssc-miR-1343	ALDBSSCT0000001463	-25.62	770
>>ssc-miR-138	LNC_001897	-20.73	1659 1348
>>ssc-miR-1388	LNC_002272	-20.81	3288
>>ssc-miR-1388	LNC_002273	-20.81	11447
>>ssc-miR-139-3p	LNC_001346	-30.22	253
>>ssc-miR-140-3p	LNC_001590	-24.26	288 1283
>>ssc-miR-140-3p	LNC_002276	-28.55	600 1641
>>ssc-miR-140-3p	LNC_001346	-30.93	2142
>>ssc-miR-140-3p	LNC_000236	-25.69	138
>>ssc-miR-140-3p	LNC_001235	-25.66	448
>>ssc-miR-140-3p	LNC_000126	-21.25	84
>>ssc-miR-140-3p	LNC_001300	-21.25	1
>>ssc-miR-140-3p	LNC_000226	-22.56	29
>>ssc-miR-140-3p	LNC_000362	-21.28	31
>>ssc-miR-140-3p	LNC_000338	-21.25	135
>>ssc-miR-140-3p	LNC_001312	-22.56	25
>>ssc-miR-140-3p	LNC_002273	-26.27	8098 8672 1405 5173 1455 5825
>>ssc-miR-140-3p	LNC_000797	-21.25	67
>>ssc-miR-140-3p	LNC_000374	-21.97	482
>>ssc-miR-140-3p	LNC_000926	-21.25	1566
>>ssc-miR-140-3p	LNC_000044	-21.97	106
>>ssc-miR-140-3p	LNC_000629	-21.25	83
>>ssc-miR-140-3p	LNC_000415	-21.56	54
>>ssc-miR-140-3p	LNC_000920	-20.91	94
>>ssc-miR-140-3p	LNC_001493	-21.25	50
>>ssc-miR-140-3p	LNC_002065	-21.25	141
>>ssc-miR-140-3p	ALDBSSCT0000001449	-21.97	342
>>ssc-miR-140-5p	LNC_001995	-21.5	1
>>ssc-miR-142-3p	ALDBSSCT0000001463	-21.45	2713
>>ssc-miR-143-3p	LNC_001110	-21.84	479
>>ssc-miR-143-3p	ALDBSSCT0000001449	-24.05	1
>>ssc-miR-143-5p	LNC_000708	-20.97	848
>>ssc-miR-143-5p	LNC_001678	-21.22	1100
>>ssc-miR-143-5p	LNC_000962	-21.62	913
>>ssc-miR-143-5p	LNC_000415	-21.94	301
>>ssc-miR-143-5p	ALDBSSCT0000003459	-22.64	679
>>ssc-miR-145-3p	LNC_001602	-20.33	1958
>>ssc-miR-145-3p	LNC_000504	-20.74	197
>>ssc-miR-145-3p	LNC_000926	-23.11	914
>>ssc-miR-145-5p	LNC_001432	-23.52	1171
>>ssc-miR-146a-3p	LNC_001602	-21.11	3514
>>ssc-miR-146a-3p	LNC_001217	-21.48	21
>>ssc-miR-146a-3p	LNC_000541	-23.45	410
>>ssc-miR-146a-5p	LNC_002276	-24.51	1363
>>ssc-miR-146a-5p	ALDBSSCT0000009539	-24.41	156
>>ssc-miR-146b	ALDBSSCT0000009539	-26.33	157
>>ssc-miR-148a-3p	ALDBSSCT0000001463	-20.17	1059
>>ssc-miR-148a-5p	LNC_000499	-25.75	902
>>ssc-miR-148b-5p	LNC_000499	-20.47	903
>>ssc-miR-148b-5p	LNC_002273	-20.33	7355
>>ssc-miR-149	LNC_002300	-30.35	134
>>ssc-miR-149	LNC_002272	-27.86	407
>>ssc-miR-149	LNC_001520	-30.35	38 370 1039
>>ssc-miR-149	LNC_001346	-21.28	2011
>>ssc-miR-149	LNC_002308	-29.97	89
>>ssc-miR-149	LNC_000261	-22.33	982
>>ssc-miR-149	LNC_002016	-20.6	708
>>ssc-miR-149	LNC_001374	-26.07	967
>>ssc-miR-149	LNC_001235	-22.76	325 1134
>>ssc-miR-149	LNC_001375	-26.07	850
>>ssc-miR-149	LNC_001711	-24.02	295
>>ssc-miR-149	LNC_001678	-24.6	2475
>>ssc-miR-149	LNC_002450	-24.31	1152
>>ssc-miR-149	LNC_001412	-21.28	1027
>>ssc-miR-149	LNC_000298	-28.23	2584
>>ssc-miR-149	LNC_000303	-24.18	1207
>>ssc-miR-149	ALDBSSCT0000001449	-20.98	140
>>ssc-miR-150	LNC_000994	-23.57	383
>>ssc-miR-150	LNC_002280	-21.94	1278
>>ssc-miR-150	LNC_002308	-20.14	37
>>ssc-miR-150	LNC_000261	-20.98	882
>>ssc-miR-150	LNC_001235	-23.87	2405
>>ssc-miR-150	LNC_002328	-20.19	981
>>ssc-miR-151-3p	LNC_000881	-21.68	397
>>ssc-miR-151-5p	LNC_001346	-20.68	1848 2673
>>ssc-miR-151-5p	LNC_001235	-20.04	987
>>ssc-miR-151-5p	LNC_001678	-20.34	809
>>ssc-miR-151-5p	LNC_002450	-20.86	143
>>ssc-miR-152	LNC_001678	-24.73	2265
>>ssc-miR-15a	LNC_002272	-21.47	3166
>>ssc-miR-15a	LNC_001235	-20.74	2665
>>ssc-miR-15a	LNC_002328	-22.69	302
>>ssc-miR-15a	LNC_002273	-21.47	11325
>>ssc-miR-15b	LNC_002272	-20.78	3165
>>ssc-miR-15b	LNC_000261	-20.16	2211
>>ssc-miR-15b	LNC_001235	-23.58	2664
>>ssc-miR-15b	LNC_002328	-23.77	301
>>ssc-miR-15b	LNC_002001	-21.74	455
>>ssc-miR-15b	LNC_002273	-20.78	4297 11324
>>ssc-miR-16	LNC_002272	-22.14	3163
>>ssc-miR-16	LNC_001235	-22.43	2665
>>ssc-miR-16	LNC_002328	-21.82	305
>>ssc-miR-16	LNC_002273	-22.14	4297 11322
>>ssc-miR-17-3p	LNC_002272	-20.1	5236
>>ssc-miR-17-3p	LNC_002280	-22.65	2363 688
>>ssc-miR-17-3p	LNC_002328	-22.65	2236
>>ssc-miR-17-3p	LNC_001217	-23.16	389
>>ssc-miR-17-3p	LNC_002273	-21.87	4469 13395
>>ssc-miR-17-5p	LNC_002273	-21.39	7697
>>ssc-miR-181b	LNC_000486	-21.76	189
>>ssc-miR-181d-3p	LNC_001346	-27	2367
>>ssc-miR-181d-3p	LNC_001235	-27	681
>>ssc-miR-181d-5p	LNC_000486	-21.76	189
>>ssc-miR-1839-5p	LNC_001897	-23.32	1200
>>ssc-miR-184	LNC_002016	-28.19	519 1255
>>ssc-miR-184	LNC_000504	-23.46	713
>>ssc-miR-184	LNC_000962	-25.01	271
>>ssc-miR-1842	LNC_002272	-25.95	4277
>>ssc-miR-1842	LNC_001602	-25.59	2908
>>ssc-miR-1842	LNC_002277	-27.27	144
>>ssc-miR-1842	LNC_001346	-24.2	3320 2012
>>ssc-miR-1842	LNC_002016	-27.07	710
>>ssc-miR-1842	LNC_001374	-27.27	269 636
>>ssc-miR-1842	LNC_001235	-24.2	1634 2895 326
>>ssc-miR-1842	LNC_001375	-27.27	269 636
>>ssc-miR-1842	LNC_002378	-32.63	62
>>ssc-miR-1842	LNC_002001	-24.89	517
>>ssc-miR-1842	LNC_001217	-25.71	513
>>ssc-miR-1842	LNC_000550	-30.07	39
>>ssc-miR-1842	LNC_000740	-26.03	252
>>ssc-miR-1842	LNC_002273	-25.95	12436
>>ssc-miR-1842	LNC_001441	-26.82	76
>>ssc-miR-1842	LNC_000070	-32.63	60
>>ssc-miR-1842	LNC_000374	-32.63	36
>>ssc-miR-1842	LNC_000926	-24.85	900
>>ssc-miR-1842	LNC_002044	-31.06	191
>>ssc-miR-1842	LNC_000370	-33.65	1
>>ssc-miR-1842	LNC_000303	-26.82	714
>>ssc-miR-185	LNC_001346	-23	1596
>>ssc-miR-185	LNC_002016	-22.66	1
>>ssc-miR-185	LNC_002331	-22.25	291
>>ssc-miR-185	LNC_002450	-23.95	1602
>>ssc-miR-186-3p	LNC_000994	-24.55	1398
>>ssc-miR-186-3p	LNC_001346	-25.69	906
>>ssc-miR-186-3p	ALDBSSCT0000009539	-23.17	301
>>ssc-miR-187	LNC_001346	-23.45	3258
>>ssc-miR-187	LNC_001235	-23.45	1572
>>ssc-miR-187	LNC_001312	-21.58	43
>>ssc-miR-187	LNC_002273	-21.47	5846
>>ssc-miR-187	LNC_000926	-21.58	1582
>>ssc-miR-187	LNC_000044	-26.26	79
>>ssc-miR-18a	LNC_002272	-23.13	2195
>>ssc-miR-18a	LNC_002273	-23.13	10354
>>ssc-miR-18b	LNC_002272	-25.86	2193
>>ssc-miR-18b	LNC_002273	-25.86	10352
>>ssc-miR-193a-3p	LNC_002300	-25.17	18
>>ssc-miR-193a-3p	LNC_001590	-21.56	546
>>ssc-miR-193a-3p	LNC_002276	-22.95	38 838 1138
>>ssc-miR-193a-3p	LNC_002279	-24.93	1191
>>ssc-miR-193a-3p	LNC_000126	-27.24	138
>>ssc-miR-193a-3p	LNC_000226	-23.95	85
>>ssc-miR-193a-3p	LNC_002332	-20.42	40
>>ssc-miR-193a-3p	LNC_000572	-27.24	83
>>ssc-miR-193a-3p	LNC_002273	-27.93	527
>>ssc-miR-193a-5p	LNC_000994	-22.33	2288
>>ssc-miR-193a-5p	LNC_001897	-21.21	799
>>ssc-miR-193a-5p	LNC_001432	-23.34	638
>>ssc-miR-193a-5p	LNC_000298	-26.91	619
>>ssc-miR-194a-3p	LNC_002272	-24.5	2155
>>ssc-miR-194a-3p	LNC_002280	-22.56	2149
>>ssc-miR-194a-3p	LNC_002450	-22.51	499
>>ssc-miR-194a-3p	LNC_002328	-22.56	2023
>>ssc-miR-194a-3p	LNC_001096	-21.17	296
>>ssc-miR-194a-3p	LNC_002273	-24.5	10314
>>ssc-miR-194a-3p	LNC_002449	-20.07	1
>>ssc-miR-194a-3p	LNC_000298	-32.16	3463
>>ssc-miR-194a-3p	LNC_000303	-21.87	1531
>>ssc-miR-194b-3p	LNC_001432	-21.26	1384
>>ssc-miR-194b-3p	LNC_001412	-26.36	805
>>ssc-miR-195	LNC_002272	-23.85	3164
>>ssc-miR-195	LNC_001235	-26.7	2666
>>ssc-miR-195	LNC_002328	-21.38	304
>>ssc-miR-195	LNC_002273	-23.9	11323 4298
>>ssc-miR-196a	LNC_002450	-21.46	799
>>ssc-miR-196b-5p	LNC_002450	-21.37	799
>>ssc-miR-199a-3p	LNC_001602	-20.31	3244
>>ssc-miR-199a-5p	LNC_001096	-20.29	1
>>ssc-miR-199a-5p	LNC_001217	-23.62	2
>>ssc-miR-199a-5p	LNC_001412	-21.39	472
>>ssc-miR-199b-5p	LNC_001217	-22.19	3
>>ssc-miR-202-3p	LNC_000261	-20.69	1587
>>ssc-miR-202-3p	LNC_002279	-23.73	899
>>ssc-miR-205	LNC_000994	-22.63	1898
>>ssc-miR-20b	LNC_002273	-20.69	7697
>>ssc-miR-210	LNC_002280	-21.22	311
>>ssc-miR-210	LNC_001375	-21.92	787
>>ssc-miR-210	LNC_001432	-25.07	552
>>ssc-miR-210	LNC_002328	-21.22	20
>>ssc-miR-212	LNC_002290	-21.11	301
>>ssc-miR-212	LNC_001520	-26.81	366 1004
>>ssc-miR-212	LNC_001374	-20.64	1140
>>ssc-miR-212	LNC_002309	-20.84	306 638
>>ssc-miR-212	LNC_002273	-20.61	7528 418
>>ssc-miR-21-3p	LNC_002308	-28.16	278
>>ssc-miR-21-3p	LNC_001711	-25.96	461
>>ssc-miR-21-3p	LNC_002273	-22.57	4506
>>ssc-miR-214-3p	LNC_000708	-21.4	327
>>ssc-miR-214-3p	LNC_001346	-20.88	1581
>>ssc-miR-214-3p	LNC_000261	-20.85	979
>>ssc-miR-214-3p	LNC_001374	-27.27	834
>>ssc-miR-214-3p	LNC_001432	-23.6	2183 3872
>>ssc-miR-214-3p	LNC_002328	-20.47	2841
>>ssc-miR-214-5p	LNC_002272	-24.36	670
>>ssc-miR-214-5p	LNC_001646	-24.82	364
>>ssc-miR-214-5p	LNC_001432	-27.31	1877 428
>>ssc-miR-214-5p	LNC_001444	-21.28	253
>>ssc-miR-214-5p	LNC_000298	-22.28	649
>>ssc-miR-214-5p	LNC_000303	-21.79	1174
>>ssc-miR-216	LNC_000689	-20.17	464
>>ssc-miR-217	LNC_002273	-21.85	1128
>>ssc-miR-218	LNC_002308	-20.04	389
>>ssc-miR-218	LNC_001096	-20.78	1582
>>ssc-miR-218-3p	LNC_001588	-22.67	263
>>ssc-miR-218-5p	LNC_002308	-20.04	389
>>ssc-miR-218-5p	LNC_001096	-20.78	1582
>>ssc-miR-218b	LNC_002308	-20.04	388
>>ssc-miR-218b	LNC_001096	-20.78	1581
>>ssc-miR-219a	LNC_002309	-20.86	210
>>ssc-miR-221-5p	LNC_001995	-23.84	117
>>ssc-miR-221-5p	LNC_000261	-21.12	1335
>>ssc-miR-221-5p	LNC_002273	-25.33	2761 2586 9086
>>ssc-miR-221-5p	LNC_000187	-22.87	577
>>ssc-miR-222	LNC_000994	-22.92	1120
>>ssc-miR-222	LNC_000374	-22.77	454
>>ssc-miR-22-3p	LNC_002273	-20.5	1471 8688
>>ssc-miR-22-3p	LNC_000374	-20.53	498
>>ssc-miR-22-3p	ALDBSSCT0000001463	-22.74	1412
>>ssc-miR-22-3p	ALDBSSCT0000001449	-20.53	358
>>ssc-miR-224	LNC_001602	-27.28	5567
>>ssc-miR-224	LNC_001646	-22.02	28
>>ssc-miR-224	LNC_001096	-21.44	1
>>ssc-miR-2320-5p	LNC_002276	-28.07	1695
>>ssc-miR-2320-5p	LNC_001602	-24.3	5613
>>ssc-miR-2320-5p	LNC_001346	-21.88	3399
>>ssc-miR-2320-5p	LNC_001374	-24.22	407 676
>>ssc-miR-2320-5p	LNC_001235	-21.88	1713
>>ssc-miR-2320-5p	LNC_001375	-24.22	407 676
>>ssc-miR-2320-5p	LNC_001711	-25.78	368
>>ssc-miR-2320-5p	LNC_000881	-20.51	214
>>ssc-miR-2320-5p	LNC_001678	-21.83	741
>>ssc-miR-2320-5p	LNC_001222	-24.3	108
>>ssc-miR-2320-5p	LNC_002273	-23.92	638 2667 7537
>>ssc-miR-2320-5p	ALDBSSCT0000001463	-30.87	904
>>ssc-miR-2366	LNC_001602	-21.01	2141
>>ssc-miR-2366	LNC_000068	-24.65	732
>>ssc-miR-2366	LNC_001987	-21.05	36
>>ssc-miR-2366	LNC_000499	-30.22	372
>>ssc-miR-2411	LNC_001678	-20.34	754
>>ssc-miR-2411	LNC_002273	-21.17	6655
>>ssc-miR-2411	LNC_000926	-29.12	709
>>ssc-miR-2411	LNC_001110	-23.75	69
>>ssc-miR-24-3p	LNC_002272	-24.73	3344
>>ssc-miR-24-3p	LNC_002277	-22.69	164
>>ssc-miR-24-3p	LNC_000261	-21.25	984
>>ssc-miR-24-3p	LNC_002279	-22.87	169
>>ssc-miR-24-3p	LNC_000236	-24.01	594
>>ssc-miR-24-3p	LNC_001235	-20.87	1134
>>ssc-miR-24-3p	LNC_001678	-21.36	661 520
>>ssc-miR-24-3p	LNC_000740	-21.3	102
>>ssc-miR-24-3p	LNC_002273	-24.73	11503
>>ssc-miR-24-3p	LNC_000298	-22.08	2901 2014
>>ssc-miR-24-3p	ALDBSSCT0000001463	-24.76	2031
>>ssc-miR-26b-3p	LNC_000994	-28.05	65
>>ssc-miR-26b-3p	LNC_001897	-20.63	519
>>ssc-miR-27a	LNC_002273	-20.55	6413
>>ssc-miR-27b-3p	LNC_000068	-21.15	47
>>ssc-miR-27b-3p	LNC_002273	-21.62	6413
>>ssc-miR-296-3p	LNC_002290	-22.74	350
>>ssc-miR-296-3p	LNC_002272	-20.5	4825
>>ssc-miR-296-3p	LNC_002289	-23.23	383 565
>>ssc-miR-296-3p	LNC_001346	-24.78	2656
>>ssc-miR-296-3p	LNC_002016	-21.18	285
>>ssc-miR-296-3p	LNC_001235	-24.78	970
>>ssc-miR-296-3p	LNC_001897	-20.15	42
>>ssc-miR-296-3p	LNC_001432	-21.88	344
>>ssc-miR-296-3p	LNC_002331	-25.43	629
>>ssc-miR-296-3p	LNC_001096	-21.41	437
>>ssc-miR-296-3p	LNC_002273	-20.5	12984
>>ssc-miR-296-5p	LNC_000994	-20.4	917
>>ssc-miR-296-5p	LNC_001520	-25.96	1261
>>ssc-miR-296-5p	LNC_002308	-20.61	266
>>ssc-miR-296-5p	LNC_000261	-21.53	708
>>ssc-miR-296-5p	LNC_001589	-22.67	98 298
>>ssc-miR-296-5p	LNC_001235	-25.34	2745
>>ssc-miR-296-5p	LNC_001432	-25.12	487
>>ssc-miR-296-5p	LNC_001588	-27.11	567 523
>>ssc-miR-296-5p	LNC_002190	-20.62	110
>>ssc-miR-296-5p	LNC_000226	-22.12	293
>>ssc-miR-296-5p	LNC_002273	-32.64	6673
>>ssc-miR-29b	LNC_001346	-21.06	957
>>ssc-miR-30b-3p	LNC_000994	-24.34	2068
>>ssc-miR-30b-3p	LNC_002290	-23.25	1
>>ssc-miR-30b-3p	LNC_002284	-23.25	116
>>ssc-miR-30b-3p	LNC_002272	-20.62	2702 1621
>>ssc-miR-30b-3p	LNC_002289	-23.25	32
>>ssc-miR-30b-3p	LNC_002280	-22.16	2071
>>ssc-miR-30b-3p	LNC_001346	-20.39	1294
>>ssc-miR-30b-3p	LNC_002339	-26.67	547
>>ssc-miR-30b-3p	LNC_002331	-22.64	607
>>ssc-miR-30b-3p	LNC_002450	-22.38	339
>>ssc-miR-30b-3p	LNC_002273	-25.16	2324 5600 10861 9780
>>ssc-miR-30b-3p	ALDBSSCT0000003459	-22.23	45
>>ssc-miR-30b-5p	LNC_000068	-20.11	10
>>ssc-miR-30c-1-3p	LNC_002272	-24.17	1027 2809 4004 2737
>>ssc-miR-30c-1-3p	LNC_001346	-23.34	1600 2934
>>ssc-miR-30c-1-3p	LNC_000261	-25.91	247
>>ssc-miR-30c-1-3p	LNC_001235	-24.42	2977 1248
>>ssc-miR-30c-1-3p	LNC_002337	-24.56	65
>>ssc-miR-30c-1-3p	LNC_002273	-24.09	10968 1953 12163 10896
>>ssc-miR-30c-3p	LNC_002272	-25.47	4002 2735 1025
>>ssc-miR-30c-3p	LNC_001346	-22.37	1595 2933
>>ssc-miR-30c-3p	LNC_000261	-28.19	245
>>ssc-miR-30c-3p	LNC_001235	-22.37	2975 1247
>>ssc-miR-30c-3p	LNC_002337	-21.43	67
>>ssc-miR-30c-3p	LNC_002273	-25.47	12161 1952 10894
>>ssc-miR-30c-5p	LNC_000068	-23.16	11
>>ssc-miR-31	LNC_001432	-20.34	2016
>>ssc-miR-31	LNC_001110	-24.49	339
>>ssc-miR-31	LNC_000303	-20.71	1370
>>ssc-miR-320	LNC_001646	-21.3	267
>>ssc-miR-320	LNC_001432	-24.17	2964
>>ssc-miR-320	ALDBSSCT0000003459	-46.53	438
>>ssc-miR-324	LNC_000504	-20.48	1073
>>ssc-miR-325	LNC_000236	-20.15	429
>>ssc-miR-325	LNC_000298	-21.31	2646
>>ssc-miR-326	LNC_000994	-21.08	2449
>>ssc-miR-326	LNC_002272	-23.73	3891
>>ssc-miR-326	LNC_000261	-27.61	941
>>ssc-miR-326	LNC_002450	-22.01	20
>>ssc-miR-326	LNC_002273	-23.73	12050
>>ssc-miR-326	LNC_000298	-24.08	1466
>>ssc-miR-328	LNC_002300	-32.65	19
>>ssc-miR-328	LNC_002272	-28.66	624
>>ssc-miR-328	LNC_002276	-29.18	2181
>>ssc-miR-328	LNC_001520	-26.51	414 80
>>ssc-miR-328	LNC_001346	-37.76	2772
>>ssc-miR-328	LNC_000236	-29.17	461 181
>>ssc-miR-328	LNC_001235	-37.76	1086
>>ssc-miR-328	LNC_002309	-22.44	137 471
>>ssc-miR-328	LNC_001678	-22.25	2287
>>ssc-miR-328	LNC_002450	-38.77	1335 1010
>>ssc-miR-328	LNC_000226	-20.04	891
>>ssc-miR-328	LNC_002273	-26.04	520
>>ssc-miR-328	LNC_000719	-37.3	109
>>ssc-miR-330	LNC_000994	-23.08	2444
>>ssc-miR-330	LNC_002272	-28.26	3888
>>ssc-miR-330	LNC_002280	-22.37	1
>>ssc-miR-330	LNC_001346	-27.34	509
>>ssc-miR-330	LNC_000261	-31.64	937
>>ssc-miR-330	LNC_002450	-21.45	19 1191
>>ssc-miR-330	LNC_001217	-20.84	67
>>ssc-miR-330	LNC_002273	-28.26	12047 3080
>>ssc-miR-330	LNC_000298	-24.97	1461 808
>>ssc-miR-330	ALDBSSCT0000003459	-23.39	333
>>ssc-miR-331-3p	LNC_000994	-22.89	1636
>>ssc-miR-331-3p	LNC_002276	-26.67	1354 1823
>>ssc-miR-331-3p	LNC_001602	-24.95	419
>>ssc-miR-331-3p	LNC_001520	-21.87	755
>>ssc-miR-331-3p	LNC_001346	-21.27	3645
>>ssc-miR-331-3p	LNC_001374	-25.19	1100
>>ssc-miR-331-3p	LNC_001235	-21.27	1959
>>ssc-miR-331-3p	LNC_002450	-24.64	345
>>ssc-miR-331-3p	LNC_002332	-27.72	25
>>ssc-miR-331-3p	LNC_002273	-22.52	4938
>>ssc-miR-331-3p	LNC_000044	-29.32	123
>>ssc-miR-331-3p	LNC_000298	-24.22	2720
>>ssc-miR-338	LNC_001346	-21.44	1054
>>ssc-miR-338	LNC_001374	-22.31	1313
>>ssc-miR-338	LNC_002279	-20.26	38 385
>>ssc-miR-339	LNC_001602	-23.87	1644
>>ssc-miR-339	LNC_001346	-28.63	1258
>>ssc-miR-339	LNC_000261	-25.8	538 551
>>ssc-miR-339	LNC_001897	-21.43	1516
>>ssc-miR-339	LNC_001432	-23.22	2219
>>ssc-miR-339	LNC_002450	-31.71	1041 634
>>ssc-miR-339	LNC_002273	-27.86	2399 395 7233
>>ssc-miR-339	LNC_000298	-31.87	1964
>>ssc-miR-339-3p	LNC_001590	-31.81	235 1230 1724 632 980 880 1478 285 1280 1773
>>ssc-miR-339-3p	LNC_002280	-21.84	570
>>ssc-miR-339-3p	LNC_000261	-21.83	1532
>>ssc-miR-339-3p	LNC_001235	-26.91	2159
>>ssc-miR-339-3p	LNC_002328	-21.84	280
>>ssc-miR-339-3p	LNC_002273	-22.36	6709 7882
>>ssc-miR-339-3p	ALDBSSCT0000003459	-24.35	490
>>ssc-miR-339-5p	LNC_001602	-23.87	1643
>>ssc-miR-339-5p	LNC_001346	-29.13	1254 3030
>>ssc-miR-339-5p	LNC_000261	-27.49	537 550
>>ssc-miR-339-5p	LNC_001235	-20.23	1344
>>ssc-miR-339-5p	LNC_001897	-21.67	1516
>>ssc-miR-339-5p	LNC_001432	-25.85	2218
>>ssc-miR-339-5p	LNC_002450	-31.71	1040 633
>>ssc-miR-339-5p	LNC_002273	-27.86	2398 394 7232
>>ssc-miR-339-5p	LNC_000298	-31.87	1963
>>ssc-miR-33b-3p	LNC_001602	-20.63	1190
>>ssc-miR-33b-3p	LNC_001646	-26.69	97
>>ssc-miR-33b-3p	LNC_001897	-20.18	1624
>>ssc-miR-33b-5p	ALDBSSCT0000001463	-20.61	924
>>ssc-miR-342	LNC_000261	-24.98	2137
>>ssc-miR-342	LNC_002016	-29.92	83
>>ssc-miR-342	LNC_001432	-22.42	1202
>>ssc-miR-342	LNC_002328	-25.97	2360
>>ssc-miR-345-3p	LNC_002284	-27.25	93
>>ssc-miR-345-3p	LNC_001602	-20.88	1849
>>ssc-miR-345-3p	LNC_002289	-27.25	9
>>ssc-miR-345-3p	LNC_002016	-21.41	1035
>>ssc-miR-345-3p	LNC_001235	-22.18	3028
>>ssc-miR-345-3p	LNC_001432	-26.39	2066
>>ssc-miR-345-3p	LNC_002273	-22.17	470
>>ssc-miR-345-5p	LNC_002450	-23.15	1048
>>ssc-miR-345-5p	LNC_000298	-22.26	302
>>ssc-miR-34a	LNC_000881	-20.12	285
>>ssc-miR-34a	LNC_002331	-21.93	149
>>ssc-miR-361-3p	LNC_000994	-23.28	998
>>ssc-miR-361-3p	LNC_002272	-26.9	32
>>ssc-miR-361-3p	LNC_002276	-20.33	1977
>>ssc-miR-361-3p	LNC_002280	-28.71	257 1414
>>ssc-miR-361-3p	LNC_000261	-23.21	2149 1209 86
>>ssc-miR-361-3p	LNC_000504	-23.85	882
>>ssc-miR-361-3p	LNC_000068	-29.54	868
>>ssc-miR-361-3p	LNC_001235	-21.91	2937
>>ssc-miR-361-3p	LNC_001711	-24.45	87
>>ssc-miR-361-3p	LNC_001432	-24.2	3193 2224
>>ssc-miR-361-3p	LNC_000881	-25	179
>>ssc-miR-361-3p	LNC_000962	-25.59	226
>>ssc-miR-361-3p	LNC_002328	-25.71	1116
>>ssc-miR-361-3p	LNC_001412	-23.7	686 406
>>ssc-miR-361-3p	LNC_000499	-22.01	135
>>ssc-miR-361-3p	LNC_002273	-31.74	7117 4489 7715
>>ssc-miR-362	LNC_002449	-21.2	292
>>ssc-miR-362	ALDBSSCT0000001463	-20.35	679
>>ssc-miR-365-5p	LNC_002272	-27.32	5119
>>ssc-miR-365-5p	LNC_001602	-20.07	4340
>>ssc-miR-365-5p	LNC_002289	-25.44	531
>>ssc-miR-365-5p	LNC_001373	-25.86	487
>>ssc-miR-365-5p	LNC_002273	-27.32	13278
>>ssc-miR-365-5p	LNC_001053	-22.22	98
>>ssc-miR-370	LNC_000994	-20.31	1450
>>ssc-miR-370	LNC_001520	-23.37	356
>>ssc-miR-370	LNC_001346	-24.06	3107
>>ssc-miR-370	LNC_001235	-24.06	1421
>>ssc-miR-370	LNC_001432	-27.49	649 2790
>>ssc-miR-370	LNC_001588	-26.39	88
>>ssc-miR-370	LNC_002273	-29.43	6662 9289 1379 1320 7638
>>ssc-miR-370	LNC_000926	-23.3	79
>>ssc-miR-370	LNC_000298	-23.34	3455 569
>>ssc-miR-371-5p	LNC_002337	-20.81	3
>>ssc-miR-378	LNC_002276	-22.83	1735
>>ssc-miR-378	LNC_002016	-23.1	1567
>>ssc-miR-378	LNC_002349	-20.63	301
>>ssc-miR-378b-3p	LNC_002349	-20.63	302
>>ssc-miR-381-3p	LNC_000719	-20.37	398
>>ssc-miR-381-5p	LNC_000261	-20.33	1054
>>ssc-miR-383	LNC_002286	-20.66	101
>>ssc-miR-383	LNC_000994	-21.58	1980
>>ssc-miR-383	LNC_000708	-21.54	1132
>>ssc-miR-383	LNC_001602	-21.63	790
>>ssc-miR-383	LNC_000504	-23.76	530
>>ssc-miR-383	LNC_002279	-24.76	1130 1177
>>ssc-miR-383	LNC_001678	-26.73	1393
>>ssc-miR-383	LNC_001738	-25.39	196
>>ssc-miR-383	LNC_000126	-26.73	124
>>ssc-miR-383	LNC_001300	-21	38
>>ssc-miR-383	LNC_000572	-22.85	69
>>ssc-miR-383	LNC_000338	-26.45	175
>>ssc-miR-383	LNC_002273	-27.84	198 6266 1450 5215 5864
>>ssc-miR-383	LNC_000797	-25.71	107
>>ssc-miR-383	LNC_001053	-21.73	316
>>ssc-miR-383	LNC_000686	-22.95	29
>>ssc-miR-383	LNC_001536	-25.71	16
>>ssc-miR-383	LNC_000374	-24.72	426
>>ssc-miR-383	LNC_000926	-23.42	161 1606
>>ssc-miR-383	LNC_001110	-24.75	197
>>ssc-miR-383	LNC_000044	-23.24	102
>>ssc-miR-383	LNC_000629	-22.4	123
>>ssc-miR-383	LNC_001587	-20.78	19
>>ssc-miR-383	LNC_000415	-21.77	94
>>ssc-miR-383	LNC_001493	-25.39	90
>>ssc-miR-383	LNC_002065	-25.71	181
>>ssc-miR-383	ALDBSSCT0000001449	-25.66	332
>>ssc-miR-423-3p	LNC_001711	-34.81	4
>>ssc-miR-423-3p	LNC_001588	-27.52	213
>>ssc-miR-423-5p	LNC_002290	-21.35	197
>>ssc-miR-423-5p	LNC_002272	-25.03	4093
>>ssc-miR-423-5p	LNC_002289	-21.35	232
>>ssc-miR-423-5p	LNC_002280	-20.56	1379
>>ssc-miR-423-5p	LNC_001346	-20.29	229
>>ssc-miR-423-5p	LNC_000261	-21.2	228
>>ssc-miR-423-5p	LNC_002016	-29.53	1651
>>ssc-miR-423-5p	LNC_002279	-25.12	322
>>ssc-miR-423-5p	LNC_001235	-21.37	35
>>ssc-miR-423-5p	LNC_001432	-23.34	142
>>ssc-miR-423-5p	LNC_002450	-23.4	1090
>>ssc-miR-423-5p	LNC_002328	-20.56	1081
>>ssc-miR-423-5p	LNC_002273	-25.03	12252
>>ssc-miR-424-5p	LNC_002328	-20.58	306
>>ssc-miR-425-3p	LNC_001520	-21	147
>>ssc-miR-432-3p	LNC_000962	-26.62	81
>>ssc-miR-432-3p	LNC_002273	-25.49	1629
>>ssc-miR-432-5p	LNC_000994	-20.01	1252
>>ssc-miR-432-5p	LNC_000708	-20.46	671
>>ssc-miR-432-5p	LNC_001235	-23.98	2891
>>ssc-miR-432-5p	LNC_001678	-26.06	245 72 1217
>>ssc-miR-432-5p	LNC_000926	-23.04	584
>>ssc-miR-432-5p	ALDBSSCT0000001463	-24.06	1583
>>ssc-miR-4331-3p	LNC_000994	-22.44	332
>>ssc-miR-4331-3p	LNC_002290	-21.91	160
>>ssc-miR-4331-3p	LNC_001602	-42.37	4542 3939
>>ssc-miR-4331-3p	LNC_002289	-21.91	195
>>ssc-miR-4331-3p	LNC_001520	-27.39	620
>>ssc-miR-4331-3p	LNC_002279	-26.42	49
>>ssc-miR-4331-3p	LNC_001711	-42.64	212
>>ssc-miR-4331-3p	LNC_001432	-27.94	1250
>>ssc-miR-4331-3p	LNC_001678	-39.46	1061 368
>>ssc-miR-4331-3p	LNC_002273	-27.67	1876
>>ssc-miR-4331-3p	LNC_000298	-43.8	28
>>ssc-miR-4331-3p	ALDBSSCT0000001463	-31.53	1880
>>ssc-miR-4331-5p	LNC_001235	-20.93	2590
>>ssc-miR-4331-5p	LNC_001711	-25.05	203
>>ssc-miR-4331-5p	LNC_002378	-22.3	54
>>ssc-miR-4331-5p	LNC_001441	-25.34	68
>>ssc-miR-4331-5p	LNC_000070	-22.3	52
>>ssc-miR-4331-5p	LNC_000374	-22.3	28
>>ssc-miR-4331-5p	LNC_002044	-30.57	183
>>ssc-miR-4331-5p	LNC_000303	-25.34	706
>>ssc-miR-4334-3p	LNC_001602	-23.87	1645
>>ssc-miR-4334-3p	LNC_001346	-27.25	1259
>>ssc-miR-4334-3p	LNC_000261	-25.26	539 552
>>ssc-miR-4334-3p	LNC_001432	-21.17	2220
>>ssc-miR-4334-3p	LNC_002450	-27.32	1042 636
>>ssc-miR-4334-3p	LNC_002273	-27.86	2400 396 7234
>>ssc-miR-4334-3p	LNC_000298	-31.24	1966
>>ssc-miR-4334-5p	LNC_000994	-33.35	2306 2160 1388
>>ssc-miR-4334-5p	LNC_001346	-31.68	2418
>>ssc-miR-4334-5p	LNC_000261	-20.27	399
>>ssc-miR-4334-5p	LNC_001897	-23.83	1590
>>ssc-miR-4334-5p	LNC_001432	-27.12	2343
>>ssc-miR-4334-5p	LNC_001678	-21.43	2321
>>ssc-miR-4334-5p	LNC_001412	-31.88	28
>>ssc-miR-4335	LNC_002272	-22.13	4685
>>ssc-miR-4335	LNC_001602	-31.53	982
>>ssc-miR-4335	LNC_001520	-21.57	1270
>>ssc-miR-4335	LNC_001346	-26.71	2033 3583
>>ssc-miR-4335	LNC_001235	-26.71	347 1897 2770
>>ssc-miR-4335	LNC_001432	-23.25	3820
>>ssc-miR-4335	LNC_002273	-26.07	6873 6441 4644 12844
>>ssc-miR-4339	LNC_000994	-20.03	602
>>ssc-miR-4339	LNC_001235	-25.41	3011
>>ssc-miR-4339	LNC_000298	-25.38	1220
>>ssc-miR-4339	LNC_000370	-24.97	272
>>ssc-miR-450b-3p	LNC_001711	-25.27	347
>>ssc-miR-450b-3p	LNC_000187	-21.76	526
>>ssc-miR-452	LNC_001432	-24.65	2058
>>ssc-miR-454	LNC_001678	-20.52	2381
>>ssc-miR-455-3p	LNC_002016	-21.92	1315
>>ssc-miR-455-5p	LNC_000298	-24.1	1469
>>ssc-miR-484	LNC_000994	-27.84	313
>>ssc-miR-484	LNC_002272	-28.37	2727 4836
>>ssc-miR-484	LNC_001602	-21.39	1821
>>ssc-miR-484	LNC_001346	-33.8	2045
>>ssc-miR-484	LNC_000261	-29.69	1 1188 1404 1005
>>ssc-miR-484	LNC_002016	-21.49	843
>>ssc-miR-484	LNC_000236	-24.44	346
>>ssc-miR-484	LNC_001235	-33.8	359 2654
>>ssc-miR-484	LNC_001588	-29.3	32
>>ssc-miR-484	LNC_000881	-32.5	180
>>ssc-miR-484	LNC_002328	-29.22	2564 2948
>>ssc-miR-484	LNC_001412	-30.99	730
>>ssc-miR-484	LNC_000499	-24.73	136
>>ssc-miR-484	LNC_001373	-33.96	341
>>ssc-miR-484	LNC_002273	-28.37	5788 10886 12995 4489
>>ssc-miR-484	LNC_000303	-22.98	1192
>>ssc-miR-486	LNC_002273	-22.41	7017
>>ssc-miR-487b	ALDBSSCT0000001449	-20.86	52
>>ssc-miR-490	LNC_002190	-24.71	485
>>ssc-miR-490	LNC_001678	-23.78	2322 871
>>ssc-miR-490	LNC_001222	-21.95	258 214
>>ssc-miR-490-3p	LNC_002190	-24.71	485
>>ssc-miR-490-3p	LNC_001678	-23.78	2322 871
>>ssc-miR-490-3p	LNC_001222	-21.95	258 214
>>ssc-miR-490-5p	LNC_000994	-24.97	1565
>>ssc-miR-490-5p	LNC_002016	-24.03	253
>>ssc-miR-490-5p	LNC_000504	-22.24	205 614
>>ssc-miR-490-5p	LNC_001235	-26.59	444
>>ssc-miR-490-5p	LNC_002450	-32.76	1613
>>ssc-miR-490-5p	LNC_002273	-20.83	6784
>>ssc-miR-491	LNC_000994	-23	3139
>>ssc-miR-491	LNC_002280	-20.54	2109
>>ssc-miR-491	LNC_002328	-23.45	1865 1983
>>ssc-miR-491	LNC_000298	-21.56	3464
>>ssc-miR-493-3p	LNC_000068	-22.93	291
>>ssc-miR-493-3p	LNC_001432	-20.72	2031
>>ssc-miR-493-3p	LNC_002450	-20.02	887
>>ssc-miR-497	LNC_000994	-20.31	817
>>ssc-miR-497	LNC_002272	-27.77	3164
>>ssc-miR-497	LNC_001235	-23.95	2665
>>ssc-miR-497	LNC_002328	-20.73	302
>>ssc-miR-497	LNC_000226	-20.13	719
>>ssc-miR-497	LNC_002273	-27.77	11323
>>ssc-miR-500-3p	LNC_002345	-22.82	263
>>ssc-miR-500-3p	LNC_002273	-24.91	2206 8159
>>ssc-miR-500-5p	LNC_002449	-23.65	286
>>ssc-miR-503	LNC_001520	-26.18	201
>>ssc-miR-503	LNC_001346	-20.43	539
>>ssc-miR-503	LNC_002016	-21.21	499
>>ssc-miR-503	LNC_000926	-29.37	603
>>ssc-miR-503	LNC_000298	-28.72	783
>>ssc-miR-504	LNC_001590	-20.69	1037
>>ssc-miR-504	LNC_002272	-26.79	1137
>>ssc-miR-504	LNC_002276	-22.2	1737
>>ssc-miR-504	LNC_001346	-22.93	829 2476
>>ssc-miR-504	LNC_000068	-25.47	121
>>ssc-miR-504	LNC_001235	-20.81	790
>>ssc-miR-504	LNC_000187	-24.89	324
>>ssc-miR-505	LNC_001590	-20.67	991
>>ssc-miR-505	LNC_001432	-21.41	4217
>>ssc-miR-532-3p	LNC_002272	-28.87	57 534
>>ssc-miR-532-3p	LNC_001346	-30.33	2265
>>ssc-miR-532-3p	LNC_002016	-22.93	1359
>>ssc-miR-532-3p	LNC_000504	-20.83	865
>>ssc-miR-532-3p	LNC_001374	-27.75	1414
>>ssc-miR-532-3p	LNC_001235	-30.33	579
>>ssc-miR-532-3p	LNC_001432	-22.66	719
>>ssc-miR-532-3p	LNC_002450	-26.69	986
>>ssc-miR-532-5p	LNC_001588	-21.94	15
>>ssc-miR-532-5p	LNC_000881	-30.79	70
>>ssc-miR-532-5p	LNC_002332	-20.07	506
>>ssc-miR-532-5p	LNC_000298	-20.63	523
>>ssc-miR-532-5p	LNC_000303	-25.22	410
>>ssc-miR-532-5p	ALDBSSCT0000001463	-22.33	852
>>ssc-miR-542-3p	LNC_002272	-20.29	646
>>ssc-miR-542-5p	LNC_001235	-24.1	104
>>ssc-miR-551a	LNC_001590	-24.61	1086
>>ssc-miR-551a	LNC_001346	-22.08	1213
>>ssc-miR-551a	LNC_001432	-23	2591
>>ssc-miR-551a	LNC_001053	-20.2	121
>>ssc-miR-574-3p	LNC_000298	-24.9	1093
>>ssc-miR-574-5p	LNC_002272	-20.06	4082
>>ssc-miR-574-5p	LNC_001602	-20.14	4919
>>ssc-miR-574-5p	LNC_002450	-21.37	1718
>>ssc-miR-574-5p	LNC_001217	-20.01	531
>>ssc-miR-574-5p	LNC_002273	-20.06	12241 5560
>>ssc-miR-574-5p	LNC_000298	-22.05	975
>>ssc-miR-574-5p	LNC_000920	-39.15	260
>>ssc-miR-582-5p	LNC_002280	-27.44	679
>>ssc-miR-615	LNC_002345	-26.46	110
>>ssc-miR-615	LNC_002276	-35.74	1086 386 436
>>ssc-miR-615	LNC_000261	-29.19	1095
>>ssc-miR-615	LNC_000504	-24.57	1056
>>ssc-miR-615	LNC_001987	-31.24	22
>>ssc-miR-615	LNC_001738	-23.22	181
>>ssc-miR-615	LNC_000126	-25.01	109
>>ssc-miR-615	LNC_002001	-22.17	198
>>ssc-miR-615	LNC_000572	-25.01	54
>>ssc-miR-615	LNC_000362	-24.35	56
>>ssc-miR-615	LNC_000338	-25.01	160
>>ssc-miR-615	LNC_001312	-22.96	52
>>ssc-miR-615	LNC_000797	-25.01	92
>>ssc-miR-615	LNC_000926	-22.96	1591
>>ssc-miR-615	LNC_001493	-25.01	75
>>ssc-miR-615	LNC_002065	-25.01	166
>>ssc-miR-628-5p	LNC_002016	-21.88	1922
>>ssc-miR-652	LNC_001346	-22.62	1727
>>ssc-miR-652	LNC_000504	-27.41	1332
>>ssc-miR-652	LNC_002309	-21.69	675
>>ssc-miR-652	LNC_002273	-22.1	1676
>>ssc-miR-6529	LNC_000689	-23.88	52
>>ssc-miR-660	LNC_002272	-24.72	2069
>>ssc-miR-660	LNC_002337	-23.7	458
>>ssc-miR-660	LNC_002273	-24.72	10228
>>ssc-miR-664-5p	LNC_001432	-23.47	1905 3309
>>ssc-miR-664-5p	LNC_001678	-27.21	1439
>>ssc-miR-664-5p	LNC_001738	-26.64	242
>>ssc-miR-664-5p	LNC_000126	-26.7	170
>>ssc-miR-664-5p	LNC_001300	-22.69	84
>>ssc-miR-664-5p	LNC_001412	-25.91	404
>>ssc-miR-664-5p	LNC_000572	-21.39	112
>>ssc-miR-664-5p	LNC_000033	-26.64	37
>>ssc-miR-664-5p	LNC_001444	-27.27	113
>>ssc-miR-664-5p	LNC_000362	-25.24	117
>>ssc-miR-664-5p	LNC_000338	-22.5	221
>>ssc-miR-664-5p	LNC_001312	-25.91	113
>>ssc-miR-664-5p	LNC_002273	-27.21	5916 8713 244 5261 8135 1493
>>ssc-miR-664-5p	LNC_000797	-27.02	153
>>ssc-miR-664-5p	LNC_000686	-27.08	75
>>ssc-miR-664-5p	LNC_001536	-26.64	62
>>ssc-miR-664-5p	LNC_000374	-21.39	520
>>ssc-miR-664-5p	LNC_000044	-20.46	148
>>ssc-miR-664-5p	LNC_000298	-20.26	1721
>>ssc-miR-664-5p	LNC_000629	-25.97	169
>>ssc-miR-664-5p	LNC_001587	-27.62	65
>>ssc-miR-664-5p	LNC_000415	-20.99	265
>>ssc-miR-664-5p	LNC_001493	-27.02	136
>>ssc-miR-664-5p	LNC_002065	-26.64	227
>>ssc-miR-670	LNC_002272	-22.08	3235
>>ssc-miR-670	LNC_002273	-22.08	11394
>>ssc-miR-671-3p	LNC_001590	-25.17	867
>>ssc-miR-671-3p	ALDBSSCT0000003459	-25.14	460
>>ssc-miR-671-5p	LNC_000994	-35.9	401 822
>>ssc-miR-671-5p	LNC_002272	-28.34	2891
>>ssc-miR-671-5p	LNC_001602	-30.38	3325 3716
>>ssc-miR-671-5p	LNC_002016	-29.02	597
>>ssc-miR-671-5p	LNC_001432	-30.63	5012
>>ssc-miR-671-5p	LNC_002331	-25.03	265
>>ssc-miR-671-5p	LNC_001412	-40.66	883
>>ssc-miR-671-5p	LNC_002273	-28.34	11050
>>ssc-miR-6782-3p	LNC_001590	-34.24	846
>>ssc-miR-6782-3p	LNC_001346	-28.01	2985
>>ssc-miR-6782-3p	LNC_000261	-24.04	2220
>>ssc-miR-6782-3p	LNC_000236	-27.46	703
>>ssc-miR-6782-3p	LNC_001235	-28.01	1299
>>ssc-miR-708-3p	LNC_000797	-20.65	241
>>ssc-miR-708-5p	LNC_001346	-25.32	1845
>>ssc-miR-7134-5p	LNC_001588	-25.83	379
>>ssc-miR-7135-3p	LNC_002272	-24.39	3930
>>ssc-miR-7135-3p	LNC_002016	-22.08	1671
>>ssc-miR-7135-3p	LNC_002273	-24.39	12089
>>ssc-miR-7135-3p	LNC_000298	-26.09	2199
>>ssc-miR-7135-3p	LNC_000719	-21.33	165
>>ssc-miR-7135-5p	LNC_002280	-23.68	901
>>ssc-miR-7135-5p	LNC_001374	-23.69	631
>>ssc-miR-7135-5p	LNC_001375	-23.69	631
>>ssc-miR-7135-5p	LNC_002328	-25.19	609
>>ssc-miR-7135-5p	LNC_002273	-26.95	7909
>>ssc-miR-7135-5p	LNC_000298	-20.97	1355
>>ssc-miR-7135-5p	LNC_000370	-20.53	274
>>ssc-miR-7136-3p	LNC_001602	-20.31	1193
>>ssc-miR-7136-3p	ALDBSSCT0000001463	-20.56	2866
>>ssc-miR-7136-5p	LNC_000708	-20.45	635
>>ssc-miR-7136-5p	LNC_002276	-27.15	1163 1063 1812
>>ssc-miR-7136-5p	LNC_002280	-23.78	1034
>>ssc-miR-7136-5p	LNC_001374	-22.87	1078
>>ssc-miR-7136-5p	LNC_000962	-22.59	66
>>ssc-miR-7136-5p	LNC_002328	-23.78	742
>>ssc-miR-7136-5p	LNC_000298	-27.7	361 2931
>>ssc-miR-7137-3p	LNC_001590	-34.7	1783 793 939 294 497 1289 1647 397 596
>>ssc-miR-7137-3p	LNC_002272	-20.34	4173
>>ssc-miR-7137-3p	LNC_002276	-29.02	116 1065 1913 2012 2062 58 16 265 465 1614 1162 1811 515 2151 612 712 1711
>>ssc-miR-7137-3p	LNC_002280	-23.4	1030
>>ssc-miR-7137-3p	LNC_001646	-26.91	411 464
>>ssc-miR-7137-3p	LNC_001374	-26.51	1080
>>ssc-miR-7137-3p	LNC_002328	-23.4	738
>>ssc-miR-7137-3p	LNC_002273	-25.85	12332 7889
>>ssc-miR-7137-3p	LNC_000298	-28.29	2924
>>ssc-miR-7137-3p	ALDBSSCT0000001463	-28.7	671
>>ssc-miR-7137-5p	LNC_001346	-21.61	3514
>>ssc-miR-7137-5p	LNC_001235	-21.61	1828
>>ssc-miR-7138-3p	LNC_001346	-20.83	2647
>>ssc-miR-7138-3p	LNC_001235	-20.83	961
>>ssc-miR-7138-3p	LNC_002450	-24.33	59
>>ssc-miR-7138-3p	LNC_002332	-26.5	359
>>ssc-miR-7138-3p	LNC_002273	-23.56	8958
>>ssc-miR-7138-3p	LNC_000298	-20.93	1481
>>ssc-miR-7138-5p	LNC_001520	-28	1256 256 925 590
>>ssc-miR-7138-5p	LNC_001346	-31.04	805
>>ssc-miR-7138-5p	LNC_002308	-23.57	305
>>ssc-miR-7138-5p	LNC_002016	-26.78	1366
>>ssc-miR-7138-5p	LNC_001432	-21.9	1
>>ssc-miR-7138-5p	LNC_001678	-23.5	498
>>ssc-miR-7138-5p	LNC_002273	-26.27	149
>>ssc-miR-7138-5p	ALDBSSCT0000001449	-22.92	289
>>ssc-miR-7139-3p	LNC_001346	-28.65	2402 1394 977
>>ssc-miR-7139-3p	LNC_001589	-21.7	1
>>ssc-miR-7139-3p	LNC_001235	-26.93	717
>>ssc-miR-7139-3p	LNC_001897	-27.78	1168
>>ssc-miR-7139-3p	LNC_002273	-30.28	7538 641
>>ssc-miR-7139-3p	LNC_000298	-34.88	3548
>>ssc-miR-7139-5p	LNC_002272	-20.08	4359
>>ssc-miR-7139-5p	LNC_002332	-25.54	399 194
>>ssc-miR-7139-5p	LNC_002273	-22.28	1330 12518
>>ssc-miR-7140-3p	LNC_000236	-20.28	688
>>ssc-miR-7142-5p	LNC_001346	-33.27	84 3277
>>ssc-miR-7142-5p	LNC_002016	-26.45	701
>>ssc-miR-7142-5p	LNC_000926	-28.4	1133
>>ssc-miR-7143-3p	LNC_001602	-20.55	3817
>>ssc-miR-7143-3p	LNC_002337	-24.15	77
>>ssc-miR-7143-3p	LNC_002273	-24	2261
>>ssc-miR-7143-3p	LNC_001536	-20.16	223
>>ssc-miR-7143-3p	LNC_001241	-22.52	278
>>ssc-miR-7143-3p	ALDBSSCT0000001463	-23.18	1403
>>ssc-miR-7143-5p	LNC_002272	-20.49	5104
>>ssc-miR-7143-5p	LNC_001520	-21.29	900
>>ssc-miR-7143-5p	LNC_001346	-24.64	1516
>>ssc-miR-7143-5p	LNC_001432	-20.58	4650
>>ssc-miR-7143-5p	LNC_001096	-24.43	2112
>>ssc-miR-7143-5p	LNC_001373	-24.46	524
>>ssc-miR-7143-5p	LNC_002273	-20.49	13263
>>ssc-miR-7143-5p	LNC_001053	-20.05	304
>>ssc-miR-7144-3p	LNC_001590	-24.25	81 1076
>>ssc-miR-7144-3p	LNC_002272	-21.55	3265
>>ssc-miR-7144-3p	LNC_002276	-21.87	501
>>ssc-miR-7144-3p	LNC_001520	-25.09	1007 1038 367
>>ssc-miR-7144-3p	LNC_002309	-22.28	641
>>ssc-miR-7144-3p	LNC_002273	-23.86	6445 11424
>>ssc-miR-7144-5p	LNC_001602	-20.62	3634
>>ssc-miR-7144-5p	LNC_000261	-20.04	607
>>ssc-miR-7144-5p	LNC_001589	-30.43	175 225
>>ssc-miR-7144-5p	LNC_002309	-23.42	205
>>ssc-miR-7144-5p	LNC_001588	-30.44	549
>>ssc-miR-7144-5p	LNC_002273	-23.87	6624
>>ssc-miR-7144-5p	LNC_000303	-20.29	1247
>>ssc-miR-744	LNC_002280	-23.59	2526
>>ssc-miR-744	LNC_000261	-24.47	1138
>>ssc-miR-744	LNC_002016	-25.08	484
>>ssc-miR-744	LNC_001374	-30.01	1365
>>ssc-miR-744	LNC_000236	-23.67	1
>>ssc-miR-744	LNC_001432	-28.4	36
>>ssc-miR-744	LNC_000962	-22.08	329
>>ssc-miR-744	LNC_002328	-28.1	2525 2555 2730 2970 2403 2465 2584 2675 3031 2850 2935
>>ssc-miR-744	LNC_000926	-27.39	1140
>>ssc-miR-769-3p	LNC_002290	-25.88	385
>>ssc-miR-769-3p	LNC_000708	-21.77	586
>>ssc-miR-769-3p	LNC_002289	-25.88	418
>>ssc-miR-769-3p	LNC_000504	-22.08	1244
>>ssc-miR-769-3p	LNC_002279	-26.67	126
>>ssc-miR-769-3p	LNC_002273	-20.55	2112
>>ssc-miR-769-5p	LNC_000236	-20.04	8
>>ssc-miR-769-5p	LNC_002450	-22.54	531
>>ssc-miR-7857-3p	LNC_002273	-20.59	6526
>>ssc-miR-874	LNC_000261	-36.81	718
>>ssc-miR-874	LNC_000504	-28.3	1362
>>ssc-miR-874	LNC_001374	-21.99	558
>>ssc-miR-874	LNC_001235	-25.91	2174 3026
>>ssc-miR-874	LNC_001897	-21.57	195 1589
>>ssc-miR-874	LNC_001375	-21.99	558
>>ssc-miR-874	LNC_001217	-25.07	392
>>ssc-miR-874	LNC_002273	-26.32	7653 940 2935 4786
>>ssc-miR-874	ALDBSSCT0000003459	-28.34	121
>>ssc-miR-874	ALDBSSCT0000001463	-20.07	633
>>ssc-miR-885-3p	LNC_002272	-24.19	120
>>ssc-miR-885-3p	LNC_002289	-25.39	485
>>ssc-miR-885-3p	LNC_001346	-27.33	3338 1172
>>ssc-miR-885-3p	LNC_001235	-27.33	3128 1652
>>ssc-miR-885-3p	LNC_002328	-27.21	2511 2540 2806
>>ssc-miR-885-3p	LNC_002273	-24.19	9441
>>ssc-miR-92b-5p	LNC_002016	-29.71	1256
>>ssc-miR-92b-5p	LNC_000504	-21.05	711
>>ssc-miR-92b-5p	LNC_001432	-30.6	194
>>ssc-miR-96-5p	LNC_002449	-21.07	322
>>ssc-miR-9785-5p	LNC_000708	-22.04	505
>>ssc-miR-9785-5p	LNC_000881	-25.21	100
>>ssc-miR-9785-5p	LNC_002450	-30.3	517
>>ssc-miR-9785-5p	LNC_000926	-27.42	110
>>ssc-miR-9785-5p	LNC_000719	-23.97	108
>>ssc-miR-9786-3p	LNC_002276	-21.22	1019
>>ssc-miR-9787-3p	LNC_001346	-24.35	693
>>ssc-miR-9788-3p	LNC_002290	-21.96	365
>>ssc-miR-9788-3p	LNC_002289	-21.96	398
>>ssc-miR-9788-3p	LNC_002309	-21.23	549
>>ssc-miR-9788-3p	LNC_002450	-23.28	256 141
>>ssc-miR-9788-3p	LNC_002273	-22.59	1730
>>ssc-miR-9791-3p	LNC_002272	-20.26	3984
>>ssc-miR-9791-3p	LNC_002279	-21.12	856
>>ssc-miR-9791-3p	LNC_002273	-20.26	12143
>>ssc-miR-9792-5p	LNC_002272	-24.03	1221
>>ssc-miR-9792-5p	LNC_000962	-20.55	88
>>ssc-miR-9792-5p	LNC_001110	-20.89	348
>>ssc-miR-9793-5p	LNC_002337	-27.22	477
>>ssc-miR-9793-5p	LNC_001412	-21.3	608
>>ssc-miR-9794-3p	LNC_001602	-21.48	3142
>>ssc-miR-9796-3p	LNC_001520	-22.85	816
>>ssc-miR-9796-3p	LNC_002308	-22.79	194
>>ssc-miR-9796-3p	LNC_000261	-23.62	1930
>>ssc-miR-9796-3p	LNC_001589	-24.03	222
>>ssc-miR-9796-3p	LNC_001432	-27.04	2774
>>ssc-miR-9796-3p	LNC_000298	-22.34	3441
>>ssc-miR-9797-3p	LNC_001373	-22.69	32
>>ssc-miR-9798-3p	LNC_002292	-24.52	1401 132 103 1006 1123 1199 201 321 555 61 280 1169 1242
>>ssc-miR-9798-3p	LNC_002323	-20.63	174
>>ssc-miR-9798-3p	LNC_001602	-21.56	3962
>>ssc-miR-9798-3p	LNC_002279	-27.81	103
>>ssc-miR-9798-3p	LNC_002273	-20.59	4312
>>ssc-miR-9798-3p	LNC_001241	-24.66	13
>>ssc-miR-9802-3p	LNC_002272	-27.38	3966 4490
>>ssc-miR-9802-3p	LNC_002273	-27.38	12125 4727 1986 12649
>>ssc-miR-9803-5p	LNC_000994	-25.02	2119
>>ssc-miR-9803-5p	LNC_002272	-20.71	4539
>>ssc-miR-9803-5p	LNC_002273	-20.71	12698
>>ssc-miR-9804-5p	LNC_001432	-20.39	812
>>ssc-miR-9804-5p	LNC_000881	-22.63	329
>>ssc-miR-9804-5p	LNC_001678	-22.46	304
>>ssc-miR-9805-3p	LNC_002280	-27.05	1417
>>ssc-miR-9805-3p	LNC_002016	-25.86	944
>>ssc-miR-9805-3p	LNC_001235	-28.64	2277 2766
>>ssc-miR-9805-3p	LNC_001588	-28	466
>>ssc-miR-9805-3p	LNC_002190	-25.16	170
>>ssc-miR-9805-3p	LNC_002328	-27.05	1119
>>ssc-miR-9805-3p	LNC_002273	-32.91	6621
>>ssc-miR-9805-3p	LNC_000926	-24.59	1335
>>ssc-miR-9806-5p	LNC_000261	-26.91	1322
>>ssc-miR-9806-5p	LNC_001897	-20.29	569
>>ssc-miR-9807-5p	LNC_001222	-21.94	244
>>ssc-miR-9808-3p	LNC_002292	-22.31	1042
>>ssc-miR-9808-3p	LNC_002272	-24.96	240
>>ssc-miR-9808-3p	LNC_002273	-24.96	9561
>>ssc-miR-9808-3p	LNC_000926	-24.87	1404
>>ssc-miR-9809-3p	LNC_000994	-20.64	1135
>>ssc-miR-9810-3p	LNC_001374	-29.84	1439
>>ssc-miR-9810-3p	LNC_001235	-23.25	1183
>>ssc-miR-9811-5p	LNC_002276	-22.54	117
>>ssc-miR-9811-5p	LNC_001346	-31.27	2735 213
>>ssc-miR-9811-5p	LNC_002016	-21.87	722
>>ssc-miR-9811-5p	LNC_001374	-24.08	1400
>>ssc-miR-9811-5p	LNC_001235	-26.09	1049
>>ssc-miR-9811-5p	LNC_001432	-24	229 182
>>ssc-miR-9811-5p	LNC_002190	-26.5	473
>>ssc-miR-9811-5p	LNC_000926	-28.64	573
>>ssc-miR-9811-5p	LNC_000298	-23.23	1505
>>ssc-miR-9812-3p	LNC_001346	-28.97	2006
>>ssc-miR-9812-3p	LNC_001235	-28.97	320
>>ssc-miR-9813-5p	LNC_000962	-21.55	259 1
>>ssc-miR-9816-3p	LNC_002337	-26.1	289
>>ssc-miR-9816-3p	LNC_001678	-26.76	2201 2135
>>ssc-miR-9816-3p	LNC_001222	-25.86	255
>>ssc-miR-9816-3p	LNC_002273	-20.88	882
>>ssc-miR-9819-5p	LNC_000994	-20.72	365
>>ssc-miR-9819-5p	LNC_001110	-24.22	163
>>ssc-miR-9820-5p	LNC_000994	-22.15	1361 1257
>>ssc-miR-9820-5p	LNC_002272	-30.37	1499 2802 1009
>>ssc-miR-9820-5p	LNC_002280	-25.37	629
>>ssc-miR-9820-5p	LNC_001346	-27.34	703 2995
>>ssc-miR-9820-5p	LNC_000504	-23.86	1017
>>ssc-miR-9820-5p	LNC_001235	-27.71	1309 2107
>>ssc-miR-9820-5p	LNC_001678	-27.06	69
>>ssc-miR-9820-5p	LNC_002450	-32.65	260 1273
>>ssc-miR-9820-5p	LNC_002328	-26.29	339 1755
>>ssc-miR-9820-5p	LNC_001096	-27.56	186
>>ssc-miR-9820-5p	LNC_002273	-30.37	9658 10961
>>ssc-miR-9821-5p	LNC_001602	-20.68	417
>>ssc-miR-9822-3p	LNC_001602	-20.01	414
>>ssc-miR-9822-3p	ALDBSSCT0000001463	-21.07	2059
>>ssc-miR-9824-5p	LNC_002284	-32.16	62 208
>>ssc-miR-9824-5p	LNC_000261	-29.46	268 1590
>>ssc-miR-9824-5p	LNC_000504	-30.71	153
>>ssc-miR-9824-5p	LNC_002273	-23.72	9167 9147
>>ssc-miR-9825-5p	LNC_002290	-20.87	395
>>ssc-miR-9825-5p	LNC_002272	-25.04	3961
>>ssc-miR-9825-5p	LNC_001602	-20.08	1764
>>ssc-miR-9825-5p	LNC_002289	-20.87	428
>>ssc-miR-9825-5p	LNC_002280	-22.69	1981
>>ssc-miR-9825-5p	LNC_001346	-20.19	3120
>>ssc-miR-9825-5p	LNC_001235	-20.19	1434
>>ssc-miR-9825-5p	LNC_002328	-22.47	1683
>>ssc-miR-9825-5p	LNC_002273	-25.04	12120
>>ssc-miR-9827-5p	LNC_002309	-21.01	276
>>ssc-miR-9828-3p	LNC_001590	-21.69	137 1132
>>ssc-miR-9828-3p	LNC_002280	-20.29	1250
>>ssc-miR-9828-3p	LNC_000962	-25.19	439
>>ssc-miR-9828-3p	LNC_001096	-22.52	117
>>ssc-miR-9829-5p	LNC_002300	-21.58	66
>>ssc-miR-9829-5p	LNC_002450	-21.13	173
>>ssc-miR-9829-5p	LNC_002328	-28.75	2787
>>ssc-miR-9830-5p	LNC_002272	-20.71	4481
>>ssc-miR-9830-5p	LNC_002280	-20.32	1723
>>ssc-miR-9830-5p	LNC_002308	-22.06	219
>>ssc-miR-9830-5p	LNC_001897	-23.81	827
>>ssc-miR-9830-5p	LNC_001432	-21.83	2467
>>ssc-miR-9830-5p	LNC_002328	-20.32	1425
>>ssc-miR-9830-5p	LNC_002273	-20.71	12640
>>ssc-miR-9831-3p	LNC_002280	-35.45	638
>>ssc-miR-9831-3p	LNC_002328	-35.45	348
>>ssc-miR-9831-3p	LNC_001412	-20.71	540
>>ssc-miR-9832-3p	LNC_002273	-23.49	3113
>>ssc-miR-9835-3p	LNC_002290	-21.74	239
>>ssc-miR-9835-3p	LNC_002289	-21.74	273
>>ssc-miR-9835-3p	LNC_000261	-22.38	1758
>>ssc-miR-9835-3p	LNC_002016	-22.79	1260
>>ssc-miR-9835-3p	LNC_000504	-22.11	718 263
>>ssc-miR-9835-3p	LNC_001235	-26.33	2118
>>ssc-miR-9835-3p	LNC_002450	-24.18	1105
>>ssc-miR-9835-3p	LNC_002001	-25.03	118
>>ssc-miR-9835-3p	LNC_001373	-20.61	488
>>ssc-miR-9835-3p	LNC_002273	-23.25	3572 5508
>>ssc-miR-9836-3p	LNC_002277	-21.08	586
>>ssc-miR-9838-5p	LNC_002280	-21.01	259
>>ssc-miR-9838-5p	LNC_001110	-21.2	134
>>ssc-miR-9838-5p	ENSSSCT00000037405	-25.54	12
>>ssc-miR-9839-5p	LNC_000994	-20.99	1458
>>ssc-miR-9839-5p	LNC_001602	-20.51	1385
>>ssc-miR-9839-5p	LNC_001096	-23.8	1094
>>ssc-miR-9840-3p	LNC_002280	-25.18	1953
>>ssc-miR-9840-3p	LNC_000261	-22.4	1941
>>ssc-miR-9840-3p	LNC_002016	-22.1	387
>>ssc-miR-9840-3p	LNC_002328	-25.18	1655
>>ssc-miR-9840-3p	LNC_000719	-21.47	278
>>ssc-miR-9841-3p	LNC_001602	-23.15	5261
>>ssc-miR-9841-3p	LNC_001897	-20.8	163
>>ssc-miR-9842-5p	LNC_002272	-27.65	2997 1655
>>ssc-miR-9842-5p	LNC_001602	-23.54	2
>>ssc-miR-9842-5p	LNC_001346	-22.09	986
>>ssc-miR-9842-5p	LNC_000261	-23.64	839
>>ssc-miR-9842-5p	LNC_001374	-22.35	720
>>ssc-miR-9842-5p	LNC_001375	-22.35	720
>>ssc-miR-9842-5p	LNC_000962	-21.93	888
>>ssc-miR-9842-5p	LNC_002450	-20.14	1381
>>ssc-miR-9842-5p	LNC_001373	-22.52	528
>>ssc-miR-9842-5p	LNC_002273	-27.65	11156 1704 9814
>>ssc-miR-9842-5p	LNC_001110	-24.58	93
>>ssc-miR-9842-5p	LNC_000298	-21.36	2012
>>ssc-miR-9842-5p	LNC_000415	-22.29	47
>>ssc-miR-9843-3p	LNC_002272	-21.66	110
>>ssc-miR-9843-3p	LNC_000068	-21.95	851
>>ssc-miR-9843-3p	LNC_002273	-21.66	9431
>>ssc-miR-9845-5p	LNC_002279	-23.24	1085
>>ssc-miR-9845-5p	LNC_001412	-26.3	732
>>ssc-miR-9845-5p	LNC_000415	-22.56	3
>>ssc-miR-9846-3p	LNC_001432	-26.24	157
>>ssc-miR-9846-3p	LNC_002273	-26.05	2371
>>ssc-miR-9847-3p	LNC_000994	-30.04	957
>>ssc-miR-9847-3p	LNC_001520	-26.08	449 115 784 902
>>ssc-miR-9847-3p	LNC_001346	-33.78	2166 736 2451
>>ssc-miR-9847-3p	LNC_002308	-25.78	166 500
>>ssc-miR-9847-3p	LNC_001235	-33.78	480 1132 765
>>ssc-miR-9847-3p	LNC_001897	-23.91	1258
>>ssc-miR-9847-3p	LNC_001678	-28.33	661
>>ssc-miR-9847-3p	LNC_001222	-23.81	226
>>ssc-miR-9847-3p	LNC_002001	-27.96	303 14
>>ssc-miR-9847-3p	LNC_001096	-31.02	201
>>ssc-miR-9847-3p	LNC_002273	-23.23	4425
>>ssc-miR-9847-3p	LNC_001053	-26.93	306
>>ssc-miR-9847-3p	LNC_000926	-20.89	590
>>ssc-miR-9847-3p	LNC_000298	-23.86	763
>>ssc-miR-9848-3p	LNC_000994	-25.78	365
>>ssc-miR-9849-5p	LNC_002276	-22.34	960
>>ssc-miR-9850-5p	LNC_002273	-20.89	4619
>>ssc-miR-9851-3p	LNC_001520	-27.46	1196
>>ssc-miR-9851-3p	LNC_001346	-26.43	1391 1330 2131
>>ssc-miR-9852-3p	LNC_002279	-21.43	1091
>>ssc-miR-9852-3p	LNC_001588	-23.32	713
>>ssc-miR-9852-3p	LNC_002331	-23.71	183
>>ssc-miR-9852-3p	LNC_000689	-30.75	298
>>ssc-miR-9852-3p	LNC_001444	-22.19	34
>>ssc-miR-9852-3p	LNC_002273	-22.08	5130
>>ssc-miR-9852-3p	LNC_000374	-24.24	388
>>ssc-miR-9852-3p	LNC_000044	-22.08	17
>>ssc-miR-9852-3p	LNC_000415	-20.84	9
>>ssc-miR-9852-3p	LNC_001493	-20.45	5
>>ssc-miR-9854-5p	LNC_000338	-20.37	457
>>ssc-miR-9855-5p	LNC_002273	-21.46	4235
>>ssc-miR-9856-3p	LNC_001590	-26.6	223 1218 867
>>ssc-miR-9856-3p	LNC_002190	-23.82	117
>>ssc-miR-9857-5p	LNC_002016	-20.34	770
>>ssc-miR-9857-5p	LNC_000504	-22.65	1228
>>ssc-miR-9857-5p	LNC_002309	-21.25	381
>>ssc-miR-9858-5p	LNC_000994	-20.91	1510
>>ssc-miR-9858-5p	LNC_000708	-21.91	305
>>ssc-miR-9858-5p	LNC_002272	-26.02	4195 159
>>ssc-miR-9858-5p	LNC_001678	-20.25	2474
>>ssc-miR-9858-5p	LNC_002273	-26.02	12354 9480
>>ssc-miR-9858-5p	LNC_000187	-23.04	85
>>ssc-miR-9858-5p	LNC_000303	-24.31	729
>>ssc-miR-9859-3p	LNC_002272	-20.89	2778
>>ssc-miR-9859-3p	LNC_000068	-22.69	463
>>ssc-miR-9859-3p	LNC_001897	-20.13	1113
>>ssc-miR-9859-3p	LNC_001432	-23.73	2556
>>ssc-miR-9859-3p	LNC_002273	-20.89	10937
>>ssc-miR-9859-3p	LNC_000298	-23.87	746
>>ssc-miR-9860-5p	LNC_002276	-25.68	2165
>>ssc-miR-9860-5p	LNC_001589	-22.41	354
>>ssc-miR-9860-5p	LNC_001588	-21.96	162 628

## Sheet: RNAhybrid
Supplemental file 9: RNAhybrid predicted target miRNAs of lncRNA in PME
miRNA ID	lncRNA ID	Energy kCal/Mol	Positions
ssc-let-7a	LNC_002284	-29.7	29
ssc-let-7a	LNC_000708	-28.7	330
ssc-let-7a	LNC_001432	-28	3866
ssc-let-7a	LNC_000881	-26.9	35
ssc-let-7a	LNC_002272	-26.4	4223
ssc-let-7a	LNC_001602	-25.9	116
ssc-let-7a	LNC_001346	-25.4	2726
ssc-let-7a	LNC_001235	-25.4	1041
ssc-let-7a	LNC_001222	-24.8	178
ssc-let-7a	LNC_000126	-24.7	248
ssc-let-7a	LNC_000338	-24.4	383
ssc-let-7a	LNC_001412	-24.3	996
ssc-let-7a	LNC_002450	-24.1	1128
ssc-let-7a	LNC_001217	-23.9	317
ssc-let-7a	LNC_000572	-23.3	269
ssc-let-7a	LNC_000303	-22.9	238
ssc-let-7a	LNC_002016	-22.8	379
ssc-let-7a	LNC_000261	-21.6	1952
ssc-let-7a	LNC_000994	-21.4	1283
ssc-let-7a	LNC_002290	-20.9	172
ssc-let-7a	LNC_002289	-20.9	207
ssc-let-7a	ALDBSSCT0000009539	-20.9	568
ssc-let-7a	LNC_002279	-20.8	836
ssc-let-7a	LNC_000486	-20.8	298
ssc-let-7a	LNC_001678	-20.4	290
ssc-let-7a	LNC_002331	-20.2	122
ssc-let-7a	LNC_000797	-20.1	265
ssc-let-7a	LNC_001373	-20	509
ssc-let-7a	LNC_000298	-20	1493
ssc-let-7c	LNC_000708	-32.2	327
ssc-let-7c	LNC_000881	-30.3	24
ssc-let-7c	LNC_002284	-30	27
ssc-let-7c	LNC_000338	-29.2	372
ssc-let-7c	LNC_001346	-29.1	2716
ssc-let-7c	LNC_001235	-29.1	1031
ssc-let-7c	LNC_002272	-28.2	4210
ssc-let-7c	LNC_001602	-28.2	118
ssc-let-7c	LNC_001432	-28	3866
ssc-let-7c	LNC_001222	-26.2	182
ssc-let-7c	LNC_000994	-26.1	1171
ssc-let-7c	LNC_002331	-25.5	125
ssc-let-7c	LNC_001412	-25.3	1000
ssc-let-7c	LNC_001217	-24.9	314
ssc-let-7c	LNC_000261	-24.1	1947
ssc-let-7c	LNC_002290	-23.9	404
ssc-let-7c	LNC_002289	-23.9	437
ssc-let-7c	LNC_000303	-23.8	569
ssc-let-7c	LNC_000126	-23.6	259
ssc-let-7c	LNC_002016	-23.2	370
ssc-let-7c	LNC_002308	-23	350
ssc-let-7c	LNC_000298	-22.9	1483
ssc-let-7c	LNC_002450	-22.8	1128
ssc-let-7c	LNC_001678	-22.1	297
ssc-let-7c	LNC_000572	-22	269
ssc-let-7c	LNC_000486	-22	293
ssc-let-7c	LNC_000550	-21.9	304
ssc-let-7c	LNC_002280	-21.8	813
ssc-let-7c	LNC_002328	-21.8	521
ssc-let-7c	LNC_000236	-21.3	220
ssc-let-7c	LNC_002001	-21.1	303
ssc-let-7c	LNC_002279	-20.5	836
ssc-let-7c	LNC_001373	-20.5	516
ssc-let-7c	LNC_002277	-20.2	672
ssc-let-7c	LNC_001096	-20.2	1421
ssc-let-7c	LNC_000362	-20	384
ssc-let-7d-3p	ALDBSSCT0000001463	-26.1	1728
ssc-let-7d-3p	LNC_002450	-24.4	1377
ssc-let-7d-3p	LNC_000994	-21.5	289
ssc-let-7d-3p	LNC_001432	-21.1	3303
ssc-let-7d-3p	LNC_001897	-20.9	1135
ssc-let-7d-5p	LNC_001432	-30.8	3866
ssc-let-7d-5p	LNC_000708	-30.7	330
ssc-let-7d-5p	LNC_002272	-27.5	4223
ssc-let-7d-5p	LNC_001222	-27	178
ssc-let-7d-5p	LNC_000881	-26.5	29
ssc-let-7d-5p	LNC_002284	-26.4	23
ssc-let-7d-5p	LNC_002016	-26.4	379
ssc-let-7d-5p	LNC_001412	-26	996
ssc-let-7d-5p	LNC_001678	-25.9	290
ssc-let-7d-5p	LNC_002450	-25.8	1128
ssc-let-7d-5p	LNC_001346	-25.5	3727
ssc-let-7d-5p	LNC_001235	-25.5	2042
ssc-let-7d-5p	LNC_000126	-24.8	248
ssc-let-7d-5p	LNC_000994	-23.8	1283
ssc-let-7d-5p	LNC_000261	-23.6	1957
ssc-let-7d-5p	LNC_001602	-23.5	116
ssc-let-7d-5p	LNC_001217	-22.9	467
ssc-let-7d-5p	LNC_002290	-22.8	172
ssc-let-7d-5p	LNC_002289	-22.8	207
ssc-let-7d-5p	LNC_001096	-22	7
ssc-let-7d-5p	LNC_000338	-21.8	379
ssc-let-7d-5p	LNC_002277	-21.5	670
ssc-let-7d-5p	LNC_001520	-21.4	441
ssc-let-7d-5p	LNC_002331	-21.2	135
ssc-let-7d-5p	LNC_001711	-21.1	596
ssc-let-7d-5p	LNC_001373	-21	272
ssc-let-7d-5p	LNC_002280	-20.8	821
ssc-let-7d-5p	LNC_002328	-20.8	529
ssc-let-7d-5p	LNC_002044	-20.7	49
ssc-let-7d-5p	ALDBSSCT0000003459	-20.4	809
ssc-let-7d-5p	ALDBSSCT0000001463	-20.3	1604
ssc-let-7d-5p	LNC_000303	-20.2	228
ssc-let-7d-5p	LNC_000298	-20.1	458
ssc-let-7d-5p	LNC_000541	-20.1	305
ssc-let-7e	LNC_002284	-28.8	29
ssc-let-7e	LNC_000994	-28.2	1283
ssc-let-7e	LNC_002016	-27.5	379
ssc-let-7e	LNC_002272	-26.3	2776
ssc-let-7e	LNC_002044	-26.3	49
ssc-let-7e	LNC_000708	-26.2	330
ssc-let-7e	LNC_000881	-25.6	35
ssc-let-7e	LNC_001432	-25.5	3866
ssc-let-7e	LNC_001346	-25.4	3727
ssc-let-7e	LNC_001235	-25.4	2042
ssc-let-7e	LNC_002290	-24.8	410
ssc-let-7e	LNC_002289	-24.8	443
ssc-let-7e	LNC_002277	-24.3	680
ssc-let-7e	LNC_001412	-24	354
ssc-let-7e	LNC_000572	-24	269
ssc-let-7e	LNC_000126	-23.9	248
ssc-let-7e	LNC_000261	-23.8	1952
ssc-let-7e	LNC_001602	-23.7	323
ssc-let-7e	LNC_001217	-23.7	467
ssc-let-7e	LNC_001222	-23.1	178
ssc-let-7e	LNC_000303	-22.2	238
ssc-let-7e	LNC_002450	-22.1	276
ssc-let-7e	LNC_000338	-22.1	383
ssc-let-7e	ALDBSSCT0000001463	-22.1	565
ssc-let-7e	ALDBSSCT0000009539	-21.9	568
ssc-let-7e	LNC_001678	-21.3	1523
ssc-let-7e	LNC_001096	-21	1509
ssc-let-7e	LNC_000415	-20.8	210
ssc-let-7e	LNC_000486	-20.8	298
ssc-let-7e	LNC_002001	-20.6	289
ssc-let-7e	LNC_000298	-20.6	458
ssc-let-7e	ALDBSSCT0000003459	-20.6	737
ssc-let-7e	LNC_000362	-20.4	391
ssc-let-7e	LNC_001110	-20.2	289
ssc-let-7e	LNC_002280	-20.1	821
ssc-let-7e	LNC_002308	-20.1	350
ssc-let-7e	LNC_002328	-20.1	529
ssc-let-7f-3p	ALDBSSCT0000001463	-24.3	1728
ssc-let-7f-3p	LNC_001432	-20.3	4892
ssc-let-7f-5p	LNC_000881	-26.9	35
ssc-let-7f-5p	LNC_002450	-25.2	1131
ssc-let-7f-5p	LNC_001432	-24	3866
ssc-let-7f-5p	LNC_001222	-23.7	178
ssc-let-7f-5p	LNC_001346	-23.5	2728
ssc-let-7f-5p	LNC_001235	-23.5	1043
ssc-let-7f-5p	LNC_002284	-23	29
ssc-let-7f-5p	LNC_002272	-22.7	2987
ssc-let-7f-5p	LNC_001602	-22.5	116
ssc-let-7f-5p	LNC_001412	-22.1	996
ssc-let-7f-5p	LNC_000708	-21.8	330
ssc-let-7f-5p	ALDBSSCT0000009539	-21.8	568
ssc-let-7f-5p	LNC_000126	-20.9	248
ssc-let-7f-5p	LNC_002280	-20.5	2273
ssc-let-7f-5p	LNC_002328	-20.5	2146
ssc-let-7f-5p	LNC_000541	-20.5	313
ssc-let-7f-5p	LNC_000298	-20.2	1493
ssc-let-7f-5p	LNC_002016	-20.1	104
ssc-let-7f-5p	LNC_000797	-20	265
ssc-let-7g	LNC_002450	-28	1128
ssc-let-7g	LNC_000881	-27.9	33
ssc-let-7g	LNC_001432	-25.6	3866
ssc-let-7g	LNC_002284	-25	29
ssc-let-7g	LNC_000126	-24.9	248
ssc-let-7g	LNC_001346	-24.5	2726
ssc-let-7g	LNC_001235	-24.5	1041
ssc-let-7g	LNC_001602	-24.2	105
ssc-let-7g	LNC_001412	-24.2	999
ssc-let-7g	LNC_002272	-23.8	4746
ssc-let-7g	LNC_000572	-22.7	269
ssc-let-7g	ALDBSSCT0000009539	-21.4	568
ssc-let-7g	LNC_000708	-21.3	336
ssc-let-7g	LNC_001678	-20.8	290
ssc-let-7g	LNC_000797	-20.8	265
ssc-let-7g	LNC_001217	-20.4	323
ssc-let-7g	LNC_001373	-20.4	284
ssc-let-7g	LNC_001520	-20.3	441
ssc-let-7g	LNC_000303	-20.3	231
ssc-let-7g	LNC_002016	-20.2	379
ssc-let-7g	LNC_000415	-20	210
ssc-let-7i-3p	LNC_001602	-30.1	3475
ssc-let-7i-3p	LNC_000994	-24.7	833
ssc-let-7i-3p	LNC_002450	-24.3	1391
ssc-let-7i-3p	LNC_001373	-23.2	248
ssc-let-7i-3p	LNC_000187	-22	160
ssc-let-7i-3p	LNC_000298	-21.4	561
ssc-let-7i-3p	LNC_002332	-21.1	190
ssc-let-7i-5p	LNC_000126	-27.9	260
ssc-let-7i-5p	LNC_000881	-27.7	35
ssc-let-7i-5p	LNC_001412	-27.3	1000
ssc-let-7i-5p	LNC_001346	-24.5	2726
ssc-let-7i-5p	LNC_001235	-24.5	1041
ssc-let-7i-5p	LNC_002016	-24.2	384
ssc-let-7i-5p	LNC_002450	-24	1134
ssc-let-7i-5p	LNC_002272	-23.5	4227
ssc-let-7i-5p	LNC_001602	-23.1	123
ssc-let-7i-5p	LNC_000994	-22.3	874
ssc-let-7i-5p	LNC_000298	-22.3	1483
ssc-let-7i-5p	LNC_001432	-21.8	3875
ssc-let-7i-5p	LNC_001678	-21.8	297
ssc-let-7i-5p	LNC_002284	-20.9	28
ssc-let-7i-5p	LNC_002308	-20.9	350
ssc-let-7i-5p	LNC_002277	-20.8	677
ssc-let-7i-5p	LNC_001217	-20.8	322
ssc-let-7i-5p	LNC_000261	-20.7	1959
ssc-let-7i-5p	LNC_000708	-20.5	337
ssc-let-7i-5p	ALDBSSCT0000001463	-20.4	567
ssc-let-7i-5p	ALDBSSCT0000009539	-20.2	579
ssc-miR-1	LNC_000070	-23	235
ssc-miR-1	LNC_000298	-21	3954
ssc-miR-1	LNC_001346	-20.7	2513
ssc-miR-1	LNC_002292	-20.6	1142
ssc-miR-1	LNC_002337	-20.6	268
ssc-miR-1	LNC_001235	-20.4	829
ssc-miR-100	LNC_001412	-23.5	422
ssc-miR-100	LNC_002286	-22	6
ssc-miR-100	LNC_002001	-21.9	259
ssc-miR-100	LNC_000261	-21.5	793
ssc-miR-100	LNC_002331	-21.2	99
ssc-miR-100	ALDBSSCT0000001449	-21.2	239
ssc-miR-100	LNC_001738	-21	77
ssc-miR-100	LNC_000126	-21	5
ssc-miR-100	LNC_000338	-21	56
ssc-miR-100	LNC_000926	-21	1486
ssc-miR-100	LNC_001602	-20.6	1954
ssc-miR-100	LNC_000797	-20.6	17
ssc-miR-100	LNC_000044	-20.6	12
ssc-miR-100	LNC_000629	-20.6	33
ssc-miR-101	LNC_001711	-22.6	544
ssc-miR-101	LNC_000374	-20.9	415
ssc-miR-101	LNC_001623	-20.9	195
ssc-miR-101	LNC_001602	-20.7	789
ssc-miR-101	LNC_000708	-20.5	69
ssc-miR-103	LNC_001235	-30.3	2664
ssc-miR-103	LNC_000068	-29.8	36
ssc-miR-103	LNC_001432	-29.2	4204
ssc-miR-103	LNC_002308	-28.9	279
ssc-miR-103	LNC_000187	-28.9	239
ssc-miR-103	LNC_002292	-28.4	88
ssc-miR-103	LNC_001110	-27.2	23
ssc-miR-103	LNC_001374	-26.9	978
ssc-miR-103	LNC_000374	-26.3	435
ssc-miR-103	LNC_002272	-26.2	3148
ssc-miR-103	LNC_001375	-26.2	861
ssc-miR-103	LNC_000994	-26.1	796
ssc-miR-103	LNC_001602	-26.1	791
ssc-miR-103	LNC_000261	-25.9	1668
ssc-miR-103	LNC_000686	-25.5	22
ssc-miR-103	LNC_000226	-25.4	305
ssc-miR-103	LNC_001536	-25.4	315
ssc-miR-103	LNC_000044	-25.2	162
ssc-miR-103	LNC_000415	-24.8	27
ssc-miR-103	LNC_001493	-24.6	150
ssc-miR-103	LNC_002450	-24.5	670
ssc-miR-103	LNC_000881	-24.1	39
ssc-miR-103	LNC_001711	-24	542
ssc-miR-103	LNC_000926	-24	1598
ssc-miR-103	LNC_001897	-23.7	490
ssc-miR-103	LNC_002280	-23.6	1882
ssc-miR-103	LNC_001300	-23.4	98
ssc-miR-103	LNC_000298	-23.4	4183
ssc-miR-103	LNC_001312	-23.1	1
ssc-miR-103	LNC_002286	-22.6	161
ssc-miR-103	LNC_002328	-22.6	299
ssc-miR-103	LNC_000797	-22.5	258
ssc-miR-103	LNC_001053	-22.5	401
ssc-miR-103	LNC_000708	-22	64
ssc-miR-103	LNC_001678	-21.8	284
ssc-miR-103	LNC_002449	-21.5	287
ssc-miR-103	LNC_002279	-21	665
ssc-miR-103	LNC_002349	-20.9	8
ssc-miR-103	LNC_000629	-20.8	91
ssc-miR-103	LNC_000689	-20.4	489
ssc-miR-10382	LNC_000499	-40.6	896
ssc-miR-10382	LNC_000261	-39.4	161
ssc-miR-10382	LNC_002450	-35.8	94
ssc-miR-10382	LNC_000926	-34.4	1288
ssc-miR-10382	LNC_002280	-33.9	1499
ssc-miR-10382	LNC_002328	-33.9	1200
ssc-miR-10382	LNC_001346	-31.8	1209
ssc-miR-10382	LNC_001711	-30.7	31
ssc-miR-10382	LNC_000504	-28.3	873
ssc-miR-10382	LNC_001602	-27.5	3626
ssc-miR-10382	LNC_002345	-25.2	339
ssc-miR-10382	LNC_001235	-24.3	630
ssc-miR-10382	LNC_002001	-23.8	281
ssc-miR-10382	LNC_001590	-23.6	1795
ssc-miR-10382	LNC_000689	-22.1	148
ssc-miR-10382	ALDBSSCT0000001463	-21.8	718
ssc-miR-10383	LNC_001346	-38.1	2862
ssc-miR-10383	ALDBSSCT0000003459	-31.9	134
ssc-miR-10383	LNC_002331	-31.6	503
ssc-miR-10383	LNC_001235	-31.4	1864
ssc-miR-10383	LNC_000994	-30.4	918
ssc-miR-10383	LNC_002450	-30.1	1167
ssc-miR-10383	LNC_000298	-29.6	655
ssc-miR-10383	LNC_001110	-29.2	105
ssc-miR-10383	LNC_001602	-28.9	1182
ssc-miR-10383	LNC_001678	-28.8	581
ssc-miR-10383	LNC_002272	-28.5	402
ssc-miR-10383	LNC_002309	-28.5	1
ssc-miR-10383	LNC_002332	-28.4	54
ssc-miR-10383	LNC_002308	-27.4	317
ssc-miR-10383	LNC_002339	-27.4	92
ssc-miR-10383	LNC_001520	-27.3	30
ssc-miR-10383	LNC_001646	-27.3	116
ssc-miR-10383	LNC_001432	-27.3	234
ssc-miR-10383	LNC_001412	-27.2	773
ssc-miR-10383	LNC_001374	-27	1274
ssc-miR-10383	LNC_002280	-26.7	357
ssc-miR-10383	LNC_002328	-26.7	66
ssc-miR-10383	LNC_002276	-26.3	2007
ssc-miR-10383	LNC_001897	-25.8	982
ssc-miR-10383	ENSSSCT00000037405	-25.8	136
ssc-miR-10383	LNC_000068	-25.3	776
ssc-miR-10383	ALDBSSCT0000009539	-25.3	492
ssc-miR-10383	LNC_001711	-24.9	3
ssc-miR-10383	LNC_002016	-24.8	850
ssc-miR-10383	LNC_002190	-24.8	337
ssc-miR-10383	LNC_000504	-24.7	397
ssc-miR-10383	LNC_001590	-24.5	722
ssc-miR-10383	LNC_000499	-24.4	112
ssc-miR-10383	LNC_002284	-24	104
ssc-miR-10383	LNC_002290	-23.7	315
ssc-miR-10383	LNC_000261	-23.7	2205
ssc-miR-10383	LNC_001096	-23.2	1320
ssc-miR-10383	ALDBSSCT0000001463	-23.2	1748
ssc-miR-10383	LNC_001995	-23	167
ssc-miR-10383	LNC_002289	-22.8	341
ssc-miR-10383	LNC_002337	-22.7	460
ssc-miR-10383	LNC_001375	-22.1	759
ssc-miR-10383	LNC_001536	-21.9	314
ssc-miR-10383	LNC_002277	-21.7	967
ssc-miR-10383	LNC_000708	-21.6	50
ssc-miR-10383	LNC_001588	-21.2	16
ssc-miR-10383	LNC_001444	-20.9	419
ssc-miR-10383	LNC_000962	-20.7	740
ssc-miR-10383	LNC_000187	-20.5	360
ssc-miR-10383	LNC_000541	-20.5	401
ssc-miR-10383	LNC_000303	-20.2	397
ssc-miR-10384	LNC_001235	-36.4	1150
ssc-miR-10384	LNC_001432	-34.5	244
ssc-miR-10384	LNC_000298	-33.8	39
ssc-miR-10384	LNC_002272	-33.3	647
ssc-miR-10384	LNC_002276	-33	197
ssc-miR-10384	LNC_001588	-31.7	691
ssc-miR-10384	LNC_002331	-31.7	522
ssc-miR-10384	LNC_001589	-31.5	312
ssc-miR-10384	LNC_001590	-31	1676
ssc-miR-10384	LNC_001602	-30.8	2916
ssc-miR-10384	LNC_002378	-30.8	72
ssc-miR-10384	LNC_001441	-30.8	86
ssc-miR-10384	LNC_000070	-30.8	70
ssc-miR-10384	LNC_000374	-30.8	46
ssc-miR-10384	LNC_002044	-30.8	201
ssc-miR-10384	LNC_000370	-30.8	11
ssc-miR-10384	ALDBSSCT0000001463	-30.7	921
ssc-miR-10384	LNC_002328	-30.3	1039
ssc-miR-10384	LNC_002450	-29.6	937
ssc-miR-10384	LNC_001346	-29.5	2479
ssc-miR-10384	LNC_001375	-29.5	853
ssc-miR-10384	LNC_002345	-29.2	228
ssc-miR-10384	LNC_000994	-28.9	1503
ssc-miR-10384	LNC_001374	-28.8	970
ssc-miR-10384	LNC_000236	-28.5	736
ssc-miR-10384	LNC_000708	-28.2	26
ssc-miR-10384	LNC_002280	-28	1336
ssc-miR-10384	LNC_000629	-27.6	120
ssc-miR-10384	LNC_002339	-27.2	322
ssc-miR-10384	LNC_001987	-27	71
ssc-miR-10384	LNC_000261	-26.2	176
ssc-miR-10384	LNC_002277	-25.5	624
ssc-miR-10384	LNC_002286	-25.3	62
ssc-miR-10384	LNC_001110	-25.1	792
ssc-miR-10384	LNC_002016	-25	1349
ssc-miR-10384	LNC_000962	-25	15
ssc-miR-10384	LNC_001738	-24.9	204
ssc-miR-10384	LNC_002332	-24.9	437
ssc-miR-10384	ALDBSSCT0000009539	-24.7	142
ssc-miR-10384	LNC_001312	-24.2	58
ssc-miR-10384	LNC_000126	-23.8	115
ssc-miR-10384	LNC_000572	-23.8	60
ssc-miR-10384	LNC_000797	-23.8	98
ssc-miR-10384	LNC_001536	-23.8	7
ssc-miR-10384	LNC_002065	-23.8	172
ssc-miR-10384	LNC_000504	-23.4	933
ssc-miR-10384	LNC_001096	-23.4	1615
ssc-miR-10384	LNC_000920	-23.2	146
ssc-miR-10384	LNC_001711	-23.1	221
ssc-miR-10384	LNC_001995	-23	161
ssc-miR-10384	LNC_000303	-22.8	464
ssc-miR-10384	LNC_000187	-22.7	265
ssc-miR-10384	LNC_002279	-22.6	1137
ssc-miR-10384	LNC_000033	-22.1	3
ssc-miR-10384	LNC_002337	-22	236
ssc-miR-10384	LNC_001300	-21.9	3
ssc-miR-10384	LNC_000362	-21.9	36
ssc-miR-10384	LNC_000338	-21.9	140
ssc-miR-10384	LNC_000926	-21.9	1570
ssc-miR-10384	LNC_001493	-21.9	55
ssc-miR-10384	LNC_001444	-21.5	80
ssc-miR-10384	ALDBSSCT0000001449	-21.3	335
ssc-miR-10384	LNC_000044	-21.2	99
ssc-miR-10384	LNC_000415	-20.7	91
ssc-miR-10384	LNC_002449	-20.6	63
ssc-miR-10386	LNC_001602	-40.8	1228
ssc-miR-10386	LNC_002272	-40.4	459
ssc-miR-10386	LNC_002450	-39.8	928
ssc-miR-10386	LNC_001346	-38.9	1027
ssc-miR-10386	LNC_001374	-38.4	1260
ssc-miR-10386	LNC_001432	-34.9	460
ssc-miR-10386	LNC_000926	-33.4	634
ssc-miR-10386	LNC_000499	-32.7	70
ssc-miR-10386	LNC_000261	-32.1	1113
ssc-miR-10386	LNC_002280	-31.4	1516
ssc-miR-10386	LNC_002276	-30.7	1337
ssc-miR-10386	LNC_002016	-30.7	1490
ssc-miR-10386	LNC_000504	-30.6	873
ssc-miR-10386	LNC_002331	-29.8	319
ssc-miR-10386	LNC_001235	-29.6	1522
ssc-miR-10386	LNC_002308	-29	305
ssc-miR-10386	ALDBSSCT0000003459	-28.5	780
ssc-miR-10386	LNC_001995	-28.4	127
ssc-miR-10386	LNC_001520	-28.3	1236
ssc-miR-10386	LNC_000187	-28	503
ssc-miR-10386	LNC_000303	-27.7	1618
ssc-miR-10386	LNC_001412	-27.4	838
ssc-miR-10386	LNC_000962	-26.9	469
ssc-miR-10386	LNC_001590	-25.5	1594
ssc-miR-10386	LNC_001897	-25.4	523
ssc-miR-10386	LNC_000068	-24.7	643
ssc-miR-10386	LNC_001444	-23.7	356
ssc-miR-10386	LNC_000994	-23.5	2213
ssc-miR-10386	LNC_001217	-23.2	123
ssc-miR-10386	LNC_000881	-22.3	84
ssc-miR-10386	LNC_002337	-21.9	20
ssc-miR-10386	LNC_002328	-21.8	119
ssc-miR-10386	LNC_002286	-21	119
ssc-miR-10386	LNC_001373	-20.7	594
ssc-miR-10386	LNC_000708	-20.6	749
ssc-miR-10386	LNC_002345	-20.3	69
ssc-miR-10387	LNC_002337	-30	157
ssc-miR-10387	LNC_001588	-29.4	182
ssc-miR-10387	LNC_002276	-29.2	1260
ssc-miR-10387	LNC_000068	-29	240
ssc-miR-10387	LNC_000261	-28.9	1347
ssc-miR-10387	LNC_001444	-27.9	456
ssc-miR-10387	LNC_001432	-26.1	3916
ssc-miR-10387	LNC_001602	-25.8	4708
ssc-miR-10387	LNC_000881	-25.2	84
ssc-miR-10387	LNC_002272	-23.4	2924
ssc-miR-10387	ALDBSSCT0000001463	-23.3	351
ssc-miR-10387	ALDBSSCT0000003459	-23.2	537
ssc-miR-10387	LNC_001096	-21.3	1282
ssc-miR-10387	LNC_000994	-21.1	2714
ssc-miR-10387	LNC_000298	-20.9	1270
ssc-miR-10387	LNC_001053	-20.7	398
ssc-miR-10387	LNC_002292	-20.6	216
ssc-miR-10387	LNC_000572	-20.6	316
ssc-miR-10388	LNC_001590	-25.6	488
ssc-miR-10388	LNC_001602	-24.4	3912
ssc-miR-10388	LNC_001217	-23	413
ssc-miR-10388	LNC_002272	-22.6	2050
ssc-miR-10388	LNC_001432	-21.4	4769
ssc-miR-10388	LNC_000370	-21.1	281
ssc-miR-10388	LNC_000504	-20.5	1341
ssc-miR-10388	ALDBSSCT0000001463	-20.4	1726
ssc-miR-10388	LNC_000261	-20	97
ssc-miR-10389	LNC_002331	-34.7	483
ssc-miR-10389	LNC_001678	-28	269
ssc-miR-10389	LNC_001235	-27.7	2093
ssc-miR-10389	LNC_000994	-27.2	2310
ssc-miR-10389	LNC_000499	-27.2	108
ssc-miR-10389	LNC_001432	-26.8	478
ssc-miR-10389	LNC_002272	-26.7	4036
ssc-miR-10389	LNC_000504	-26.7	1104
ssc-miR-10389	LNC_000261	-26.4	1633
ssc-miR-10389	LNC_002286	-26.2	48
ssc-miR-10389	ALDBSSCT0000003459	-25.8	138
ssc-miR-10389	LNC_001590	-25.4	175
ssc-miR-10389	LNC_000298	-25.4	3991
ssc-miR-10389	LNC_002276	-25	1486
ssc-miR-10389	LNC_001602	-25	1962
ssc-miR-10389	LNC_001110	-25	165
ssc-miR-10389	LNC_000303	-24.8	232
ssc-miR-10389	LNC_002016	-24.6	963
ssc-miR-10389	ALDBSSCT0000009539	-24.2	485
ssc-miR-10389	LNC_001217	-24	583
ssc-miR-10389	LNC_000068	-23.8	130
ssc-miR-10389	LNC_002450	-23.6	745
ssc-miR-10389	LNC_002065	-23.2	128
ssc-miR-10389	ALDBSSCT0000001449	-23.2	272
ssc-miR-10389	LNC_002279	-22.6	1123
ssc-miR-10389	LNC_000226	-22	325
ssc-miR-10389	LNC_002292	-21.8	643
ssc-miR-10389	LNC_002309	-21.8	258
ssc-miR-10389	LNC_002337	-21.5	304
ssc-miR-10389	LNC_001096	-21.4	2397
ssc-miR-10389	LNC_001346	-21.1	2137
ssc-miR-10389	LNC_000187	-21.1	229
ssc-miR-10389	LNC_000541	-20.6	232
ssc-miR-10389	ALDBSSCT0000001463	-20.6	1373
ssc-miR-10389	LNC_000374	-20.3	406
ssc-miR-10389	LNC_000044	-20.3	49
ssc-miR-10389	LNC_002044	-20.3	354
ssc-miR-10389	LNC_000033	-20.2	190
ssc-miR-10389	LNC_000920	-20.2	68
ssc-miR-10389	LNC_000719	-20.2	46
ssc-miR-10390	LNC_000261	-25.1	1113
ssc-miR-10390	LNC_001432	-24.8	3223
ssc-miR-10390	LNC_001373	-24.3	346
ssc-miR-10390	LNC_002280	-24.2	1777
ssc-miR-10390	LNC_002328	-24.2	1479
ssc-miR-10390	LNC_002272	-24	463
ssc-miR-10390	LNC_002345	-22.5	276
ssc-miR-10390	ALDBSSCT0000001449	-21.9	203
ssc-miR-10390	LNC_001346	-21	939
ssc-miR-10390	LNC_000994	-20.8	486
ssc-miR-10390	LNC_000303	-20.7	982
ssc-miR-10390	LNC_000926	-20.6	1024
ssc-miR-10390	ALDBSSCT0000003459	-20	495
ssc-miR-10391	LNC_002450	-31.4	559
ssc-miR-10391	LNC_001235	-29	1303
ssc-miR-10391	LNC_001374	-27.9	718
ssc-miR-10391	LNC_001375	-27.9	718
ssc-miR-10391	LNC_002016	-27.2	163
ssc-miR-10391	LNC_000994	-26.7	2059
ssc-miR-10391	LNC_001346	-26.2	2986
ssc-miR-10391	LNC_000926	-26.1	418
ssc-miR-10391	LNC_002300	-24.8	25
ssc-miR-10391	LNC_001897	-24.8	1308
ssc-miR-10391	LNC_001678	-24.6	332
ssc-miR-10391	LNC_001110	-24.5	586
ssc-miR-10391	LNC_002337	-23.7	310
ssc-miR-10391	LNC_002272	-23.3	3568
ssc-miR-10391	LNC_000962	-23.2	243
ssc-miR-10391	LNC_001432	-23.1	2106
ssc-miR-10391	LNC_000068	-22.5	317
ssc-miR-10391	LNC_001217	-22.1	409
ssc-miR-10391	LNC_002280	-21.9	116
ssc-miR-10391	LNC_001602	-21.8	4298
ssc-miR-10391	LNC_001412	-21.8	204
ssc-miR-10391	LNC_002277	-21.5	777
ssc-miR-10391	ENSSSCT00000037405	-21.5	15
ssc-miR-10391	LNC_001053	-21.3	244
ssc-miR-10391	LNC_002001	-21.1	32
ssc-miR-10391	LNC_002328	-21	1562
ssc-miR-10391	LNC_000499	-20.8	559
ssc-miR-10391	LNC_001590	-20.7	770
ssc-miR-10391	LNC_000298	-20.6	2092
ssc-miR-10391	ALDBSSCT0000003459	-20.6	406
ssc-miR-10391	LNC_000187	-20.4	432
ssc-miR-10391	LNC_000236	-20.3	123
ssc-miR-10391	LNC_000370	-20	178
ssc-miR-105-1	LNC_000719	-23.2	107
ssc-miR-105-1	LNC_001346	-22.9	2537
ssc-miR-105-1	LNC_001235	-22.9	853
ssc-miR-105-1	LNC_001444	-22.6	461
ssc-miR-105-2	LNC_000719	-23.3	107
ssc-miR-105-2	LNC_001346	-22.3	2537
ssc-miR-105-2	LNC_001235	-22.3	853
ssc-miR-105-2	LNC_001444	-22.3	443
ssc-miR-106a	LNC_001346	-25.3	2128
ssc-miR-106a	LNC_001235	-25.3	444
ssc-miR-106a	LNC_001711	-25.3	41
ssc-miR-106a	LNC_001520	-23.4	1271
ssc-miR-106a	LNC_002292	-22.6	209
ssc-miR-106a	LNC_002450	-22.6	757
ssc-miR-106a	LNC_000298	-22.2	216
ssc-miR-106a	LNC_000994	-21.8	15
ssc-miR-106a	LNC_002277	-21.7	819
ssc-miR-106a	ALDBSSCT0000009539	-21.3	497
ssc-miR-106a	LNC_000719	-20.5	55
ssc-miR-106a	LNC_001602	-20.4	1985
ssc-miR-106a	ALDBSSCT0000003459	-20.1	762
ssc-miR-107	LNC_001235	-31.9	2659
ssc-miR-107	LNC_001432	-30.9	4206
ssc-miR-107	LNC_002308	-30.6	272
ssc-miR-107	LNC_002292	-28.6	92
ssc-miR-107	LNC_001110	-28.5	20
ssc-miR-107	LNC_002272	-27.5	1251
ssc-miR-107	LNC_001374	-27.5	981
ssc-miR-107	LNC_000187	-27.5	246
ssc-miR-107	LNC_001602	-27	3164
ssc-miR-107	LNC_000994	-26.9	809
ssc-miR-107	LNC_000261	-26.9	1661
ssc-miR-107	LNC_001375	-26.8	864
ssc-miR-107	LNC_000068	-26.6	53
ssc-miR-107	LNC_000374	-26.1	428
ssc-miR-107	LNC_002450	-25.9	664
ssc-miR-107	LNC_000298	-25.6	4176
ssc-miR-107	LNC_000226	-25.4	305
ssc-miR-107	LNC_001536	-25.4	315
ssc-miR-107	LNC_000686	-25.3	83
ssc-miR-107	LNC_000044	-25.2	162
ssc-miR-107	LNC_000415	-25	21
ssc-miR-107	LNC_001493	-24.7	144
ssc-miR-107	LNC_000881	-24	47
ssc-miR-107	LNC_001897	-23.9	484
ssc-miR-107	LNC_002280	-23.7	1890
ssc-miR-107	LNC_002328	-23.7	295
ssc-miR-107	LNC_000797	-23.7	253
ssc-miR-107	LNC_002286	-23.4	141
ssc-miR-107	LNC_001300	-23.4	98
ssc-miR-107	LNC_002349	-23.2	10
ssc-miR-107	LNC_001312	-23.1	1
ssc-miR-107	LNC_000926	-23	1601
ssc-miR-107	LNC_000708	-22.5	61
ssc-miR-107	LNC_001711	-22.5	541
ssc-miR-107	LNC_001678	-22.2	282
ssc-miR-107	LNC_002279	-22.1	643
ssc-miR-107	LNC_001053	-21.8	404
ssc-miR-107	LNC_002449	-20.9	309
ssc-miR-107	LNC_000629	-20.6	107
ssc-miR-107	LNC_000689	-20.5	484
ssc-miR-10a-3p	LNC_002286	-24.6	9
ssc-miR-10a-3p	LNC_000298	-23.1	1019
ssc-miR-10a-3p	LNC_000126	-22.5	21
ssc-miR-10a-3p	LNC_000797	-22.5	4
ssc-miR-10a-3p	LNC_001432	-21.9	4851
ssc-miR-10a-3p	LNC_001374	-21.7	397
ssc-miR-10a-3p	LNC_001375	-21.7	397
ssc-miR-10a-5p	LNC_002276	-26.5	390
ssc-miR-10a-5p	LNC_001432	-26.2	457
ssc-miR-10a-5p	LNC_001711	-26	1
ssc-miR-10a-5p	LNC_001110	-25.8	504
ssc-miR-10a-5p	LNC_001346	-25.7	833
ssc-miR-10a-5p	LNC_001646	-25.3	304
ssc-miR-10a-5p	LNC_000187	-24.7	325
ssc-miR-10a-5p	LNC_001602	-24.5	1725
ssc-miR-10a-5p	LNC_002349	-23.7	84
ssc-miR-10a-5p	LNC_002309	-23.4	680
ssc-miR-10a-5p	LNC_001590	-23.3	481
ssc-miR-10a-5p	LNC_000994	-23.3	1706
ssc-miR-10a-5p	LNC_000499	-23.3	266
ssc-miR-10a-5p	LNC_002016	-22.9	871
ssc-miR-10a-5p	LNC_001235	-22.5	3250
ssc-miR-10a-5p	LNC_001096	-22.5	2328
ssc-miR-10a-5p	LNC_002272	-22.3	563
ssc-miR-10a-5p	LNC_000298	-21.6	1223
ssc-miR-10a-5p	LNC_000261	-21.1	197
ssc-miR-10a-5p	LNC_000504	-20.6	404
ssc-miR-10a-5p	LNC_002277	-20.5	1169
ssc-miR-10b	LNC_000994	-26.5	1707
ssc-miR-10b	LNC_001711	-26	1
ssc-miR-10b	LNC_001110	-25.3	504
ssc-miR-10b	LNC_002016	-25.1	871
ssc-miR-10b	LNC_001432	-25	457
ssc-miR-10b	LNC_000187	-24.8	325
ssc-miR-10b	LNC_002276	-23.9	2126
ssc-miR-10b	LNC_002309	-23.9	680
ssc-miR-10b	LNC_001602	-23.8	1747
ssc-miR-10b	LNC_001346	-23.8	833
ssc-miR-10b	LNC_002349	-23.7	84
ssc-miR-10b	LNC_000499	-23.4	280
ssc-miR-10b	LNC_001646	-22.8	163
ssc-miR-10b	LNC_000261	-22.7	211
ssc-miR-10b	LNC_001096	-22.7	2481
ssc-miR-10b	LNC_001235	-22.5	3250
ssc-miR-10b	LNC_001590	-22.4	1026
ssc-miR-10b	LNC_002272	-22.3	553
ssc-miR-10b	LNC_000298	-21.6	1223
ssc-miR-10b	LNC_002277	-20.7	1169
ssc-miR-10b	LNC_000504	-20.6	404
ssc-miR-122-3p	LNC_000920	-22.4	150
ssc-miR-122-3p	LNC_002279	-22.3	1140
ssc-miR-122-3p	LNC_001346	-21.3	65
ssc-miR-122-3p	LNC_000374	-21	488
ssc-miR-122-3p	LNC_000044	-21	113
ssc-miR-122-3p	LNC_000126	-20.9	93
ssc-miR-122-3p	LNC_001300	-20.9	7
ssc-miR-122-3p	LNC_000226	-20.9	40
ssc-miR-122-3p	LNC_000362	-20.9	40
ssc-miR-122-3p	LNC_000338	-20.9	144
ssc-miR-122-3p	LNC_001312	-20.9	36
ssc-miR-122-3p	LNC_000797	-20.9	76
ssc-miR-122-3p	LNC_000926	-20.9	1574
ssc-miR-122-3p	LNC_000629	-20.9	92
ssc-miR-122-3p	LNC_001493	-20.9	59
ssc-miR-122-3p	LNC_002065	-20.9	150
ssc-miR-122-3p	ALDBSSCT0000001449	-20.4	352
ssc-miR-122-3p	LNC_001678	-20.2	123
ssc-miR-1224	LNC_001346	-34.4	2085
ssc-miR-1224	LNC_001235	-34.4	401
ssc-miR-1224	LNC_000994	-33	2208
ssc-miR-1224	LNC_000261	-30.9	1107
ssc-miR-1224	LNC_000926	-29.8	1286
ssc-miR-1224	LNC_001995	-28.6	308
ssc-miR-1224	LNC_000236	-28.4	662
ssc-miR-1224	LNC_001412	-28.3	517
ssc-miR-1224	LNC_001602	-27.6	419
ssc-miR-1224	LNC_002016	-27.4	1380
ssc-miR-1224	LNC_002349	-26.5	127
ssc-miR-1224	LNC_002332	-25.7	417
ssc-miR-1224	LNC_002272	-24.8	531
ssc-miR-1224	LNC_000708	-24.7	40
ssc-miR-1224	LNC_002450	-24.6	525
ssc-miR-1224	LNC_000298	-23.4	1134
ssc-miR-1224	LNC_001520	-23.3	1221
ssc-miR-1224	LNC_002309	-22.5	296
ssc-miR-1224	LNC_001096	-22.2	1603
ssc-miR-1224	LNC_000962	-21.7	105
ssc-miR-1224	LNC_000303	-20.2	1578
ssc-miR-122-5p	LNC_000994	-26.9	1996
ssc-miR-122-5p	LNC_002272	-26.9	2586
ssc-miR-122-5p	LNC_002339	-26.7	477
ssc-miR-122-5p	LNC_002332	-26.6	67
ssc-miR-122-5p	ALDBSSCT0000003459	-26.6	343
ssc-miR-122-5p	LNC_002337	-26.3	245
ssc-miR-122-5p	LNC_002277	-26.2	906
ssc-miR-122-5p	LNC_000298	-25.2	974
ssc-miR-122-5p	LNC_002289	-24.7	530
ssc-miR-122-5p	LNC_002276	-24.1	1455
ssc-miR-122-5p	LNC_001678	-23.8	1662
ssc-miR-122-5p	LNC_002292	-23.7	1143
ssc-miR-122-5p	LNC_000504	-23.6	1142
ssc-miR-122-5p	ALDBSSCT0000001463	-23.6	556
ssc-miR-122-5p	LNC_001053	-23.5	375
ssc-miR-122-5p	LNC_000920	-23.5	259
ssc-miR-122-5p	LNC_002280	-23.1	100
ssc-miR-122-5p	LNC_000068	-23.1	548
ssc-miR-122-5p	LNC_002001	-23.1	2
ssc-miR-122-5p	LNC_002349	-23.1	50
ssc-miR-122-5p	LNC_001346	-22.8	3419
ssc-miR-122-5p	LNC_001235	-22.8	1735
ssc-miR-122-5p	LNC_001897	-22.7	1578
ssc-miR-122-5p	LNC_001217	-22.2	540
ssc-miR-122-5p	LNC_000187	-22.1	406
ssc-miR-122-5p	LNC_001590	-22	115
ssc-miR-122-5p	LNC_002284	-22	60
ssc-miR-122-5p	LNC_002016	-21.9	1886
ssc-miR-122-5p	LNC_001432	-21.6	4935
ssc-miR-122-5p	LNC_002345	-21.5	40
ssc-miR-122-5p	LNC_001711	-21.5	35
ssc-miR-122-5p	LNC_001374	-21.4	1442
ssc-miR-122-5p	LNC_000261	-21.3	1046
ssc-miR-122-5p	LNC_002450	-21.3	712
ssc-miR-122-5p	LNC_000499	-21.1	543
ssc-miR-122-5p	LNC_000415	-20.9	343
ssc-miR-122-5p	LNC_002279	-20.8	518
ssc-miR-122-5p	LNC_001241	-20.7	130
ssc-miR-122-5p	LNC_000541	-20.7	588
ssc-miR-122-5p	LNC_002290	-20.5	310
ssc-miR-122-5p	LNC_000962	-20.5	874
ssc-miR-122-5p	LNC_001110	-20.5	218
ssc-miR-122-5p	LNC_000686	-20.4	224
ssc-miR-122-5p	LNC_000236	-20.3	999
ssc-miR-1249	LNC_002016	-40.4	1342
ssc-miR-1249	LNC_001374	-39.5	1283
ssc-miR-1249	LNC_001346	-37.9	806
ssc-miR-1249	LNC_000499	-37.9	265
ssc-miR-1249	LNC_001432	-36.7	456
ssc-miR-1249	LNC_001520	-36.5	1234
ssc-miR-1249	ALDBSSCT0000003459	-34	782
ssc-miR-1249	LNC_000261	-33.9	1111
ssc-miR-1249	LNC_002272	-32.7	18
ssc-miR-1249	LNC_001602	-32.4	3687
ssc-miR-1249	LNC_002332	-31.7	47
ssc-miR-1249	LNC_002450	-30.4	619
ssc-miR-1249	LNC_000962	-28.8	210
ssc-miR-1249	LNC_002339	-28.5	307
ssc-miR-1249	LNC_001897	-28.5	1525
ssc-miR-1249	LNC_001235	-28.4	396
ssc-miR-1249	LNC_001412	-27.7	642
ssc-miR-1249	LNC_002289	-27.2	345
ssc-miR-1249	LNC_002290	-26	311
ssc-miR-1249	LNC_002331	-25.9	317
ssc-miR-1249	LNC_000926	-24.7	1285
ssc-miR-1249	LNC_001588	-24.3	554
ssc-miR-1249	LNC_002276	-24	1353
ssc-miR-1249	LNC_001375	-23.5	708
ssc-miR-1249	LNC_000298	-23.1	4010
ssc-miR-1249	LNC_000994	-22.7	2211
ssc-miR-124a	LNC_001346	-29.8	1975
ssc-miR-124a	ALDBSSCT0000009539	-28	486
ssc-miR-124a	LNC_000261	-27.6	225
ssc-miR-124a	LNC_002450	-27.6	2023
ssc-miR-124a	LNC_000994	-27.1	7
ssc-miR-124a	LNC_001235	-24.5	749
ssc-miR-124a	LNC_001432	-23.5	4161
ssc-miR-124a	LNC_000226	-22.1	563
ssc-miR-124a	ALDBSSCT0000001449	-20.9	84
ssc-miR-124a	LNC_000962	-20.7	372
ssc-miR-124a	LNC_002279	-20.2	255
ssc-miR-124a	LNC_000504	-20	1
ssc-miR-125a	LNC_001995	-34.7	181
ssc-miR-125a	LNC_002345	-31.1	109
ssc-miR-125a	LNC_000994	-29.1	2913
ssc-miR-125a	LNC_001346	-28.8	1254
ssc-miR-125a	LNC_001373	-28.5	148
ssc-miR-125a	LNC_001235	-28.4	3253
ssc-miR-125a	LNC_000261	-28.3	2157
ssc-miR-125a	LNC_000504	-28.2	210
ssc-miR-125a	LNC_002276	-27.9	766
ssc-miR-125a	ALDBSSCT0000003459	-27.9	792
ssc-miR-125a	LNC_001374	-26.6	706
ssc-miR-125a	LNC_001375	-26.6	706
ssc-miR-125a	LNC_001987	-26	129
ssc-miR-125a	LNC_000962	-25.8	972
ssc-miR-125a	LNC_002272	-24.9	4688
ssc-miR-125a	LNC_000303	-24.4	1410
ssc-miR-125a	LNC_001602	-24.3	3305
ssc-miR-125a	LNC_002450	-24.1	830
ssc-miR-125a	LNC_001432	-23.9	4247
ssc-miR-125a	LNC_001590	-23.8	934
ssc-miR-125a	LNC_002280	-23.7	395
ssc-miR-125a	LNC_002328	-23.7	104
ssc-miR-125a	LNC_002332	-23.6	128
ssc-miR-125a	LNC_000236	-23.3	362
ssc-miR-125a	LNC_001096	-23.3	2463
ssc-miR-125a	LNC_000708	-21.8	337
ssc-miR-125a	LNC_002309	-21.7	202
ssc-miR-125a	LNC_002279	-20.8	466
ssc-miR-125a	LNC_001053	-20.5	102
ssc-miR-125a	LNC_000298	-20	2659
ssc-miR-125b	LNC_001995	-30.9	181
ssc-miR-125b	LNC_001373	-28.3	148
ssc-miR-125b	LNC_001346	-27	1240
ssc-miR-125b	LNC_002272	-26.7	4685
ssc-miR-125b	LNC_002345	-26.6	107
ssc-miR-125b	LNC_000261	-26.6	2157
ssc-miR-125b	LNC_001235	-26.4	3263
ssc-miR-125b	LNC_001432	-26.2	1769
ssc-miR-125b	LNC_000994	-26	2913
ssc-miR-125b	LNC_000504	-25.9	210
ssc-miR-125b	LNC_002276	-25.8	766
ssc-miR-125b	LNC_001987	-25.6	131
ssc-miR-125b	LNC_001374	-24.6	706
ssc-miR-125b	LNC_001375	-24.6	706
ssc-miR-125b	LNC_002450	-23.9	830
ssc-miR-125b	LNC_000303	-23.7	330
ssc-miR-125b	ALDBSSCT0000003459	-23.5	796
ssc-miR-125b	LNC_002280	-23.3	393
ssc-miR-125b	LNC_000236	-23.3	361
ssc-miR-125b	LNC_002328	-23.3	102
ssc-miR-125b	LNC_002309	-22.5	209
ssc-miR-125b	LNC_000962	-22.5	970
ssc-miR-125b	LNC_001602	-21.6	3154
ssc-miR-125b	LNC_001590	-21.5	926
ssc-miR-125b	LNC_002290	-21.1	291
ssc-miR-125b	LNC_002289	-21.1	325
ssc-miR-125b	LNC_001096	-20.4	2468
ssc-miR-125b	LNC_000708	-20.1	335
ssc-miR-126-3p	LNC_002300	-26.4	91
ssc-miR-126-3p	LNC_002345	-23.8	55
ssc-miR-126-3p	LNC_002065	-23.3	330
ssc-miR-126-3p	LNC_001346	-22.1	2488
ssc-miR-126-5p	LNC_000303	-20.2	1678
ssc-miR-127	LNC_001590	-38.5	473
ssc-miR-127	LNC_000504	-37.3	1037
ssc-miR-127	LNC_000920	-34.9	68
ssc-miR-127	LNC_002276	-34.3	1994
ssc-miR-127	LNC_000362	-34.3	1
ssc-miR-127	LNC_000740	-34.1	255
ssc-miR-127	LNC_002065	-33	115
ssc-miR-127	LNC_000298	-32.9	42
ssc-miR-127	LNC_002286	-32.6	35
ssc-miR-127	LNC_000926	-31.2	142
ssc-miR-127	LNC_000261	-30.8	758
ssc-miR-127	LNC_000374	-30.7	407
ssc-miR-127	LNC_001602	-30.5	2916
ssc-miR-127	LNC_002378	-30.5	72
ssc-miR-127	LNC_000070	-30.5	70
ssc-miR-127	LNC_000044	-30.5	36
ssc-miR-127	LNC_002044	-30.5	201
ssc-miR-127	LNC_000370	-30.5	11
ssc-miR-127	LNC_002331	-30.4	88
ssc-miR-127	LNC_000303	-30.4	729
ssc-miR-127	LNC_002279	-30.3	1109
ssc-miR-127	LNC_001432	-30.3	1263
ssc-miR-127	LNC_002309	-30.2	301
ssc-miR-127	LNC_001346	-30.1	3381
ssc-miR-127	LNC_001646	-30.1	288
ssc-miR-127	LNC_001235	-30.1	1697
ssc-miR-127	LNC_000550	-29.9	49
ssc-miR-127	ALDBSSCT0000001463	-29.6	1893
ssc-miR-127	LNC_001374	-29.4	272
ssc-miR-127	LNC_001375	-29.4	272
ssc-miR-127	LNC_001588	-29.2	697
ssc-miR-127	LNC_001441	-28.3	86
ssc-miR-127	LNC_002190	-27.7	392
ssc-miR-127	LNC_000415	-27.6	28
ssc-miR-127	LNC_001678	-27.2	1028
ssc-miR-127	LNC_000708	-27	1115
ssc-miR-127	LNC_000962	-26.5	348
ssc-miR-127	LNC_001241	-25.8	42
ssc-miR-127	LNC_001987	-25.7	220
ssc-miR-127	LNC_000994	-25.4	742
ssc-miR-127	LNC_002016	-24.8	1675
ssc-miR-127	LNC_002349	-24.8	114
ssc-miR-127	LNC_001623	-24.5	74
ssc-miR-127	LNC_000486	-24.5	75
ssc-miR-127	LNC_001222	-24.3	90
ssc-miR-127	LNC_001738	-23.5	105
ssc-miR-127	LNC_000338	-23.5	84
ssc-miR-127	LNC_000629	-23.5	32
ssc-miR-127	LNC_002272	-22.1	175
ssc-miR-127	LNC_000068	-21.9	854
ssc-miR-127	LNC_000126	-21.5	33
ssc-miR-127	LNC_000797	-21.5	16
ssc-miR-127	LNC_002280	-21.3	754
ssc-miR-127	LNC_001444	-21.2	343
ssc-miR-127	LNC_001493	-20.9	2
ssc-miR-127	LNC_002328	-20.7	462
ssc-miR-127	LNC_002449	-20.5	387
ssc-miR-1271-3p	LNC_001346	-32.4	1450
ssc-miR-1271-3p	LNC_000261	-31.9	1249
ssc-miR-1271-3p	LNC_001235	-31.2	565
ssc-miR-1271-3p	LNC_002272	-29	3655
ssc-miR-1271-3p	LNC_001588	-28.4	76
ssc-miR-1271-3p	LNC_001897	-27.6	271
ssc-miR-1271-3p	LNC_000994	-27.3	2165
ssc-miR-1271-3p	ALDBSSCT0000001463	-27.3	1111
ssc-miR-1271-3p	LNC_000303	-27.2	1481
ssc-miR-1271-3p	LNC_001520	-26.8	1099
ssc-miR-1271-3p	LNC_002331	-26.6	65
ssc-miR-1271-3p	LNC_000504	-26.5	92
ssc-miR-1271-3p	LNC_002190	-26.5	495
ssc-miR-1271-3p	LNC_002276	-26.1	280
ssc-miR-1271-3p	LNC_001602	-26	3223
ssc-miR-1271-3p	LNC_002332	-26	414
ssc-miR-1271-3p	LNC_000298	-26	3454
ssc-miR-1271-3p	LNC_001589	-25.8	96
ssc-miR-1271-3p	LNC_000415	-25.5	106
ssc-miR-1271-3p	LNC_001412	-25.4	771
ssc-miR-1271-3p	LNC_000499	-25.3	393
ssc-miR-1271-3p	LNC_000926	-25	139
ssc-miR-1271-3p	LNC_001110	-24.8	150
ssc-miR-1271-3p	LNC_001432	-24.7	1836
ssc-miR-1271-3p	LNC_000920	-24.7	65
ssc-miR-1271-3p	LNC_002300	-24.5	8
ssc-miR-1271-3p	LNC_001444	-24.4	48
ssc-miR-1271-3p	LNC_002450	-24.3	945
ssc-miR-1271-3p	LNC_000797	-23.9	30
ssc-miR-1271-3p	LNC_000044	-23.8	33
ssc-miR-1271-3p	LNC_002016	-23.6	881
ssc-miR-1271-3p	LNC_001096	-23.3	2377
ssc-miR-1271-3p	LNC_001678	-23.1	1756
ssc-miR-1271-3p	LNC_000962	-23.1	786
ssc-miR-1271-3p	ALDBSSCT0000003459	-23.1	119
ssc-miR-1271-3p	LNC_002308	-23	370
ssc-miR-1271-3p	LNC_001374	-22.7	462
ssc-miR-1271-3p	LNC_002339	-22.7	175
ssc-miR-1271-3p	LNC_001375	-22.7	462
ssc-miR-1271-3p	LNC_000362	-22.7	1
ssc-miR-1271-3p	LNC_001312	-22.7	2
ssc-miR-1271-3p	LNC_000719	-22.4	404
ssc-miR-1271-3p	LNC_001590	-21.8	470
ssc-miR-1271-3p	LNC_000126	-21.3	47
ssc-miR-1271-3p	LNC_001217	-20.9	445
ssc-miR-1271-3p	LNC_000572	-20.7	239
ssc-miR-1271-3p	LNC_002277	-20.4	1166
ssc-miR-1271-3p	LNC_001738	-20.1	129
ssc-miR-1271-3p	LNC_000338	-20.1	108
ssc-miR-1271-3p	LNC_000629	-20.1	56
ssc-miR-1271-3p	LNC_002065	-20.1	114
ssc-miR-1271-3p	LNC_000374	-20	408
ssc-miR-1271-5p	LNC_001096	-30.2	2475
ssc-miR-1271-5p	LNC_001346	-27.7	1805
ssc-miR-1271-5p	LNC_002331	-26	463
ssc-miR-1271-5p	LNC_001602	-25.4	1480
ssc-miR-1271-5p	LNC_000504	-24.9	407
ssc-miR-1271-5p	LNC_001590	-24.4	587
ssc-miR-1271-5p	LNC_000962	-23.6	756
ssc-miR-1271-5p	LNC_002276	-23.4	1709
ssc-miR-1271-5p	LNC_001646	-23.1	111
ssc-miR-1271-5p	LNC_000068	-23.1	202
ssc-miR-1271-5p	LNC_002190	-22.9	341
ssc-miR-1271-5p	LNC_001520	-22.8	1195
ssc-miR-1271-5p	LNC_000298	-22.3	1004
ssc-miR-1271-5p	LNC_001235	-21.9	883
ssc-miR-1271-5p	LNC_001995	-21.8	314
ssc-miR-1271-5p	LNC_002272	-21.5	435
ssc-miR-1271-5p	LNC_001374	-21.5	658
ssc-miR-1271-5p	LNC_001375	-21.5	658
ssc-miR-1271-5p	LNC_002449	-21.4	320
ssc-miR-1271-5p	LNC_000303	-21.4	1621
ssc-miR-1271-5p	LNC_002016	-21.2	278
ssc-miR-1271-5p	ALDBSSCT0000001463	-21.1	899
ssc-miR-1271-5p	LNC_000261	-20.2	43
ssc-miR-1277	LNC_002449	-21.9	109
ssc-miR-128	LNC_000298	-30.2	1082
ssc-miR-128	LNC_000926	-25.8	160
ssc-miR-128	LNC_000994	-25.7	315
ssc-miR-128	LNC_000504	-23.6	524
ssc-miR-128	LNC_001375	-23.5	877
ssc-miR-128	ENSSSCT00000037405	-23.3	125
ssc-miR-128	LNC_002279	-23.1	1128
ssc-miR-128	LNC_000374	-23.1	425
ssc-miR-128	LNC_000044	-23.1	92
ssc-miR-128	LNC_001602	-22.3	1314
ssc-miR-128	LNC_001738	-22.1	197
ssc-miR-128	LNC_001110	-22.1	17
ssc-miR-128	LNC_001493	-22.1	91
ssc-miR-128	LNC_001374	-21.9	979
ssc-miR-128	LNC_000797	-21.5	108
ssc-miR-128	LNC_000629	-21.5	124
ssc-miR-128	LNC_002065	-21.5	182
ssc-miR-128	LNC_001536	-21.4	17
ssc-miR-128	LNC_002450	-21.1	1498
ssc-miR-128	LNC_000126	-20.8	114
ssc-miR-128	LNC_000572	-20.8	59
ssc-miR-128	LNC_000338	-20.8	165
ssc-miR-128	LNC_000686	-20.8	19
ssc-miR-128	LNC_002286	-20.6	91
ssc-miR-128	LNC_002272	-20.5	3139
ssc-miR-128	LNC_000303	-20.5	1528
ssc-miR-128	LNC_001432	-20.4	3915
ssc-miR-1285	LNC_002190	-33.7	469
ssc-miR-1285	LNC_001346	-30.6	3660
ssc-miR-1285	LNC_000994	-30.5	1618
ssc-miR-1285	LNC_002339	-30.1	97
ssc-miR-1285	LNC_001678	-30.1	1311
ssc-miR-1285	LNC_001235	-29.9	1976
ssc-miR-1285	LNC_000187	-29.1	277
ssc-miR-1285	LNC_002276	-29	1086
ssc-miR-1285	LNC_001432	-28.9	1666
ssc-miR-1285	LNC_002349	-27.8	9
ssc-miR-1285	LNC_001588	-27.3	215
ssc-miR-1285	LNC_002309	-27.2	605
ssc-miR-1285	LNC_002065	-26.7	100
ssc-miR-1285	LNC_001738	-26.6	115
ssc-miR-1285	LNC_000338	-26.6	94
ssc-miR-1285	LNC_000926	-26.6	1524
ssc-miR-1285	LNC_000629	-26.6	42
ssc-miR-1285	LNC_000126	-26.5	43
ssc-miR-1285	LNC_002450	-26.4	1
ssc-miR-1285	LNC_000797	-26.3	26
ssc-miR-1285	LNC_000298	-25.8	4061
ssc-miR-1285	LNC_002277	-25.5	1208
ssc-miR-1285	LNC_001493	-24.8	10
ssc-miR-1285	LNC_000303	-24.6	1366
ssc-miR-1285	LNC_002272	-24.5	4748
ssc-miR-1285	LNC_001441	-24.2	237
ssc-miR-1285	LNC_002279	-24.1	1093
ssc-miR-1285	LNC_001602	-24	2356
ssc-miR-1285	LNC_002280	-23.8	2325
ssc-miR-1285	LNC_002328	-23.8	2198
ssc-miR-1285	LNC_001374	-23.1	1172
ssc-miR-1285	LNC_000920	-22.1	56
ssc-miR-1285	LNC_001412	-21.8	956
ssc-miR-1285	ALDBSSCT0000001463	-21.8	457
ssc-miR-1285	LNC_002016	-21.3	28
ssc-miR-1285	LNC_001053	-20.6	253
ssc-miR-1285	LNC_001096	-20.4	589
ssc-miR-1296-3p	LNC_000303	-31.8	1526
ssc-miR-1296-3p	LNC_001373	-30.1	23
ssc-miR-1296-3p	LNC_002016	-29.9	1646
ssc-miR-1296-3p	LNC_001493	-29.8	5
ssc-miR-1296-3p	LNC_001432	-29.6	1628
ssc-miR-1296-3p	LNC_002276	-29.5	547
ssc-miR-1296-3p	LNC_002279	-29.3	1090
ssc-miR-1296-3p	LNC_000926	-29.3	817
ssc-miR-1296-3p	LNC_001588	-28.5	414
ssc-miR-1296-3p	ALDBSSCT0000001449	-28.5	253
ssc-miR-1296-3p	LNC_002286	-27.5	16
ssc-miR-1296-3p	LNC_001590	-27.4	340
ssc-miR-1296-3p	LNC_001444	-27.2	462
ssc-miR-1296-3p	LNC_001235	-26.8	2157
ssc-miR-1296-3p	LNC_000044	-26.6	17
ssc-miR-1296-3p	LNC_002272	-26.3	2156
ssc-miR-1296-3p	LNC_001412	-26.3	531
ssc-miR-1296-3p	LNC_000994	-25.8	2233
ssc-miR-1296-3p	LNC_001738	-25.6	111
ssc-miR-1296-3p	LNC_000126	-25.6	39
ssc-miR-1296-3p	LNC_000338	-25.6	90
ssc-miR-1296-3p	LNC_000797	-25.6	22
ssc-miR-1296-3p	LNC_000629	-25.6	38
ssc-miR-1296-3p	LNC_001374	-25.3	1375
ssc-miR-1296-3p	LNC_002309	-25.3	28
ssc-miR-1296-3p	LNC_001346	-24.4	3712
ssc-miR-1296-3p	LNC_000068	-24.2	655
ssc-miR-1296-3p	LNC_001587	-24	267
ssc-miR-1296-3p	LNC_000415	-23.9	124
ssc-miR-1296-3p	LNC_002292	-23.7	425
ssc-miR-1296-3p	LNC_002308	-23.7	324
ssc-miR-1296-3p	LNC_001678	-23.7	2048
ssc-miR-1296-3p	LNC_002331	-23.7	258
ssc-miR-1296-3p	ALDBSSCT0000001463	-23.5	453
ssc-miR-1296-3p	LNC_002277	-23.3	1177
ssc-miR-1296-3p	LNC_002065	-23.2	103
ssc-miR-1296-3p	LNC_001217	-23	16
ssc-miR-1296-3p	LNC_000236	-22.9	191
ssc-miR-1296-3p	LNC_002450	-22.9	483
ssc-miR-1296-3p	LNC_002328	-22.9	2593
ssc-miR-1296-3p	LNC_002323	-22.8	86
ssc-miR-1296-3p	LNC_001602	-22.3	4635
ssc-miR-1296-3p	LNC_001110	-22.3	354
ssc-miR-1296-3p	LNC_001096	-22.2	1440
ssc-miR-1296-3p	ALDBSSCT0000009539	-22.1	578
ssc-miR-1296-3p	LNC_002337	-21.9	466
ssc-miR-1296-3p	LNC_000962	-21.8	243
ssc-miR-1296-3p	LNC_000374	-21.8	394
ssc-miR-1296-3p	LNC_002280	-21.6	2254
ssc-miR-1296-3p	LNC_000261	-21.1	1953
ssc-miR-1296-3p	LNC_000298	-21.1	2988
ssc-miR-1296-3p	LNC_000920	-21	56
ssc-miR-1296-3p	LNC_000881	-20.8	20
ssc-miR-1296-3p	LNC_001241	-20.7	216
ssc-miR-1296-3p	LNC_002284	-20.6	21
ssc-miR-1296-3p	ALDBSSCT0000003459	-20.6	710
ssc-miR-1296-3p	LNC_002289	-20.3	491
ssc-miR-1296-3p	LNC_001897	-20.3	1034
ssc-miR-1296-3p	LNC_001987	-20.1	232
ssc-miR-1296-5p	LNC_001235	-36.9	2728
ssc-miR-1296-5p	LNC_000261	-36.6	834
ssc-miR-1296-5p	LNC_001432	-36.4	482
ssc-miR-1296-5p	LNC_000994	-35.1	2028
ssc-miR-1296-5p	LNC_002308	-34.2	434
ssc-miR-1296-5p	LNC_001520	-34	1258
ssc-miR-1296-5p	LNC_002272	-33.8	14
ssc-miR-1296-5p	LNC_001602	-33.4	964
ssc-miR-1296-5p	LNC_000926	-31.8	224
ssc-miR-1296-5p	LNC_002450	-30.6	1375
ssc-miR-1296-5p	LNC_000499	-30.2	116
ssc-miR-1296-5p	LNC_002276	-29.7	547
ssc-miR-1296-5p	LNC_000504	-29.2	138
ssc-miR-1296-5p	LNC_001346	-28.9	1375
ssc-miR-1296-5p	LNC_002300	-28.8	145
ssc-miR-1296-5p	LNC_002016	-28.4	1364
ssc-miR-1296-5p	LNC_000236	-28.4	521
ssc-miR-1296-5p	LNC_001588	-28.1	1
ssc-miR-1296-5p	LNC_001412	-28.1	720
ssc-miR-1296-5p	LNC_000226	-27.8	157
ssc-miR-1296-5p	LNC_002345	-27.6	366
ssc-miR-1296-5p	LNC_000708	-27.5	439
ssc-miR-1296-5p	LNC_001217	-27.5	1
ssc-miR-1296-5p	LNC_001646	-27	90
ssc-miR-1296-5p	LNC_001897	-26.6	1679
ssc-miR-1296-5p	LNC_000686	-26.5	112
ssc-miR-1296-5p	LNC_000044	-26.2	188
ssc-miR-1296-5p	LNC_002280	-26	713
ssc-miR-1296-5p	LNC_001300	-26	121
ssc-miR-1296-5p	ALDBSSCT0000001463	-25.6	451
ssc-miR-1296-5p	LNC_002279	-25.4	1090
ssc-miR-1296-5p	LNC_002332	-25.3	86
ssc-miR-1296-5p	LNC_001587	-25.3	9
ssc-miR-1296-5p	ALDBSSCT0000003459	-25.2	226
ssc-miR-1296-5p	LNC_001374	-25.1	821
ssc-miR-1296-5p	LNC_002065	-25	247
ssc-miR-1296-5p	LNC_001678	-24.8	829
ssc-miR-1296-5p	LNC_002277	-24.6	1203
ssc-miR-1296-5p	LNC_001444	-24.6	132
ssc-miR-1296-5p	LNC_001312	-24.3	68
ssc-miR-1296-5p	LNC_000629	-23.6	124
ssc-miR-1296-5p	LNC_001096	-23.2	1621
ssc-miR-1296-5p	LNC_000415	-23.2	9
ssc-miR-1296-5p	LNC_001536	-23	12
ssc-miR-1296-5p	LNC_002328	-22.9	422
ssc-miR-1296-5p	LNC_002337	-22.8	347
ssc-miR-1296-5p	LNC_002331	-22.7	588
ssc-miR-1296-5p	LNC_001711	-22.2	77
ssc-miR-1296-5p	LNC_000338	-22.2	176
ssc-miR-1296-5p	LNC_000572	-22.1	65
ssc-miR-1296-5p	LNC_000298	-21.5	2980
ssc-miR-1296-5p	LNC_000920	-21.5	55
ssc-miR-1296-5p	LNC_001738	-21.4	197
ssc-miR-1296-5p	LNC_000126	-21.4	125
ssc-miR-1296-5p	LNC_000797	-21.4	108
ssc-miR-1296-5p	LNC_001493	-21.4	91
ssc-miR-1296-5p	LNC_000362	-20.5	423
ssc-miR-1296-5p	LNC_001222	-20.4	250
ssc-miR-1296-5p	LNC_000033	-20.2	1
ssc-miR-1296-5p	LNC_001995	-20	288
ssc-miR-129a-3p	LNC_001346	-32.8	818
ssc-miR-129a-3p	LNC_000926	-29	1294
ssc-miR-129a-3p	LNC_001678	-28.4	137
ssc-miR-129a-3p	LNC_001602	-28.1	3687
ssc-miR-129a-3p	LNC_000261	-28	828
ssc-miR-129a-3p	LNC_001235	-28	401
ssc-miR-129a-3p	LNC_002349	-26.8	121
ssc-miR-129a-3p	LNC_002309	-26.7	10
ssc-miR-129a-3p	LNC_001412	-26.4	802
ssc-miR-129a-3p	LNC_001374	-26.3	1455
ssc-miR-129a-3p	LNC_000044	-25.4	114
ssc-miR-129a-3p	LNC_000298	-24.1	2515
ssc-miR-129a-3p	LNC_000504	-23	207
ssc-miR-129a-3p	LNC_002272	-22.7	610
ssc-miR-129a-3p	LNC_000236	-22.6	344
ssc-miR-129a-3p	LNC_000070	-22.5	11
ssc-miR-129a-3p	LNC_000303	-22.2	204
ssc-miR-129a-3p	LNC_002276	-21.9	2075
ssc-miR-129a-3p	LNC_001995	-21.8	42
ssc-miR-129a-3p	ALDBSSCT0000001449	-21.3	189
ssc-miR-129a-3p	LNC_001096	-20.2	2097
ssc-miR-129a-5p	LNC_000962	-32.2	817
ssc-miR-129a-5p	LNC_000261	-32	1083
ssc-miR-129a-5p	LNC_001432	-31.9	253
ssc-miR-129a-5p	LNC_001346	-30.2	2304
ssc-miR-129a-5p	LNC_001235	-30.2	620
ssc-miR-129a-5p	LNC_002272	-29.4	5229
ssc-miR-129a-5p	LNC_000881	-29.4	302
ssc-miR-129a-5p	LNC_001412	-29.1	74
ssc-miR-129a-5p	LNC_002280	-28.5	21
ssc-miR-129a-5p	LNC_002016	-27.8	1053
ssc-miR-129a-5p	LNC_002308	-27.7	423
ssc-miR-129a-5p	LNC_000926	-27.5	808
ssc-miR-129a-5p	LNC_001995	-27.4	196
ssc-miR-129a-5p	LNC_000362	-27.4	160
ssc-miR-129a-5p	LNC_001678	-27.3	1481
ssc-miR-129a-5p	LNC_001493	-27.3	179
ssc-miR-129a-5p	LNC_001588	-27.2	91
ssc-miR-129a-5p	LNC_002279	-26.9	1266
ssc-miR-129a-5p	LNC_002328	-26.6	2646
ssc-miR-129a-5p	LNC_000686	-26.5	118
ssc-miR-129a-5p	LNC_000226	-26.2	160
ssc-miR-129a-5p	LNC_000298	-26.2	1763
ssc-miR-129a-5p	LNC_002332	-26.1	494
ssc-miR-129a-5p	LNC_000338	-26.1	258
ssc-miR-129a-5p	LNC_000629	-26.1	206
ssc-miR-129a-5p	LNC_001374	-26	1281
ssc-miR-129a-5p	LNC_002450	-26	1015
ssc-miR-129a-5p	LNC_001987	-25.9	100
ssc-miR-129a-5p	LNC_001520	-25.8	976
ssc-miR-129a-5p	LNC_001300	-25.7	129
ssc-miR-129a-5p	LNC_001312	-25.4	156
ssc-miR-129a-5p	LNC_001602	-25	3476
ssc-miR-129a-5p	LNC_002331	-25	81
ssc-miR-129a-5p	LNC_000797	-25	196
ssc-miR-129a-5p	LNC_001536	-25	195
ssc-miR-129a-5p	LNC_002339	-24.9	451
ssc-miR-129a-5p	LNC_001897	-24.5	559
ssc-miR-129a-5p	LNC_002289	-24.4	337
ssc-miR-129a-5p	LNC_001738	-24.4	257
ssc-miR-129a-5p	LNC_000033	-24.4	52
ssc-miR-129a-5p	LNC_002001	-24.3	167
ssc-miR-129a-5p	LNC_000504	-24	163
ssc-miR-129a-5p	LNC_000499	-23.9	110
ssc-miR-129a-5p	LNC_000994	-23.8	1636
ssc-miR-129a-5p	LNC_001590	-23.6	1631
ssc-miR-129a-5p	LNC_002292	-23.4	1026
ssc-miR-129a-5p	LNC_000572	-23.4	152
ssc-miR-129a-5p	LNC_000044	-23.3	163
ssc-miR-129a-5p	LNC_000303	-23.3	1175
ssc-miR-129a-5p	LNC_001373	-23.1	404
ssc-miR-129a-5p	LNC_002300	-22.8	184
ssc-miR-129a-5p	LNC_000236	-22.2	650
ssc-miR-129a-5p	LNC_000126	-21.8	185
ssc-miR-129a-5p	LNC_001053	-21.7	322
ssc-miR-129a-5p	LNC_000187	-21.6	424
ssc-miR-129a-5p	LNC_002286	-21.3	190
ssc-miR-129a-5p	ALDBSSCT0000001463	-21.1	2922
ssc-miR-129a-5p	LNC_001441	-20.9	327
ssc-miR-129a-5p	LNC_002345	-20.8	200
ssc-miR-129a-5p	LNC_000708	-20.7	20
ssc-miR-129a-5p	LNC_001096	-20.7	2451
ssc-miR-129a-5p	LNC_000068	-20.6	293
ssc-miR-129a-5p	ALDBSSCT0000003459	-20.6	488
ssc-miR-129a-5p	LNC_001375	-20.4	846
ssc-miR-129a-5p	LNC_000374	-20.3	105
ssc-miR-129b	LNC_000962	-32.2	817
ssc-miR-129b	LNC_000261	-32	1083
ssc-miR-129b	LNC_001432	-31.9	253
ssc-miR-129b	LNC_001346	-30.2	2304
ssc-miR-129b	LNC_001235	-30.2	620
ssc-miR-129b	LNC_002272	-29.4	5229
ssc-miR-129b	LNC_000881	-29.4	302
ssc-miR-129b	LNC_001412	-29.1	74
ssc-miR-129b	LNC_002280	-28.5	21
ssc-miR-129b	LNC_002016	-27.8	1053
ssc-miR-129b	LNC_002308	-27.7	423
ssc-miR-129b	LNC_000926	-27.5	808
ssc-miR-129b	LNC_001995	-27.4	196
ssc-miR-129b	LNC_000362	-27.4	160
ssc-miR-129b	LNC_001678	-27.3	1481
ssc-miR-129b	LNC_001493	-27.3	179
ssc-miR-129b	LNC_001588	-27.2	91
ssc-miR-129b	LNC_002279	-26.9	1266
ssc-miR-129b	LNC_002328	-26.6	2646
ssc-miR-129b	LNC_000686	-26.5	118
ssc-miR-129b	LNC_000226	-26.2	160
ssc-miR-129b	LNC_000298	-26.2	1763
ssc-miR-129b	LNC_002332	-26.1	494
ssc-miR-129b	LNC_000338	-26.1	258
ssc-miR-129b	LNC_000629	-26.1	206
ssc-miR-129b	LNC_001374	-26	1281
ssc-miR-129b	LNC_002450	-26	1015
ssc-miR-129b	LNC_001987	-25.9	100
ssc-miR-129b	LNC_001520	-25.8	976
ssc-miR-129b	LNC_001300	-25.7	129
ssc-miR-129b	LNC_001312	-25.4	156
ssc-miR-129b	LNC_001602	-25	3476
ssc-miR-129b	LNC_002331	-25	81
ssc-miR-129b	LNC_000797	-25	196
ssc-miR-129b	LNC_001536	-25	195
ssc-miR-129b	LNC_002339	-24.9	451
ssc-miR-129b	LNC_001897	-24.5	559
ssc-miR-129b	LNC_002289	-24.4	337
ssc-miR-129b	LNC_001738	-24.4	257
ssc-miR-129b	LNC_000033	-24.4	52
ssc-miR-129b	LNC_002001	-24.3	167
ssc-miR-129b	LNC_000504	-24	163
ssc-miR-129b	LNC_000499	-23.9	110
ssc-miR-129b	LNC_000994	-23.8	1636
ssc-miR-129b	LNC_001590	-23.6	1631
ssc-miR-129b	LNC_002292	-23.4	1026
ssc-miR-129b	LNC_000572	-23.4	152
ssc-miR-129b	LNC_000044	-23.3	163
ssc-miR-129b	LNC_000303	-23.3	1175
ssc-miR-129b	LNC_001373	-23.1	404
ssc-miR-129b	LNC_002300	-22.8	184
ssc-miR-129b	LNC_000236	-22.2	650
ssc-miR-129b	LNC_000126	-21.8	185
ssc-miR-129b	LNC_001053	-21.7	322
ssc-miR-129b	LNC_000187	-21.6	424
ssc-miR-129b	LNC_002286	-21.3	190
ssc-miR-129b	ALDBSSCT0000001463	-21.1	2922
ssc-miR-129b	LNC_001441	-20.9	327
ssc-miR-129b	LNC_002345	-20.8	200
ssc-miR-129b	LNC_000708	-20.7	20
ssc-miR-129b	LNC_001096	-20.7	2451
ssc-miR-129b	LNC_000068	-20.6	293
ssc-miR-129b	ALDBSSCT0000003459	-20.6	488
ssc-miR-129b	LNC_001375	-20.4	846
ssc-miR-129b	LNC_000374	-20.3	105
ssc-miR-1306-3p	LNC_000926	-32.9	857
ssc-miR-1306-3p	LNC_001346	-30.9	210
ssc-miR-1306-3p	LNC_001235	-30.8	555
ssc-miR-1306-3p	LNC_001590	-28.1	109
ssc-miR-1306-3p	LNC_000261	-28.1	2122
ssc-miR-1306-3p	LNC_002272	-28	413
ssc-miR-1306-3p	LNC_000298	-27.7	1500
ssc-miR-1306-3p	LNC_001602	-27.5	3627
ssc-miR-1306-3p	LNC_000499	-26.5	20
ssc-miR-1306-3p	LNC_000994	-25.8	714
ssc-miR-1306-3p	LNC_002345	-25.7	19
ssc-miR-1306-3p	LNC_002276	-25.6	2182
ssc-miR-1306-3p	LNC_001432	-24.9	1063
ssc-miR-1306-3p	LNC_001588	-24.7	206
ssc-miR-1306-3p	LNC_002190	-24.6	393
ssc-miR-1306-3p	LNC_002016	-24.5	1551
ssc-miR-1306-3p	LNC_002001	-24.3	288
ssc-miR-1306-3p	LNC_001412	-24.1	783
ssc-miR-1306-3p	LNC_002309	-24	355
ssc-miR-1306-3p	LNC_000881	-24	330
ssc-miR-1306-3p	LNC_000362	-23.7	82
ssc-miR-1306-3p	LNC_001897	-23.6	1494
ssc-miR-1306-3p	LNC_002328	-23.4	2712
ssc-miR-1306-3p	LNC_001678	-23.3	1265
ssc-miR-1306-3p	LNC_001738	-23.3	69
ssc-miR-1306-3p	LNC_000338	-23.3	48
ssc-miR-1306-3p	LNC_002065	-23.3	54
ssc-miR-1306-3p	LNC_002300	-22.9	27
ssc-miR-1306-3p	LNC_000740	-22.8	237
ssc-miR-1306-3p	LNC_002280	-22.2	1322
ssc-miR-1306-3p	LNC_000126	-22.2	52
ssc-miR-1306-3p	LNC_001096	-22.2	799
ssc-miR-1306-3p	LNC_000629	-22.2	51
ssc-miR-1306-3p	LNC_001312	-22	76
ssc-miR-1306-3p	LNC_001493	-22	18
ssc-miR-1306-3p	LNC_001646	-21.8	1
ssc-miR-1306-3p	LNC_002279	-21.5	1052
ssc-miR-1306-3p	LNC_000797	-21.5	35
ssc-miR-1306-3p	LNC_000572	-21.2	3
ssc-miR-1306-3p	LNC_000962	-20.9	491
ssc-miR-1306-3p	ALDBSSCT0000001463	-20.9	821
ssc-miR-1306-3p	LNC_000187	-20.8	188
ssc-miR-1306-3p	LNC_001110	-20.8	133
ssc-miR-1306-3p	ENSSSCT00000037405	-20.5	114
ssc-miR-1306-3p	LNC_000920	-20	7
ssc-miR-1306-5p	LNC_001346	-39.1	812
ssc-miR-1306-5p	LNC_000261	-35.2	1111
ssc-miR-1306-5p	LNC_001602	-32.7	426
ssc-miR-1306-5p	LNC_001412	-32	514
ssc-miR-1306-5p	LNC_001235	-31.2	98
ssc-miR-1306-5p	LNC_000504	-30.9	1
ssc-miR-1306-5p	LNC_000926	-29.8	1290
ssc-miR-1306-5p	LNC_000994	-29.2	2223
ssc-miR-1306-5p	LNC_000236	-28.4	660
ssc-miR-1306-5p	LNC_002450	-27.8	621
ssc-miR-1306-5p	LNC_001995	-25.9	313
ssc-miR-1306-5p	LNC_002272	-24.5	1239
ssc-miR-1306-5p	LNC_002190	-23.3	329
ssc-miR-1306-5p	LNC_001678	-22.2	315
ssc-miR-1306-5p	LNC_000708	-22.1	959
ssc-miR-1307	LNC_001432	-35.4	517
ssc-miR-1307	LNC_001346	-33.9	225
ssc-miR-1307	LNC_002328	-31.8	2658
ssc-miR-1307	LNC_002345	-31.5	34
ssc-miR-1307	LNC_001646	-31.4	406
ssc-miR-1307	LNC_002016	-30.3	584
ssc-miR-1307	LNC_002331	-30.2	489
ssc-miR-1307	LNC_001590	-30	1762
ssc-miR-1307	LNC_002276	-29.4	866
ssc-miR-1307	LNC_000298	-29	4009
ssc-miR-1307	ALDBSSCT0000001463	-28.2	2122
ssc-miR-1307	LNC_002280	-27.6	2518
ssc-miR-1307	LNC_000261	-27	55
ssc-miR-1307	LNC_001374	-26.9	851
ssc-miR-1307	LNC_001602	-26.2	1750
ssc-miR-1307	LNC_001711	-26.1	275
ssc-miR-1307	LNC_001235	-26	643
ssc-miR-1307	LNC_001678	-25.8	518
ssc-miR-1307	LNC_000926	-25.6	125
ssc-miR-1307	LNC_001096	-25.5	475
ssc-miR-1307	LNC_000881	-25.3	2
ssc-miR-1307	LNC_001897	-25.2	710
ssc-miR-1307	LNC_000236	-24.6	360
ssc-miR-1307	LNC_001520	-24.5	535
ssc-miR-1307	LNC_001373	-24	560
ssc-miR-1307	LNC_002272	-23.8	435
ssc-miR-1307	ENSSSCT00000037405	-23.8	1
ssc-miR-1307	LNC_002308	-23.4	370
ssc-miR-1307	ALDBSSCT0000003459	-23.1	670
ssc-miR-1307	LNC_000962	-23	722
ssc-miR-1307	LNC_000303	-22.8	1619
ssc-miR-1307	LNC_000504	-22.5	198
ssc-miR-1307	LNC_000994	-22.4	819
ssc-miR-1307	LNC_002279	-22.2	156
ssc-miR-1307	LNC_000708	-22	63
ssc-miR-1307	LNC_001110	-21.8	115
ssc-miR-1307	LNC_000068	-21.5	49
ssc-miR-1307	ALDBSSCT0000001449	-21.2	291
ssc-miR-1307	LNC_000740	-20.9	91
ssc-miR-130a	LNC_002276	-25.2	183
ssc-miR-130a	LNC_001646	-24.1	37
ssc-miR-130a	LNC_001678	-24.1	2377
ssc-miR-130a	LNC_000797	-22.3	255
ssc-miR-130a	LNC_000298	-22.1	590
ssc-miR-130a	LNC_002272	-21.8	2166
ssc-miR-130a	LNC_001432	-21.8	4171
ssc-miR-130a	LNC_001897	-21.6	1743
ssc-miR-130a	ALDBSSCT0000001463	-21.4	1371
ssc-miR-130a	LNC_000226	-20.1	764
ssc-miR-130b-3p	LNC_001678	-27.7	2377
ssc-miR-130b-3p	LNC_001432	-24.8	4171
ssc-miR-130b-3p	LNC_001110	-23.4	485
ssc-miR-130b-3p	LNC_002276	-23.1	176
ssc-miR-130b-3p	ALDBSSCT0000001463	-22.8	1371
ssc-miR-130b-3p	LNC_002272	-22	2166
ssc-miR-130b-3p	LNC_000298	-21.9	606
ssc-miR-130b-3p	LNC_001897	-21.5	1743
ssc-miR-130b-3p	LNC_000881	-20.6	389
ssc-miR-130b-5p	LNC_001346	-30.9	169
ssc-miR-130b-5p	LNC_001590	-28.7	1576
ssc-miR-130b-5p	LNC_002272	-28	442
ssc-miR-130b-5p	LNC_001432	-27.9	732
ssc-miR-130b-5p	LNC_001520	-27.6	1233
ssc-miR-130b-5p	LNC_000994	-27.1	574
ssc-miR-130b-5p	LNC_002450	-27.1	1038
ssc-miR-130b-5p	LNC_000303	-27	1247
ssc-miR-130b-5p	ALDBSSCT0000003459	-27	780
ssc-miR-130b-5p	LNC_001444	-26.6	356
ssc-miR-130b-5p	LNC_001235	-26.5	1293
ssc-miR-130b-5p	LNC_001374	-26.4	1248
ssc-miR-130b-5p	LNC_002016	-26.3	1346
ssc-miR-130b-5p	LNC_000236	-26.3	750
ssc-miR-130b-5p	LNC_001897	-25.9	575
ssc-miR-130b-5p	LNC_001602	-25.8	944
ssc-miR-130b-5p	LNC_000261	-25.7	512
ssc-miR-130b-5p	LNC_000504	-25.1	1333
ssc-miR-130b-5p	LNC_000926	-25.1	630
ssc-miR-130b-5p	LNC_000499	-24.5	793
ssc-miR-130b-5p	LNC_001110	-24.5	7
ssc-miR-130b-5p	LNC_001412	-24	646
ssc-miR-130b-5p	LNC_001588	-23.9	555
ssc-miR-130b-5p	LNC_001678	-23.8	236
ssc-miR-130b-5p	LNC_001375	-23.1	573
ssc-miR-130b-5p	LNC_000708	-22.8	718
ssc-miR-130b-5p	ALDBSSCT0000001463	-22.1	183
ssc-miR-130b-5p	LNC_002277	-21.8	446
ssc-miR-130b-5p	LNC_000068	-21.7	236
ssc-miR-130b-5p	LNC_000298	-21.7	2484
ssc-miR-130b-5p	LNC_002280	-21.5	1538
ssc-miR-130b-5p	LNC_000962	-21.4	927
ssc-miR-130b-5p	LNC_002328	-21.4	816
ssc-miR-130b-5p	LNC_002308	-21.3	91
ssc-miR-130b-5p	LNC_002190	-20.2	37
ssc-miR-132	LNC_001602	-29.4	3218
ssc-miR-132	LNC_002272	-28.4	4287
ssc-miR-132	LNC_000226	-23.6	513
ssc-miR-132	LNC_002450	-21.7	1506
ssc-miR-132	LNC_002449	-20.4	519
ssc-miR-133a-3p	LNC_000926	-32.7	1431
ssc-miR-133a-3p	LNC_002345	-29.6	1
ssc-miR-133a-3p	LNC_000499	-29.5	924
ssc-miR-133a-3p	LNC_001346	-29.3	863
ssc-miR-133a-3p	LNC_001602	-28.9	938
ssc-miR-133a-3p	LNC_000370	-27.6	95
ssc-miR-133a-3p	LNC_002016	-26.9	321
ssc-miR-133a-3p	LNC_002272	-26.8	608
ssc-miR-133a-3p	LNC_001235	-26.8	1849
ssc-miR-133a-3p	LNC_000708	-26.7	72
ssc-miR-133a-3p	LNC_002280	-26.3	58
ssc-miR-133a-3p	LNC_002450	-25.7	1203
ssc-miR-133a-3p	LNC_000994	-25.4	2022
ssc-miR-133a-3p	LNC_001412	-25.4	808
ssc-miR-133a-3p	LNC_002332	-25.3	152
ssc-miR-133a-3p	LNC_000504	-25.1	1307
ssc-miR-133a-3p	LNC_001374	-24.8	1457
ssc-miR-133a-3p	LNC_000415	-24.8	293
ssc-miR-133a-3p	LNC_002276	-24.4	2102
ssc-miR-133a-3p	LNC_001711	-24.4	342
ssc-miR-133a-3p	LNC_002328	-24.4	2356
ssc-miR-133a-3p	LNC_000261	-24.2	2113
ssc-miR-133a-3p	LNC_001432	-24.2	277
ssc-miR-133a-3p	LNC_000226	-24.1	341
ssc-miR-133a-3p	LNC_001590	-24	1589
ssc-miR-133a-3p	LNC_002290	-24	303
ssc-miR-133a-3p	LNC_000298	-24	2653
ssc-miR-133a-3p	LNC_001373	-23.8	20
ssc-miR-133a-3p	LNC_000044	-23.6	120
ssc-miR-133a-3p	LNC_002331	-23.5	321
ssc-miR-133a-3p	LNC_001375	-23.4	363
ssc-miR-133a-3p	LNC_002378	-23.4	156
ssc-miR-133a-3p	LNC_001222	-23.4	64
ssc-miR-133a-3p	LNC_000740	-23.4	346
ssc-miR-133a-3p	LNC_001441	-23.4	170
ssc-miR-133a-3p	LNC_000070	-23.4	154
ssc-miR-133a-3p	LNC_002044	-23.4	285
ssc-miR-133a-3p	LNC_001623	-23.4	48
ssc-miR-133a-3p	LNC_000486	-23.4	49
ssc-miR-133a-3p	LNC_000303	-23.4	808
ssc-miR-133a-3p	LNC_000374	-22.1	130
ssc-miR-133a-3p	LNC_001520	-22	1115
ssc-miR-133a-3p	LNC_000689	-21.8	146
ssc-miR-133a-3p	LNC_000187	-21.4	526
ssc-miR-133a-3p	LNC_000550	-21.1	133
ssc-miR-133a-5p	LNC_000994	-26.7	713
ssc-miR-133a-5p	LNC_001536	-23.2	383
ssc-miR-133a-5p	LNC_001053	-23	642
ssc-miR-133a-5p	LNC_001441	-22.5	62
ssc-miR-133a-5p	LNC_001346	-21.8	3594
ssc-miR-133a-5p	LNC_001235	-21.8	1910
ssc-miR-133a-5p	LNC_000572	-21.7	285
ssc-miR-133a-5p	LNC_000686	-21.6	312
ssc-miR-133a-5p	LNC_000926	-20.9	407
ssc-miR-133a-5p	LNC_000187	-20.6	375
ssc-miR-133a-5p	LNC_002309	-20.4	678
ssc-miR-133a-5p	LNC_000303	-20.4	702
ssc-miR-133a-5p	LNC_002016	-20.3	25
ssc-miR-133a-5p	LNC_000504	-20.3	884
ssc-miR-133a-5p	ALDBSSCT0000001463	-20.3	443
ssc-miR-133a-5p	LNC_001678	-20.1	225
ssc-miR-133a-5p	LNC_002331	-20.1	447
ssc-miR-133b	LNC_000298	-32.5	1331
ssc-miR-133b	LNC_002450	-32.2	1334
ssc-miR-133b	LNC_001346	-29.9	863
ssc-miR-133b	LNC_001235	-29.8	1081
ssc-miR-133b	LNC_001602	-29.1	938
ssc-miR-133b	LNC_002300	-28.9	8
ssc-miR-133b	LNC_000499	-28.5	897
ssc-miR-133b	LNC_000370	-28.2	95
ssc-miR-133b	LNC_000708	-28	72
ssc-miR-133b	LNC_001590	-27.9	485
ssc-miR-133b	LNC_002276	-27.3	1802
ssc-miR-133b	LNC_001374	-27.3	1260
ssc-miR-133b	LNC_002016	-27	322
ssc-miR-133b	LNC_001588	-26.7	152
ssc-miR-133b	LNC_000926	-26.7	1285
ssc-miR-133b	ALDBSSCT0000003459	-26.7	84
ssc-miR-133b	LNC_002272	-26.4	1161
ssc-miR-133b	LNC_000504	-26.1	1307
ssc-miR-133b	LNC_001711	-25.9	342
ssc-miR-133b	LNC_000236	-25.8	460
ssc-miR-133b	LNC_000994	-25.6	2022
ssc-miR-133b	LNC_002280	-25	59
ssc-miR-133b	LNC_000719	-24.7	98
ssc-miR-133b	LNC_000303	-24.7	1715
ssc-miR-133b	LNC_002290	-24.6	303
ssc-miR-133b	LNC_000261	-24.4	2113
ssc-miR-133b	LNC_001375	-24.3	363
ssc-miR-133b	LNC_002328	-24.2	2357
ssc-miR-133b	LNC_002378	-24	156
ssc-miR-133b	LNC_001222	-24	64
ssc-miR-133b	LNC_000740	-24	346
ssc-miR-133b	LNC_001441	-24	170
ssc-miR-133b	LNC_000070	-24	154
ssc-miR-133b	LNC_002044	-24	285
ssc-miR-133b	LNC_001623	-24	48
ssc-miR-133b	LNC_000486	-24	49
ssc-miR-133b	LNC_001373	-23.7	116
ssc-miR-133b	LNC_002331	-23.6	375
ssc-miR-133b	LNC_001096	-23.6	104
ssc-miR-133b	LNC_000226	-23.4	342
ssc-miR-133b	LNC_000068	-23.1	86
ssc-miR-133b	LNC_001520	-22.9	410
ssc-miR-133b	LNC_000374	-22.7	130
ssc-miR-133b	LNC_002001	-22.4	320
ssc-miR-133b	LNC_001678	-22.3	2397
ssc-miR-133b	LNC_002345	-22.2	1
ssc-miR-133b	LNC_000187	-22.1	506
ssc-miR-133b	LNC_000550	-21.7	133
ssc-miR-133b	LNC_002190	-21.4	56
ssc-miR-133b	LNC_001110	-21.3	748
ssc-miR-133b	LNC_002337	-20.5	365
ssc-miR-133b	LNC_000689	-20.5	147
ssc-miR-133b	LNC_001897	-20.4	161
ssc-miR-133b	LNC_000962	-20.4	145
ssc-miR-133b	LNC_002277	-20.3	239
ssc-miR-133b	LNC_001241	-20.3	37
ssc-miR-1343	LNC_001432	-37	271
ssc-miR-1343	LNC_002345	-36.8	67
ssc-miR-1343	LNC_001096	-36.8	1605
ssc-miR-1343	LNC_002331	-35.7	104
ssc-miR-1343	LNC_002276	-35.3	2082
ssc-miR-1343	LNC_000499	-34.4	339
ssc-miR-1343	LNC_001588	-34	304
ssc-miR-1343	LNC_001346	-33.9	1220
ssc-miR-1343	LNC_002001	-33.6	214
ssc-miR-1343	LNC_000504	-33.3	192
ssc-miR-1343	LNC_000926	-33.3	1334
ssc-miR-1343	LNC_001374	-33.2	1081
ssc-miR-1343	LNC_001602	-33	414
ssc-miR-1343	LNC_002016	-32.9	1422
ssc-miR-1343	LNC_001235	-32.6	677
ssc-miR-1343	LNC_002190	-32.6	33
ssc-miR-1343	LNC_002272	-32.1	1136
ssc-miR-1343	LNC_001375	-32.1	707
ssc-miR-1343	LNC_000261	-30.9	1170
ssc-miR-1343	LNC_000994	-30.8	876
ssc-miR-1343	LNC_000298	-30.6	1424
ssc-miR-1343	LNC_001520	-30.1	52
ssc-miR-1343	LNC_001646	-29.8	354
ssc-miR-1343	LNC_000708	-29.7	586
ssc-miR-1343	ALDBSSCT0000001463	-29.6	770
ssc-miR-1343	LNC_001589	-29.5	108
ssc-miR-1343	LNC_001373	-29.2	128
ssc-miR-1343	LNC_000303	-28.8	1634
ssc-miR-1343	LNC_000881	-28.7	20
ssc-miR-1343	LNC_002309	-28.6	201
ssc-miR-1343	LNC_001711	-28.5	96
ssc-miR-1343	LNC_001995	-28.2	101
ssc-miR-1343	LNC_002332	-28.1	27
ssc-miR-1343	LNC_000415	-28.1	216
ssc-miR-1343	LNC_002450	-28	605
ssc-miR-1343	LNC_000719	-27.9	130
ssc-miR-1343	LNC_002280	-27.8	2533
ssc-miR-1343	LNC_001897	-27.4	685
ssc-miR-1343	LNC_002328	-27.4	2846
ssc-miR-1343	LNC_002308	-27	271
ssc-miR-1343	LNC_002337	-26.4	507
ssc-miR-1343	LNC_000962	-26.4	363
ssc-miR-1343	LNC_000068	-26.3	870
ssc-miR-1343	LNC_001678	-25.7	2461
ssc-miR-1343	ALDBSSCT0000003459	-24.8	799
ssc-miR-1343	LNC_001987	-24.2	100
ssc-miR-1343	LNC_001444	-23.5	419
ssc-miR-1343	LNC_001412	-23	854
ssc-miR-1343	ALDBSSCT0000001449	-22.9	47
ssc-miR-1343	LNC_000236	-22.5	331
ssc-miR-1343	LNC_000226	-22.4	136
ssc-miR-1343	LNC_002277	-22.3	1135
ssc-miR-1343	LNC_002300	-22.1	180
ssc-miR-1343	LNC_001590	-22.1	923
ssc-miR-1343	LNC_002339	-22	100
ssc-miR-1343	LNC_002065	-21.9	38
ssc-miR-1343	LNC_002292	-21.6	1001
ssc-miR-1343	LNC_001536	-21.1	316
ssc-miR-1343	LNC_001312	-20.5	92
ssc-miR-135	LNC_002276	-24.7	214
ssc-miR-135	LNC_000261	-24.4	1444
ssc-miR-135	LNC_000994	-24.2	1154
ssc-miR-135	LNC_002308	-23.7	1
ssc-miR-135	ALDBSSCT0000001463	-23.2	929
ssc-miR-135	LNC_002328	-23.1	2363
ssc-miR-135	LNC_002292	-23	299
ssc-miR-135	LNC_002280	-22.9	2486
ssc-miR-135	LNC_001432	-22.8	3491
ssc-miR-135	LNC_000962	-22.7	74
ssc-miR-135	LNC_001602	-22.5	3691
ssc-miR-135	LNC_001346	-22.5	661
ssc-miR-135	LNC_000236	-22.5	703
ssc-miR-135	LNC_001520	-22.4	661
ssc-miR-135	LNC_001711	-22.4	178
ssc-miR-135	LNC_000187	-22.3	325
ssc-miR-135	LNC_001235	-22.2	2417
ssc-miR-135	LNC_000708	-22	452
ssc-miR-135	LNC_000298	-22	426
ssc-miR-135	ALDBSSCT0000009539	-21.9	175
ssc-miR-135	LNC_001412	-21.6	498
ssc-miR-135	LNC_002337	-21.3	88
ssc-miR-135	LNC_002272	-21.1	4747
ssc-miR-135	LNC_001678	-21.1	2292
ssc-miR-135	LNC_000926	-21.1	216
ssc-miR-135	LNC_000499	-20.9	623
ssc-miR-135	LNC_002016	-20.6	1580
ssc-miR-135	LNC_002450	-20.5	414
ssc-miR-135	LNC_000550	-20.5	12
ssc-miR-135	LNC_001441	-20.5	49
ssc-miR-135	LNC_000070	-20.5	33
ssc-miR-135	LNC_000374	-20.5	9
ssc-miR-135	LNC_001374	-20.3	242
ssc-miR-135	LNC_001375	-20.3	242
ssc-miR-135	LNC_001590	-20.1	1720
ssc-miR-135	LNC_002378	-20.1	35
ssc-miR-135	LNC_002332	-20.1	135
ssc-miR-135	LNC_000740	-20	225
ssc-miR-135	LNC_002044	-20	164
ssc-miR-135	LNC_000303	-20	687
ssc-miR-136-3p	LNC_002272	-23.7	577
ssc-miR-136-3p	LNC_002280	-23.2	1091
ssc-miR-136-3p	LNC_002328	-23.2	800
ssc-miR-136-3p	LNC_001346	-23.1	839
ssc-miR-136-3p	LNC_000708	-22.2	563
ssc-miR-136-3p	LNC_002190	-21.6	192
ssc-miR-136-3p	LNC_001432	-20.6	1682
ssc-miR-136-5p	LNC_000298	-30.9	323
ssc-miR-136-5p	ALDBSSCT0000001463	-27.5	825
ssc-miR-136-5p	LNC_002332	-25.2	472
ssc-miR-136-5p	LNC_000994	-24.9	1587
ssc-miR-136-5p	LNC_002279	-24.3	1016
ssc-miR-136-5p	LNC_001346	-24.1	2685
ssc-miR-136-5p	LNC_001235	-24.1	1000
ssc-miR-136-5p	LNC_001602	-23.7	158
ssc-miR-136-5p	LNC_002450	-22.4	1182
ssc-miR-136-5p	LNC_002272	-22.3	411
ssc-miR-136-5p	LNC_002337	-22	12
ssc-miR-136-5p	LNC_000261	-21.9	497
ssc-miR-136-5p	LNC_002339	-21.4	52
ssc-miR-136-5p	LNC_001897	-21.4	1118
ssc-miR-136-5p	LNC_001995	-21.1	123
ssc-miR-136-5p	LNC_000499	-21.1	913
ssc-miR-136-5p	LNC_001444	-20.9	394
ssc-miR-136-5p	LNC_000303	-20.8	1607
ssc-miR-136-5p	ALDBSSCT0000003459	-20.3	766
ssc-miR-136-5p	LNC_002345	-20.2	246
ssc-miR-136-5p	LNC_000226	-20	329
ssc-miR-137	LNC_000261	-28.7	2199
ssc-miR-137	LNC_001602	-21.7	180
ssc-miR-137	LNC_001346	-20.6	2061
ssc-miR-137	LNC_001235	-20.6	377
ssc-miR-137	LNC_001520	-20.5	1077
ssc-miR-137	LNC_000187	-20	501
ssc-miR-138	LNC_002308	-28.8	177
ssc-miR-138	LNC_000261	-28.6	2021
ssc-miR-138	LNC_001346	-28	207
ssc-miR-138	LNC_000881	-27.2	157
ssc-miR-138	LNC_001897	-27	1501
ssc-miR-138	LNC_001432	-26.6	5104
ssc-miR-138	LNC_001590	-26	673
ssc-miR-138	LNC_002276	-26	804
ssc-miR-138	LNC_001235	-26	1765
ssc-miR-138	LNC_000499	-25.9	112
ssc-miR-138	ALDBSSCT0000009539	-25.9	480
ssc-miR-138	LNC_000962	-25.8	154
ssc-miR-138	LNC_001711	-25.4	126
ssc-miR-138	LNC_000187	-25.2	401
ssc-miR-138	LNC_002280	-25	2368
ssc-miR-138	LNC_002328	-25	2241
ssc-miR-138	LNC_002272	-24.6	1205
ssc-miR-138	LNC_002044	-24.4	385
ssc-miR-138	LNC_001995	-24.2	91
ssc-miR-138	LNC_001053	-24.1	230
ssc-miR-138	ALDBSSCT0000001463	-24.1	1049
ssc-miR-138	LNC_002300	-23.8	92
ssc-miR-138	LNC_001520	-23.7	958
ssc-miR-138	LNC_002016	-23	1922
ssc-miR-138	LNC_001096	-22.8	927
ssc-miR-138	LNC_001536	-22.8	379
ssc-miR-138	LNC_000298	-22.7	2817
ssc-miR-138	LNC_001412	-22.6	1009
ssc-miR-138	LNC_000994	-22.5	1017
ssc-miR-138	LNC_002331	-22.4	449
ssc-miR-138	LNC_001588	-22.2	6
ssc-miR-138	LNC_001374	-21.8	1287
ssc-miR-138	LNC_000926	-21.8	401
ssc-miR-138	LNC_001602	-21.7	1833
ssc-miR-138	LNC_000572	-21.3	280
ssc-miR-138	ENSSSCT00000037405	-21.2	49
ssc-miR-138	LNC_001646	-21.1	51
ssc-miR-138	LNC_001678	-21	101
ssc-miR-138	LNC_000920	-21	147
ssc-miR-138	LNC_002450	-20.6	1681
ssc-miR-138	LNC_001217	-20.6	613
ssc-miR-138	LNC_002309	-20.5	138
ssc-miR-138	LNC_000708	-20.3	879
ssc-miR-138	LNC_000504	-20.3	869
ssc-miR-138	LNC_002190	-20.2	238
ssc-miR-138	LNC_000550	-20.1	18
ssc-miR-138	LNC_000070	-20.1	39
ssc-miR-138	LNC_000374	-20.1	15
ssc-miR-1388	LNC_002280	-27.2	430
ssc-miR-1388	LNC_002328	-27.2	139
ssc-miR-1388	LNC_000708	-27.1	349
ssc-miR-1388	LNC_002272	-26.6	3287
ssc-miR-1388	LNC_001602	-25.7	3704
ssc-miR-1388	LNC_001346	-25.7	2630
ssc-miR-1388	LNC_001235	-25.7	946
ssc-miR-1388	LNC_000994	-24.7	2133
ssc-miR-1388	LNC_000261	-24.6	2057
ssc-miR-1388	ALDBSSCT0000003459	-24.3	774
ssc-miR-1388	LNC_001217	-23.7	358
ssc-miR-1388	LNC_002016	-22.8	1574
ssc-miR-1388	LNC_002279	-22.5	356
ssc-miR-1388	LNC_000686	-22.4	104
ssc-miR-1388	LNC_002289	-22.2	523
ssc-miR-1388	LNC_001520	-21.8	483
ssc-miR-1388	LNC_002339	-21.6	405
ssc-miR-1388	LNC_002449	-21.3	12
ssc-miR-1388	LNC_002276	-20.7	1842
ssc-miR-1388	LNC_000033	-20.6	202
ssc-miR-1388	LNC_001678	-20.5	251
ssc-miR-1388	LNC_001412	-20.3	901
ssc-miR-139-3p	LNC_001346	-34.8	255
ssc-miR-139-3p	LNC_000261	-34.3	1327
ssc-miR-139-3p	LNC_001235	-33.8	750
ssc-miR-139-3p	LNC_000881	-33.1	79
ssc-miR-139-3p	LNC_002272	-32.1	218
ssc-miR-139-3p	LNC_002016	-31.3	977
ssc-miR-139-3p	LNC_002331	-30.5	287
ssc-miR-139-3p	LNC_000187	-30.5	263
ssc-miR-139-3p	LNC_000504	-27.9	1098
ssc-miR-139-3p	LNC_000926	-27.7	477
ssc-miR-139-3p	LNC_000994	-27.6	2265
ssc-miR-139-3p	LNC_001432	-27.4	5027
ssc-miR-139-3p	LNC_000303	-26.8	967
ssc-miR-139-3p	LNC_001602	-26.7	2039
ssc-miR-139-3p	LNC_002309	-26.1	273
ssc-miR-139-3p	LNC_001241	-25.5	219
ssc-miR-139-3p	LNC_002450	-25.1	1929
ssc-miR-139-3p	LNC_001711	-24.9	73
ssc-miR-139-3p	LNC_001110	-24.9	88
ssc-miR-139-3p	LNC_002337	-24.6	141
ssc-miR-139-3p	LNC_001897	-23.9	335
ssc-miR-139-3p	LNC_001217	-23.9	575
ssc-miR-139-3p	LNC_000298	-23.8	694
ssc-miR-139-3p	LNC_000370	-23.8	168
ssc-miR-139-3p	LNC_001678	-23.7	310
ssc-miR-139-3p	LNC_002328	-23.4	478
ssc-miR-139-3p	LNC_002332	-23.4	235
ssc-miR-139-3p	LNC_002280	-23.1	770
ssc-miR-139-3p	LNC_001374	-23.1	146
ssc-miR-139-3p	LNC_001375	-23.1	146
ssc-miR-139-3p	ALDBSSCT0000001463	-22.5	2169
ssc-miR-139-3p	LNC_002279	-22.3	309
ssc-miR-139-3p	ALDBSSCT0000001449	-21.8	130
ssc-miR-139-3p	LNC_000236	-21.7	321
ssc-miR-139-3p	LNC_000068	-21.2	1050
ssc-miR-139-3p	LNC_001412	-20.6	312
ssc-miR-139-3p	LNC_000689	-20.4	417
ssc-miR-139-3p	LNC_000226	-20	545
ssc-miR-139-5p	LNC_001346	-29	3264
ssc-miR-139-5p	LNC_001235	-29	1580
ssc-miR-139-5p	LNC_001602	-28.4	3677
ssc-miR-139-5p	LNC_000719	-27.4	68
ssc-miR-139-5p	LNC_001110	-27.2	198
ssc-miR-139-5p	LNC_001053	-26.2	299
ssc-miR-139-5p	LNC_000926	-26.1	797
ssc-miR-139-5p	LNC_001432	-25.8	2577
ssc-miR-139-5p	LNC_001711	-25.5	103
ssc-miR-139-5p	LNC_000994	-25.4	1884
ssc-miR-139-5p	LNC_002272	-25.4	4890
ssc-miR-139-5p	LNC_000044	-25.4	100
ssc-miR-139-5p	LNC_002065	-25.2	135
ssc-miR-139-5p	LNC_000126	-25.1	111
ssc-miR-139-5p	LNC_000572	-25.1	56
ssc-miR-139-5p	LNC_000338	-25.1	162
ssc-miR-139-5p	LNC_000797	-25.1	94
ssc-miR-139-5p	LNC_000686	-25.1	16
ssc-miR-139-5p	LNC_001536	-25.1	3
ssc-miR-139-5p	LNC_000629	-25.1	110
ssc-miR-139-5p	LNC_001493	-25.1	77
ssc-miR-139-5p	LNC_000362	-25	55
ssc-miR-139-5p	LNC_002001	-24.5	442
ssc-miR-139-5p	LNC_001590	-24.4	1477
ssc-miR-139-5p	LNC_002279	-24.2	1130
ssc-miR-139-5p	ALDBSSCT0000001463	-24.2	2108
ssc-miR-139-5p	LNC_001738	-23.7	183
ssc-miR-139-5p	LNC_002286	-23.4	85
ssc-miR-139-5p	LNC_002450	-23.3	653
ssc-miR-139-5p	LNC_001096	-23.2	1789
ssc-miR-139-5p	LNC_001412	-22.6	297
ssc-miR-139-5p	LNC_000303	-22.4	691
ssc-miR-139-5p	LNC_001312	-22.3	21
ssc-miR-139-5p	LNC_000374	-22.1	477
ssc-miR-139-5p	LNC_002276	-21.9	2064
ssc-miR-139-5p	LNC_002277	-21.9	104
ssc-miR-139-5p	LNC_000226	-21.9	32
ssc-miR-139-5p	LNC_000740	-21.9	229
ssc-miR-139-5p	LNC_001441	-21.9	53
ssc-miR-139-5p	LNC_002044	-21.7	168
ssc-miR-139-5p	LNC_000920	-21.7	80
ssc-miR-139-5p	LNC_001300	-21.6	1
ssc-miR-139-5p	LNC_001374	-21.5	246
ssc-miR-139-5p	LNC_001375	-21.5	246
ssc-miR-139-5p	LNC_000550	-21.5	16
ssc-miR-139-5p	LNC_000070	-21.5	37
ssc-miR-139-5p	LNC_000415	-21.5	83
ssc-miR-139-5p	LNC_001678	-21.3	2397
ssc-miR-139-5p	LNC_000881	-21	354
ssc-miR-139-5p	ALDBSSCT0000001449	-20.9	333
ssc-miR-139-5p	LNC_002332	-20.8	808
ssc-miR-139-5p	LNC_000504	-20.3	534
ssc-miR-139-5p	LNC_000708	-20.2	825
ssc-miR-140-3p	LNC_001346	-32.9	2141
ssc-miR-140-3p	LNC_002276	-29.1	605
ssc-miR-140-3p	LNC_001235	-29	456
ssc-miR-140-3p	LNC_000236	-28	127
ssc-miR-140-3p	LNC_000415	-27.5	51
ssc-miR-140-3p	LNC_000126	-26.5	81
ssc-miR-140-3p	LNC_000572	-26.5	26
ssc-miR-140-3p	LNC_000338	-26.5	132
ssc-miR-140-3p	LNC_000797	-26.5	64
ssc-miR-140-3p	LNC_000926	-26.5	1562
ssc-miR-140-3p	LNC_000629	-26.5	80
ssc-miR-140-3p	LNC_001493	-26.5	47
ssc-miR-140-3p	LNC_000362	-26.4	22
ssc-miR-140-3p	LNC_002065	-25.4	138
ssc-miR-140-3p	LNC_000226	-25.2	28
ssc-miR-140-3p	LNC_001312	-25.2	24
ssc-miR-140-3p	ALDBSSCT0000001449	-25	331
ssc-miR-140-3p	LNC_001590	-24.7	292
ssc-miR-140-3p	LNC_001711	-24.2	100
ssc-miR-140-3p	LNC_000920	-24.1	91
ssc-miR-140-3p	LNC_001432	-23.6	4376
ssc-miR-140-3p	LNC_000374	-23.4	491
ssc-miR-140-3p	LNC_000044	-23.4	116
ssc-miR-140-3p	LNC_001300	-22.6	5
ssc-miR-140-3p	LNC_001602	-22.5	2303
ssc-miR-140-3p	LNC_002279	-22.5	1117
ssc-miR-140-3p	LNC_000068	-22.5	337
ssc-miR-140-3p	LNC_001096	-21.4	520
ssc-miR-140-3p	LNC_002277	-20.8	340
ssc-miR-140-3p	LNC_000994	-20.3	2776
ssc-miR-140-5p	LNC_001590	-31.3	1493
ssc-miR-140-5p	LNC_000994	-28.5	1024
ssc-miR-140-5p	LNC_002345	-27.5	257
ssc-miR-140-5p	LNC_001053	-27.2	84
ssc-miR-140-5p	LNC_001346	-26.6	1558
ssc-miR-140-5p	LNC_000303	-25.8	252
ssc-miR-140-5p	LNC_001602	-25.3	3206
ssc-miR-140-5p	LNC_001987	-25.1	315
ssc-miR-140-5p	LNC_000962	-24.6	177
ssc-miR-140-5p	LNC_000261	-24.2	1222
ssc-miR-140-5p	LNC_002272	-24.1	1308
ssc-miR-140-5p	LNC_000881	-23.8	346
ssc-miR-140-5p	LNC_001096	-23.7	379
ssc-miR-140-5p	LNC_002279	-23.5	477
ssc-miR-140-5p	LNC_000298	-23.5	4111
ssc-miR-140-5p	LNC_002276	-23.4	1262
ssc-miR-140-5p	LNC_002309	-23.4	229
ssc-miR-140-5p	LNC_001995	-23.3	1
ssc-miR-140-5p	LNC_002001	-23.3	358
ssc-miR-140-5p	LNC_002308	-23.1	306
ssc-miR-140-5p	LNC_001217	-23.1	517
ssc-miR-140-5p	LNC_002337	-23	103
ssc-miR-140-5p	LNC_001678	-23	1864
ssc-miR-140-5p	LNC_002331	-23	147
ssc-miR-140-5p	LNC_001432	-22.9	253
ssc-miR-140-5p	LNC_001235	-22.8	328
ssc-miR-140-5p	LNC_000068	-22.6	1114
ssc-miR-140-5p	LNC_000226	-22.5	36
ssc-miR-140-5p	ENSSSCT00000037405	-22.3	132
ssc-miR-140-5p	ALDBSSCT0000003459	-22.2	476
ssc-miR-140-5p	LNC_001520	-22	881
ssc-miR-140-5p	LNC_002277	-21.7	170
ssc-miR-140-5p	LNC_000504	-21.6	541
ssc-miR-140-5p	LNC_001441	-21.6	74
ssc-miR-140-5p	LNC_000926	-21.5	316
ssc-miR-140-5p	LNC_002190	-21.2	396
ssc-miR-140-5p	LNC_002292	-21.1	996
ssc-miR-140-5p	LNC_001374	-21.1	372
ssc-miR-140-5p	LNC_001375	-21.1	372
ssc-miR-140-5p	LNC_000550	-21.1	48
ssc-miR-140-5p	LNC_001412	-21	420
ssc-miR-140-5p	LNC_002280	-20.8	2485
ssc-miR-140-5p	LNC_002339	-20.8	471
ssc-miR-140-5p	LNC_002016	-20.5	643
ssc-miR-140-5p	LNC_000499	-20.4	158
ssc-miR-140-5p	LNC_002378	-20.3	78
ssc-miR-140-5p	LNC_000070	-20.3	76
ssc-miR-140-5p	LNC_000374	-20.3	52
ssc-miR-140-5p	LNC_002044	-20.3	207
ssc-miR-140-5p	LNC_000370	-20.3	17
ssc-miR-140-5p	LNC_000708	-20.2	654
ssc-miR-140-5p	LNC_000920	-20	154
ssc-miR-140-5p	LNC_000719	-20	31
ssc-miR-141	LNC_001432	-21.9	4213
ssc-miR-141	LNC_001602	-21.2	3183
ssc-miR-141	LNC_002272	-20.8	138
ssc-miR-141	LNC_002450	-20.5	669
ssc-miR-141	LNC_000686	-20	22
ssc-miR-142-3p	LNC_001646	-26.2	103
ssc-miR-142-3p	LNC_000226	-25.1	271
ssc-miR-142-3p	ALDBSSCT0000001463	-24.8	2711
ssc-miR-142-3p	LNC_001588	-23.8	144
ssc-miR-142-3p	LNC_002331	-23	486
ssc-miR-142-3p	LNC_002308	-22.3	148
ssc-miR-142-3p	LNC_002292	-22.2	1231
ssc-miR-142-3p	LNC_002300	-22	187
ssc-miR-142-3p	LNC_001520	-21.8	432
ssc-miR-142-3p	LNC_001602	-21.5	1237
ssc-miR-142-3p	LNC_000994	-21.1	2170
ssc-miR-142-3p	LNC_002332	-20.9	381
ssc-miR-142-3p	LNC_001053	-20.9	754
ssc-miR-142-3p	LNC_002272	-20.7	757
ssc-miR-142-3p	LNC_000298	-20.6	721
ssc-miR-142-3p	LNC_002280	-20.4	959
ssc-miR-142-3p	LNC_002328	-20.4	667
ssc-miR-142-3p	LNC_000068	-20.3	991
ssc-miR-142-3p	LNC_001897	-20.3	1236
ssc-miR-142-3p	LNC_000708	-20.2	168
ssc-miR-142-3p	LNC_002309	-20.1	647
ssc-miR-142-3p	LNC_000374	-20.1	415
[truncated: 10,139 more rows]
